# Supplementary material for: The Causal Association of Irritable Bowel Syndrome with Multiple Disease Outcomes: A Phenome-Wide Mendelian Randomization Study
Source: J Clin Med. 2023 Jan 31;12(3):1106. doi: 10.3390/jcm12031106 (PMC9918111; doi:10.3390/jcm12031106)
Supplement: Supplementary file 1 [file jcm-12-01106-s001.zip › Supplementary figures and tables.pdf]

**Table S1. Exclusion criteria of ICD-10, self-reported and operative codes in IBS cases definition.** ICD-10, International Classification of Diseases version 10; IBS, irritable bowel syndrome.

| ICD-10 |                                      | Self-reported |                        | Operative procedures |                                             |
|--------|--------------------------------------|---------------|------------------------|----------------------|---------------------------------------------|
| codes  | Description                          | codes in UKB  | Description            | - OPCS4 codes        | Description                                 |
| K50    | Crohn's disease [regional enteritis] | 1462          | crohns disease         | G01                  | Excision of oesophagus and stomach          |
| K500   | Crohn's disease of small intestine   | 1463          | ulcerative colitis     | G02                  | Total excision of oesophagus                |
|        |                                      |               | colitis/not crohns or  |                      |                                             |
| K501   | Crohn's disease of large intestine   | 1459          | ulcerative colitis     | G03                  | Partial excision of oesophagus              |
|        |                                      |               | inflammatory bowel     |                      |                                             |
| K508   | Other Crohn's disease                | 1461          | disease                | G05                  | Bypass of oesophagus                        |
| K509   | Crohn's disease, unspecified         | 1164          | pancreatic disease     | G06                  | Attention to connection of oesophagus       |
| K51    | Ulcerative colitis                   | 1165          | pancreatitis           | G08                  | Artificial opening into oesophagus          |
|        |                                      |               | malabsorption/coelia   |                      |                                             |
| K510   | Ulcerative (chronic) enterocolitis   | 1456          | c disease              | G27                  | Total excision of stomach                   |
|        |                                      |               | gastrointestinal       |                      |                                             |
| K511   | Ulcerative (chronic) ileocolitis     | 1191          | bleeding               | G28                  | Partial excision of stomach                 |
|        |                                      |               | gastroenteritis/dysent |                      |                                             |
| K512   | Ulcerative (chronic) proctitis       | 1509          | ry                     | G31                  | Connection of stomach to duodenum           |
|        | Ulcerative (chronic)                 |               | bowel / intestinal     |                      |                                             |
| K513   | rectosigmoiditis                     | 1600          | perforation            | G32                  | Connection of stomach to transposed jejunum |
|        |                                      |               | bowel / intestinal     |                      |                                             |
| K514   | Pseudopolyposis of colon             | 1601          | infarction             | G33                  | Other connection of stomach to jejunum      |
|        |                                      |               | bowel / intestinal     |                      |                                             |
| K515   | Mucosal proctocolitis                | 1602          | obstruction            | G34                  | Artificial opening into stomach             |
| K518   | Other ulcerative colitis             | 1135          | stomach disorder       | G49                  | Excision of duodenum                        |
| K519   | Ulcerative colitis, unspecified      |               |                        | G51                  | Bypass of duodenum                          |

|      |                                                            |     |                                            |
|------|------------------------------------------------------------|-----|--------------------------------------------|
| K52  | Other non-infective gastro-enteritis and colitis           | G58 | Excision of jejunum                        |
| K520 | Gastro-enteritis and colitis due to radiation              | G60 | Artificial opening into jejunum            |
| K521 | Toxic gastro-enteritis and colitis                         | G61 | Bypass of jejunum                          |
| K522 | Allergic and dietetic gastro-enteritis and colitis         | G69 | Excision of ileum                          |
| K523 | Indeterminate colitis                                      | G71 | Bypass of ileum                            |
| K528 | Other specified non-infective gastro-enteritis and colitis | G72 | Other connection of ileum                  |
| K529 | Non-infective gastro-enteritis and colitis, unspecified    | G73 | Attention to connection of ileum           |
| K550 | Acute vascular disorders of intestine                      | G74 | Creation of artificial opening into ileum  |
| K551 | Chronic vascular disorders of intestine                    | G75 | Attention to artificial opening into ileum |
| K627 | Radiation proctitis                                        | H04 | Total excision of colon and rectum         |
| K86  | Other diseases of pancreas                                 | H05 | Total excision of colon                    |
| K860 | Alcohol-induced chronic pancreatitis                       | H06 | Extended excision of right hemicolon       |
| K861 | Other chronic pancreatitis                                 | H07 | Other excision of right hemicolon          |
| K862 | Cyst of pancreas                                           | H08 | Excision of transverse colon               |
| K863 | Pseudocyst of pancreas                                     | H09 | Excision of left hemicolon                 |
| K868 | Other specified diseases of pancreas                       | H10 | Excision of sigmoid colon                  |
| K869 | Disease of pancreas, unspecified                           | H11 | Other excision of colon                    |

|      |                                                               |     |                                                                                      |
|------|---------------------------------------------------------------|-----|--------------------------------------------------------------------------------------|
| K90  | Intestinal malabsorption                                      | H13 | Bypass of colon                                                                      |
| K900 | Coeliac disease                                               | H14 | Exteriorisation of caecum                                                            |
| K901 | Tropical sprue                                                | H29 | Subtotal excision of colon                                                           |
| K903 | Pancreatic steatorrhoea                                       | H33 | Excision of rectum                                                                   |
| K904 | Malabsorption due to intolerance,<br>not elsewhere classified | H47 | Excision of anus                                                                     |
| K908 | Other intestinal malabsorption                                | H57 | Other operations on the anal sphincter to control<br>continence                      |
| K909 | Intestinal malabsorption,<br>unspecified                      | H68 | Diagnostic endoscopic examination of enteric<br>pouch using colonoscope              |
| C15  | Malignant neoplasm of<br>oesophagus                           | H69 | Diagnostic endoscopic examination of enteric<br>pouch using fiberoptic sigmoidoscope |
| C16  | Malignant neoplasm of stomach                                 | H70 | Diagnostic endoscopic examination of enteric<br>pouch using rigid sigmoidoscope      |
| C17  | Malignant neoplasm of small<br>intestine                      |     |                                                                                      |
| C18  | Malignant neoplasm of colon                                   |     |                                                                                      |
| C19  | Malignant neoplasm of<br>rectosigmoid junction                |     |                                                                                      |
| C20  | Malignant neoplasm of rectum                                  |     |                                                                                      |
| C21  | Malignant neoplasm of anus and<br>anal canal                  |     |                                                                                      |
| C22  | Malignant neoplasm of liver and<br>intrahepatic bile ducts    |     |                                                                                      |
| C23  | Malignant neoplasm of gallbladder                             |     |                                                                                      |

---

|     |                                    |
|-----|------------------------------------|
|     | Malignant neoplasm of other and    |
| C24 | unspecified parts of biliary tract |
| C25 | Malignant neoplasm of pancreas     |
|     | Malignant neoplasm of other and    |
| C26 | ill-defined digestive organs       |

---

**Table S2. The number of cases in each disease category.**

| Disease Category                                                                                    | No.<br>of<br>Phecodes | Phecode Cases Distribution |        |      |         |
|-----------------------------------------------------------------------------------------------------|-----------------------|----------------------------|--------|------|---------|
|                                                                                                     |                       | Minimum                    | Median | Mean | Maximum |
| Certain infectious and parasitic diseases                                                           | 22                    | 86                         | 597    | 1497 | 6928    |
| Congenital malformations, deformations and chromosomal abnormalities                                | 16                    | 86                         | 113    | 150  | 379     |
| Diseases of the blood and blood-forming organs and certain disorders involving the immune mechanism | 19                    | 13                         | 443    | 1355 | 9465    |
| Diseases of the circulatory system                                                                  | 59                    | 83                         | 1026   | 3280 | 51976   |
| Diseases of the digestive system                                                                    | 63                    | 86                         | 1672   | 3834 | 22706   |
| Diseases of the ear and mastoid process                                                             | 16                    | 111                        | 491    | 680  | 3768    |
| Diseases of the eye and adnexa                                                                      | 32                    | 134                        | 576    | 1802 | 13462   |
| Diseases of the genitourinary system                                                                | 62                    | 93                         | 881    | 1863 | 13197   |
| Diseases of the musculoskeletal system and connective tissue                                        | 61                    | 112                        | 1035   | 2708 | 15690   |
| Diseases of the nervous system                                                                      | 44                    | 86                         | 360    | 855  | 5977    |
| Diseases of the respiratory system                                                                  | 46                    | 96                         | 535    | 1702 | 16080   |
| Diseases of the skin and subcutaneous tissue                                                        | 33                    | 79                         | 565    | 1085 | 5311    |
| Endocrine, nutritional and metabolic diseases                                                       | 31                    | 90                         | 733    | 2938 | 26121   |
| Mental and behavioural disorders                                                                    | 29                    | 65                         | 318    | 1377 | 10163   |
| Neoplasms                                                                                           | 91                    | 84                         | 427    | 1064 | 10453   |
| Pregnancy, childbirth and the puerperium                                                            | 41                    | 69                         | 227    | 367  | 1969    |

**Table S3. SNP information of instrumental variables of IBS used in summary-level MR analysis.** SNP, single nucleotide polymorphism; EAF: effect allele frequency; SE: Standard Error.

| SNP         | Chromosome | Position  | Effect allele | Other allele | EAF    | Beta    | SE     | P value  | N Case | N Control | F        |
|-------------|------------|-----------|---------------|--------------|--------|---------|--------|----------|--------|-----------|----------|
| rs117391602 | 8          | 143263875 | A             | G            | 0.0204 | -0.1191 | 0.0269 | 9.53E-06 | 50019  | 358262    | 19.60284 |
| rs11738752  | 5          | 124586111 | A             | C            | 0.7148 | -0.0341 | 0.0077 | 9.32E-06 | 53400  | 433201    | 19.61224 |
| rs10010358  | 4          | 5405805   | A             | C            | 0.2616 | -0.0355 | 0.008  | 9.16E-06 | 53400  | 418587    | 19.69141 |
| rs142888522 | 4          | 157994712 | A             | G            | 0.0112 | -0.1556 | 0.0349 | 8.01E-06 | 50019  | 392122    | 19.8778  |
| rs35356207  | 8          | 125129099 | A             | C            | 0.3191 | 0.033   | 0.0074 | 8.75E-06 | 53400  | 433201    | 19.88678 |
| rs2055084   | 12         | 92428531  | A             | G            | 0.0631 | 0.0683  | 0.0153 | 8.43E-06 | 50019  | 355329    | 19.92776 |
| rs2669290   | 8          | 5583585   | A             | G            | 0.9154 | -0.0636 | 0.0142 | 8.17E-06 | 44437  | 300342    | 20.06031 |
| rs74174359  | 19         | 5936112   | A             | G            | 0.0407 | -0.0851 | 0.019  | 7.42E-06 | 50019  | 351140    | 20.06097 |
| rs213368    | 3          | 60268028  | T             | C            | 0.1654 | 0.0413  | 0.0092 | 7.66E-06 | 53400  | 433201    | 20.15229 |
| rs77327887  | 10         | 130223023 | T             | C            | 0.9635 | -0.087  | 0.0193 | 6.65E-06 | 53400  | 411465    | 20.32001 |
| rs80094675  | 2          | 98951593  | A             | G            | 0.0401 | 0.0789  | 0.0175 | 6.69E-06 | 53400  | 430957    | 20.32722 |
| rs4559793   | 13         | 34720412  | A             | G            | 0.9516 | -0.0785 | 0.0174 | 6.52E-06 | 50019  | 364170    | 20.35358 |
| rs35094163  | 11         | 72465651  | A             | G            | 0.2323 | 0.037   | 0.0082 | 6.09E-06 | 53400  | 433201    | 20.3599  |
| rs6799861   | 3          | 23257084  | T             | G            | 0.652  | 0.0325  | 0.0072 | 6.25E-06 | 53400  | 433201    | 20.37519 |
| rs9874850   | 3          | 13919315  | T             | C            | 0.1447 | -0.0447 | 0.0099 | 6.55E-06 | 53400  | 433201    | 20.38659 |
| rs113742420 | 21         | 35046917  | T             | G            | 0.9856 | -0.1445 | 0.032  | 6.54E-06 | 50019  | 362223    | 20.39087 |
| rs79600573  | 14         | 80286922  | T             | C            | 0.0365 | 0.0877  | 0.0194 | 5.95E-06 | 50019  | 399016    | 20.43599 |
| rs71615648  | 5          | 20895170  | A             | G            | 0.0312 | -0.1185 | 0.0262 | 6.28E-06 | 40548  | 293220    | 20.45663 |
| rs188488    | 5          | 36992990  | A             | G            | 0.5663 | -0.0362 | 0.008  | 6.36E-06 | 44437  | 300342    | 20.47563 |
| rs10231223  | 7          | 24469952  | T             | C            | 0.7341 | -0.0353 | 0.0078 | 6.33E-06 | 53400  | 426079    | 20.48143 |

|             |    |           |   |   |        |         |        |          |       |        |          |
|-------------|----|-----------|---|---|--------|---------|--------|----------|-------|--------|----------|
| rs3134615   | 1  | 40362066  | A | C | 0.2486 | -0.0358 | 0.0079 | 5.85E-06 | 53400 | 433201 | 20.53581 |
| rs72676302  | 14 | 36912454  | T | C | 0.0493 | -0.0767 | 0.0169 | 5.90E-06 | 50019 | 398719 | 20.59763 |
| rs56336528  | 18 | 74185670  | T | C | 0.1004 | -0.0563 | 0.0124 | 5.97E-06 | 50019 | 361926 | 20.61453 |
| rs4697055   | 4  | 24267336  | A | G | 0.7904 | -0.0383 | 0.0084 | 5.44E-06 | 53400 | 433201 | 20.78926 |
| rs17210284  | 7  | 82516893  | T | C | 0.769  | -0.037  | 0.0081 | 4.78E-06 | 53400 | 433201 | 20.86572 |
| rs35418299  | 16 | 60721629  | A | G | 0.5058 | 0.0311  | 0.0068 | 4.76E-06 | 53400 | 433201 | 20.91717 |
| rs2828078   | 21 | 24713845  | A | G | 0.1428 | -0.0467 | 0.0102 | 4.45E-06 | 53400 | 422699 | 20.96203 |
| rs13251888  | 8  | 82696068  | A | G | 0.0551 | 0.0747  | 0.0163 | 4.83E-06 | 50019 | 357276 | 21.00226 |
| rs1968081   | 7  | 7610206   | A | C | 0.656  | 0.0335  | 0.0073 | 5.22E-06 | 53400 | 422699 | 21.0593  |
| rs2731562   | 2  | 144383183 | A | C | 0.5117 | -0.0317 | 0.0069 | 3.66E-06 | 53400 | 433201 | 21.1067  |
| rs11533038  | 9  | 84856691  | T | C | 0.4113 | 0.0322  | 0.007  | 3.60E-06 | 53400 | 433201 | 21.16    |
| rs2197542   | 2  | 119925686 | T | G | 0.1232 | 0.0484  | 0.0105 | 3.64E-06 | 53400 | 433201 | 21.24771 |
| rs12358694  | 10 | 72990966  | A | G | 0.5337 | -0.0328 | 0.0071 | 4.47E-06 | 53400 | 383378 | 21.3418  |
| rs2123209   | 15 | 74145915  | T | C | 0.1094 | 0.0509  | 0.011  | 3.33E-06 | 53400 | 433201 | 21.41165 |
| rs111491723 | 13 | 80110374  | A | C | 0.976  | 0.1153  | 0.0249 | 3.68E-06 | 50019 | 359979 | 21.44173 |
| rs5009448   | 6  | 29940488  | T | C | 0.2773 | -0.0366 | 0.0079 | 3.25E-06 | 53400 | 416724 | 21.46387 |
| rs112215352 | 12 | 59795763  | A | G | 0.9542 | -0.0794 | 0.0171 | 3.19E-06 | 53400 | 415577 | 21.56    |
| rs72811605  | 5  | 166034826 | A | G | 0.9423 | 0.0773  | 0.0166 | 3.29E-06 | 44437 | 312628 | 21.68417 |
| rs3096652   | 17 | 46762881  | A | G | 0.5029 | -0.0326 | 0.007  | 3.03E-06 | 53400 | 422699 | 21.68898 |
| rs150272003 | 12 | 124151841 | T | G | 0.9865 | -0.1593 | 0.0342 | 3.28E-06 | 46130 | 343043 | 21.69598 |
| rs1280622   | 3  | 136508008 | A | C | 0.5899 | 0.0322  | 0.0069 | 3.24E-06 | 53400 | 433201 | 21.77778 |
| rs7751504   | 6  | 97425657  | T | C | 0.3822 | -0.0328 | 0.007  | 2.96E-06 | 53400 | 433201 | 21.95592 |
| rs940468    | 7  | 114008173 | T | C | 0.5752 | 0.0328  | 0.007  | 2.77E-06 | 53400 | 426079 | 21.95592 |
| rs12727764  | 1  | 158982477 | T | G | 0.1602 | -0.0437 | 0.0093 | 2.95E-06 | 53400 | 433201 | 22.07989 |

|             |    |           |   |   |        |         |        |          |       |        |          |
|-------------|----|-----------|---|---|--------|---------|--------|----------|-------|--------|----------|
| rs183066057 | 10 | 32553717  | A | G | 0.9531 | -0.0945 | 0.0201 | 2.48E-06 | 40548 | 293220 | 22.10403 |
| rs56884006  | 14 | 61620772  | T | C | 0.7783 | -0.0433 | 0.0092 | 2.60E-06 | 50019 | 349640 | 22.15135 |
| rs7326447   | 13 | 99408540  | T | C | 0.0261 | 0.106   | 0.0224 | 2.30E-06 | 53400 | 415577 | 22.39318 |
| rs57810551  | 1  | 214526612 | T | G | 0.6391 | -0.0336 | 0.0071 | 2.29E-06 | 53400 | 433201 | 22.39556 |
| rs2728934   | 3  | 9463462   | A | G | 0.2621 | -0.0374 | 0.0079 | 2.09E-06 | 53400 | 426079 | 22.41243 |
| rs537793984 | 11 | 89795691  | A | G | 0.1522 | 0.0583  | 0.0123 | 2.02E-06 | 40548 | 293220 | 22.46606 |
| rs10917847  | 1  | 163752376 | A | G | 0.4656 | 0.0332  | 0.007  | 1.88E-06 | 53400 | 422699 | 22.49469 |
| rs56246023  | 3  | 159713073 | T | G | 0.1328 | -0.0584 | 0.0123 | 2.02E-06 | 40548 | 293220 | 22.5432  |
| rs17331469  | 9  | 120540904 | T | G | 0.1368 | 0.0473  | 0.0099 | 2.01E-06 | 53400 | 433201 | 22.82716 |
| rs1631779   | 7  | 97946450  | A | C | 0.0788 | -0.0611 | 0.0127 | 1.40E-06 | 53400 | 433201 | 23.14595 |
| rs9313179   | 5  | 7189925   | A | C | 0.6256 | -0.0342 | 0.0071 | 1.29E-06 | 53400 | 433201 | 23.20254 |
| rs12974306  | 19 | 10830281  | T | G | 0.483  | -0.0333 | 0.0069 | 1.35E-06 | 53400 | 433201 | 23.29112 |
| rs6471719   | 8  | 59380723  | T | C | 0.7214 | -0.0367 | 0.0076 | 1.43E-06 | 53400 | 433201 | 23.31873 |
| rs13031167  | 2  | 212706980 | T | G | 0.0896 | 0.0826  | 0.0171 | 1.31E-06 | 44437 | 300342 | 23.33285 |
| rs6887323   | 5  | 170848124 | A | G | 0.5418 | -0.0334 | 0.0069 | 1.31E-06 | 53400 | 433201 | 23.43121 |
| rs189713900 | 2  | 32329842  | A | G | 0.9844 | -0.1528 | 0.0315 | 1.18E-06 | 50019 | 347693 | 23.5302  |
| rs12692627  | 2  | 161873799 | A | G | 0.2838 | -0.0373 | 0.0076 | 8.31E-07 | 53400 | 433201 | 24.08743 |
| rs10268606  | 7  | 146689731 | T | C | 0.704  | 0.037   | 0.0075 | 8.36E-07 | 53400 | 433201 | 24.33778 |
| rs13250534  | 8  | 40280428  | T | G | 0.1418 | 0.0523  | 0.0106 | 7.92E-07 | 53400 | 413630 | 24.34398 |
| rs12464541  | 2  | 82353052  | T | C | 0.8001 | -0.0421 | 0.0085 | 7.27E-07 | 53400 | 433201 | 24.53163 |
| rs11656412  | 17 | 5155729   | A | G | 0.6096 | 0.0348  | 0.007  | 7.78E-07 | 53400 | 426079 | 24.7151  |
| rs6696068   | 1  | 53740797  | T | G | 0.3891 | -0.035  | 0.007  | 5.80E-07 | 53400 | 433201 | 25       |
| rs20551     | 22 | 41548008  | A | G | 0.7149 | -0.0375 | 0.0075 | 6.16E-07 | 53400 | 433201 | 25       |
| rs10044618  | 5  | 87781168  | T | C | 0.4316 | 0.035   | 0.0069 | 4.12E-07 | 53400 | 433201 | 25.72989 |
| rs2504511   | 1  | 176284750 | A | G | 0.4757 | -0.0346 | 0.0068 | 3.83E-07 | 53400 | 433201 | 25.89014 |
| rs5017929   | 8  | 94653283  | A | G | 0.7009 | 0.0387  | 0.0075 | 2.12E-07 | 53400 | 433201 | 26.6256  |

|            |    |           |   |   |        |         |        |          |       |        |          |
|------------|----|-----------|---|---|--------|---------|--------|----------|-------|--------|----------|
| rs13321176 | 3  | 150944808 | T | G | 0.8298 | 0.0478  | 0.0092 | 1.80E-07 | 53400 | 433201 | 26.9948  |
| rs2674053  | 2  | 59770395  | T | C | 0.8518 | -0.0501 | 0.0096 | 2.04E-07 | 53400 | 433201 | 27.23535 |
| rs8106322  | 19 | 32024230  | A | G | 0.646  | -0.0394 | 0.0075 | 1.45E-07 | 53400 | 416343 | 27.59751 |
| rs12549729 | 8  | 8523912   | T | G | 0.3898 | 0.0475  | 0.0086 | 2.88E-08 | 44437 | 310156 | 30.50635 |
| rs9513519  | 13 | 99610146  | A | G | 0.6168 | 0.0388  | 0.007  | 3.09E-08 | 53400 | 433201 | 30.72327 |
| rs2813573  | 13 | 53943333  | T | C | 0.4846 | -0.0378 | 0.0068 | 3.31E-08 | 53400 | 433201 | 30.90052 |
| rs7106434  | 11 | 112860579 | T | C | 0.4095 | 0.0384  | 0.0069 | 3.19E-08 | 53400 | 433201 | 30.97164 |
| rs10156602 | 9  | 96345328  | A | G | 0.633  | 0.0417  | 0.0071 | 4.36E-09 | 53400 | 433201 | 34.49494 |
| rs1248825  | 3  | 84993411  | A | C | 0.3253 | 0.0444  | 0.0073 | 1.20E-09 | 53400 | 430957 | 36.99306 |
| rs1052486  | 6  | 31610686  | A | G | 0.525  | -0.044  | 0.007  | 4.18E-10 | 53400 | 416724 | 39.5102  |

---

**Table S4. Power to detect associations between IBS and disease outcomes on available numbers of cases, considering different effect sizes for expected causal effect by genetically predicted IBS.** IBS, irritable bowel syndrome.

| Phc<br>odes | Description                                                                 | N Cases | N control | Beta<br>=0.1 | Beta<br>=0.2 | Beta<br>=0.3 | Beta<br>=0.4 | Beta<br>=0.5 | Beta<br>=0.6 | Beta<br>=0.7 | Beta<br>=0.8 | Beta<br>=0.9 | Beta<br>=1 |
|-------------|-----------------------------------------------------------------------------|---------|-----------|--------------|--------------|--------------|--------------|--------------|--------------|--------------|--------------|--------------|------------|
| A04         | Other bacterial intestinal infections                                       | 1616    | 146486    | 0.04         | 0.07         | 0.12         | 0.17         | 0.25         | 0.34         | 0.43         | 0.54         | 0.63         | 0.73       |
| A08         | Viral and other specified intestinal infections                             | 680     | 147422    | 0.04         | 0.05         | 0.07         | 0.1          | 0.13         | 0.17         | 0.21         | 0.27         | 0.32         | 0.38       |
| A09         | Diarrhoea and gastro-enteritis of presumed infectious origin                | 6928    | 141174    | 0.07         | 0.18         | 0.34         | 0.55         | 0.74         | 0.88         | 0.95         | 0.99         | 1            | 1          |
| A40         | Streptococcal septicaemia                                                   | 283     | 147819    | 0.03         | 0.04         | 0.05         | 0.06         | 0.08         | 0.09         | 0.11         | 0.14         | 0.16         | 0.19       |
| A41         | Other septicaemia                                                           | 5325    | 142777    | 0.07         | 0.15         | 0.28         | 0.45         | 0.63         | 0.79         | 0.89         | 0.96         | 0.98         | 1          |
| A49         | Bacterial infection of unspecified site                                     | 826     | 147276    | 0.04         | 0.06         | 0.08         | 0.11         | 0.15         | 0.2          | 0.25         | 0.31         | 0.38         | 0.45       |
| A63         | Other predominantly sexually transmitted diseases, not elsewhere classified | 94      | 148008    | 0.03         | 0.03         | 0.04         | 0.04         | 0.05         | 0.06         | 0.06         | 0.07         | 0.08         | 0.09       |
| B00         | Herpesviral [herpes simplex] infections                                     | 217     | 147885    | 0.03         | 0.04         | 0.05         | 0.06         | 0.07         | 0.08         | 0.1          | 0.11         | 0.13         | 0.15       |
| B02         | Zoster [herpes zoster]                                                      | 430     | 147672    | 0.03         | 0.05         | 0.06         | 0.08         | 0.1          | 0.12         | 0.15         | 0.18         | 0.22         | 0.26       |
| B07         | Viral warts                                                                 | 514     | 147588    | 0.03         | 0.05         | 0.06         | 0.08         | 0.11         | 0.14         | 0.17         | 0.21         | 0.26         | 0.3        |
| B17         | Other acute viral hepatitis                                                 | 89      | 148013    | 0.03         | 0.03         | 0.04         | 0.04         | 0.05         | 0.06         | 0.06         | 0.07         | 0.08         | 0.09       |
| B18         | Chronic viral hepatitis                                                     | 204     | 147898    | 0.03         | 0.04         | 0.05         | 0.06         | 0.07         | 0.08         | 0.09         | 0.11         | 0.13         | 0.15       |
| B25         | Cytomegaloviral disease                                                     | 86      | 148016    | 0.03         | 0.03         | 0.04         | 0.04         | 0.05         | 0.05         | 0.06         | 0.07         | 0.08         | 0.09       |
| B34         | Viral infection of unspecified site                                         | 1211    | 146891    | 0.04         | 0.06         | 0.1          | 0.14         | 0.2          | 0.26         | 0.34         | 0.43         | 0.51         | 0.6        |
| B35         | Dermatophytosis                                                             | 203     | 147899    | 0.03         | 0.04         | 0.05         | 0.06         | 0.07         | 0.08         | 0.09         | 0.11         | 0.13         | 0.15       |
| B37         | Candidiasis                                                                 | 2346    | 145756    | 0.05         | 0.09         | 0.15         | 0.23         | 0.34         | 0.45         | 0.58         | 0.69         | 0.79         | 0.87       |
| B44         | Aspergillosis                                                               | 136     | 147966    | 0.03         | 0.04         | 0.04         | 0.05         | 0.06         | 0.07         | 0.08         | 0.09         | 0.1          | 0.11       |

|     |                                                                                         |      |        |      |      |      |      |      |      |      |      |      |      |
|-----|-----------------------------------------------------------------------------------------|------|--------|------|------|------|------|------|------|------|------|------|------|
| B95 | Streptococcus and staphylococcus as the cause of diseases classified to other chapters  | 2974 | 145128 | 0.05 | 0.1  | 0.18 | 0.28 | 0.41 | 0.55 | 0.68 | 0.79 | 0.88 | 0.93 |
| B96 | Other bacterial agents as the cause of diseases classified to other chapters            | 6341 | 141761 | 0.07 | 0.17 | 0.32 | 0.51 | 0.7  | 0.85 | 0.94 | 0.98 | 0.99 | 1    |
| B97 | Viral agents as the cause of diseases classified to other chapters                      | 1257 | 146845 | 0.04 | 0.07 | 0.1  | 0.15 | 0.2  | 0.27 | 0.35 | 0.44 | 0.53 | 0.62 |
| B98 | Other specified infectious agents as the cause of diseases classified to other chapters | 965  | 147137 | 0.04 | 0.06 | 0.09 | 0.12 | 0.17 | 0.22 | 0.28 | 0.35 | 0.43 | 0.51 |
| B99 | Other and unspecified infectious diseases                                               | 199  | 147903 | 0.03 | 0.04 | 0.05 | 0.05 | 0.07 | 0.08 | 0.09 | 0.11 | 0.13 | 0.15 |
| C01 | Malignant neoplasm of base of tongue                                                    | 84   | 148018 | 0.03 | 0.03 | 0.04 | 0.04 | 0.05 | 0.05 | 0.06 | 0.07 | 0.08 | 0.08 |
| C02 | Malignant neoplasm of other and unspecified parts of tongue                             | 154  | 147948 | 0.03 | 0.04 | 0.04 | 0.05 | 0.06 | 0.07 | 0.08 | 0.09 | 0.11 | 0.12 |
| C09 | Malignant neoplasm of tonsil                                                            | 159  | 147943 | 0.03 | 0.04 | 0.04 | 0.05 | 0.06 | 0.07 | 0.08 | 0.09 | 0.11 | 0.12 |
| C15 | Malignant neoplasm of oesophagus                                                        | 676  | 147426 | 0.04 | 0.05 | 0.07 | 0.1  | 0.13 | 0.17 | 0.21 | 0.26 | 0.32 | 0.38 |
| C16 | Malignant neoplasm of stomach                                                           | 485  | 147617 | 0.03 | 0.05 | 0.06 | 0.08 | 0.1  | 0.13 | 0.16 | 0.2  | 0.24 | 0.29 |
| C17 | Malignant neoplasm of small intestine                                                   | 162  | 147940 | 0.03 | 0.04 | 0.04 | 0.05 | 0.06 | 0.07 | 0.08 | 0.1  | 0.11 | 0.13 |
| C18 | Malignant neoplasm of colon                                                             | 2383 | 145719 | 0.05 | 0.09 | 0.15 | 0.24 | 0.34 | 0.46 | 0.58 | 0.7  | 0.8  | 0.87 |
| C19 | Malignant neoplasm of rectosigmoid junction                                             | 599  | 147503 | 0.04 | 0.05 | 0.07 | 0.09 | 0.12 | 0.15 | 0.19 | 0.24 | 0.29 | 0.35 |
| C20 | Malignant neoplasm of rectum                                                            | 1072 | 147030 | 0.04 | 0.06 | 0.09 | 0.13 | 0.18 | 0.24 | 0.31 | 0.39 | 0.47 | 0.55 |
| C21 | Malignant neoplasm of anus and anal canal                                               | 149  | 147953 | 0.03 | 0.04 | 0.04 | 0.05 | 0.06 | 0.07 | 0.08 | 0.09 | 0.1  | 0.12 |
| C22 | Malignant neoplasm of liver and intrahepatic bile ducts                                 | 435  | 147667 | 0.03 | 0.05 | 0.06 | 0.08 | 0.1  | 0.12 | 0.15 | 0.19 | 0.22 | 0.27 |
| C24 | Malignant neoplasm of other and unspecified parts of biliary tract                      | 129  | 147973 | 0.03 | 0.03 | 0.04 | 0.05 | 0.06 | 0.06 | 0.07 | 0.08 | 0.1  | 0.11 |
| C25 | Malignant neoplasm of pancreas                                                          | 666  | 147436 | 0.04 | 0.05 | 0.07 | 0.1  | 0.13 | 0.17 | 0.21 | 0.26 | 0.32 | 0.38 |

|     |                                                                   |      |        |      |      |      |      |      |      |      |      |      |      |
|-----|-------------------------------------------------------------------|------|--------|------|------|------|------|------|------|------|------|------|------|
| C26 | Malignant neoplasm of other and ill-defined digestive organs      | 240  | 147862 | 0.03 | 0.04 | 0.05 | 0.06 | 0.07 | 0.09 | 0.1  | 0.12 | 0.14 | 0.17 |
| C32 | Malignant neoplasm of larynx                                      | 181  | 147921 | 0.03 | 0.04 | 0.04 | 0.05 | 0.06 | 0.07 | 0.09 | 0.1  | 0.12 | 0.14 |
| C34 | Malignant neoplasm of bronchus and lung                           | 1988 | 146114 | 0.05 | 0.08 | 0.13 | 0.2  | 0.29 | 0.4  | 0.51 | 0.62 | 0.72 | 0.81 |
| C43 | Malignant melanoma of skin                                        | 1811 | 146291 | 0.05 | 0.08 | 0.13 | 0.19 | 0.27 | 0.37 | 0.47 | 0.58 | 0.68 | 0.77 |
| C44 | Other malignant neoplasms of skin                                 | 9069 | 139033 | 0.09 | 0.22 | 0.43 | 0.66 | 0.84 | 0.94 | 0.99 | 1    | 1    | 1    |
| C45 | Mesothelioma                                                      | 221  | 147881 | 0.03 | 0.04 | 0.05 | 0.06 | 0.07 | 0.08 | 0.1  | 0.12 | 0.13 | 0.16 |
| C48 | Malignant neoplasm of retroperitoneum and peritoneum              | 154  | 147948 | 0.03 | 0.04 | 0.04 | 0.05 | 0.06 | 0.07 | 0.08 | 0.09 | 0.11 | 0.12 |
| C49 | Malignant neoplasm of other connective and soft tissue            | 222  | 147880 | 0.03 | 0.04 | 0.05 | 0.06 | 0.07 | 0.08 | 0.1  | 0.12 | 0.14 | 0.16 |
| C50 | Malignant neoplasm of breast                                      | 6530 | 141572 | 0.07 | 0.17 | 0.33 | 0.53 | 0.72 | 0.86 | 0.94 | 0.98 | 1    | 1    |
| C51 | Malignant neoplasm of vulva                                       | 88   | 148014 | 0.03 | 0.03 | 0.04 | 0.04 | 0.05 | 0.05 | 0.06 | 0.07 | 0.08 | 0.09 |
| C53 | Malignant neoplasm of cervix uteri                                | 369  | 147733 | 0.03 | 0.04 | 0.06 | 0.07 | 0.09 | 0.11 | 0.14 | 0.16 | 0.2  | 0.23 |
| C54 | Malignant neoplasm of corpus uteri                                | 888  | 147214 | 0.04 | 0.06 | 0.08 | 0.12 | 0.16 | 0.21 | 0.26 | 0.33 | 0.4  | 0.48 |
| C55 | Malignant neoplasm of uterus, part unspecified                    | 103  | 147999 | 0.03 | 0.03 | 0.04 | 0.04 | 0.05 | 0.06 | 0.07 | 0.07 | 0.08 | 0.1  |
| C56 | Malignant neoplasm of ovary                                       | 697  | 147405 | 0.04 | 0.05 | 0.07 | 0.1  | 0.13 | 0.17 | 0.22 | 0.27 | 0.33 | 0.39 |
| C57 | Malignant neoplasm of other and unspecified female genital organs | 106  | 147996 | 0.03 | 0.03 | 0.04 | 0.04 | 0.05 | 0.06 | 0.07 | 0.08 | 0.09 | 0.1  |
| C61 | Malignant neoplasm of prostate                                    | 5033 | 143069 | 0.07 | 0.14 | 0.27 | 0.43 | 0.61 | 0.76 | 0.88 | 0.95 | 0.98 | 0.99 |
| C62 | Malignant neoplasm of testis                                      | 278  | 147824 | 0.03 | 0.04 | 0.05 | 0.06 | 0.08 | 0.09 | 0.11 | 0.13 | 0.16 | 0.19 |
| C64 | Malignant neoplasm of kidney, except renal pelvis                 | 898  | 147204 | 0.04 | 0.06 | 0.08 | 0.12 | 0.16 | 0.21 | 0.27 | 0.33 | 0.41 | 0.48 |
| C66 | Malignant neoplasm of ureter                                      | 94   | 148008 | 0.03 | 0.03 | 0.04 | 0.04 | 0.05 | 0.06 | 0.06 | 0.07 | 0.08 | 0.09 |
| C67 | Malignant neoplasm of bladder                                     | 1629 | 146473 | 0.04 | 0.07 | 0.12 | 0.18 | 0.25 | 0.34 | 0.44 | 0.54 | 0.64 | 0.73 |
| C69 | Malignant neoplasm of eye and adnexa                              | 121  | 147981 | 0.03 | 0.03 | 0.04 | 0.05 | 0.05 | 0.06 | 0.07 | 0.08 | 0.09 | 0.1  |

|     |                                                                  |      |        |      |      |      |      |      |      |      |      |      |      |
|-----|------------------------------------------------------------------|------|--------|------|------|------|------|------|------|------|------|------|------|
| C71 | Malignant neoplasm of brain                                      | 427  | 147675 | 0.03 | 0.04 | 0.06 | 0.08 | 0.1  | 0.12 | 0.15 | 0.18 | 0.22 | 0.26 |
| C73 | Malignant neoplasm of thyroid gland                              | 283  | 147819 | 0.03 | 0.04 | 0.05 | 0.06 | 0.08 | 0.09 | 0.11 | 0.14 | 0.16 | 0.19 |
| C76 | Malignant neoplasm of other and ill-defined sites                | 107  | 147995 | 0.03 | 0.03 | 0.04 | 0.05 | 0.05 | 0.06 | 0.07 | 0.08 | 0.09 | 0.1  |
| C77 | Secondary and unspecified malignant neoplasm of lymph nodes      | 4315 | 143787 | 0.06 | 0.13 | 0.24 | 0.38 | 0.54 | 0.7  | 0.83 | 0.91 | 0.96 | 0.99 |
| C78 | Secondary malignant neoplasm of respiratory and digestive organs | 4469 | 143633 | 0.06 | 0.13 | 0.24 | 0.39 | 0.56 | 0.72 | 0.84 | 0.92 | 0.97 | 0.99 |
| C79 | Secondary malignant neoplasm of other sites                      | 3768 | 144334 | 0.06 | 0.12 | 0.21 | 0.34 | 0.49 | 0.64 | 0.78 | 0.87 | 0.94 | 0.97 |
| C80 | Malignant neoplasm without specification of site                 | 1368 | 146734 | 0.04 | 0.07 | 0.11 | 0.15 | 0.22 | 0.29 | 0.38 | 0.47 | 0.56 | 0.65 |
| C81 | Hodgkin's disease                                                | 210  | 147892 | 0.03 | 0.04 | 0.05 | 0.06 | 0.07 | 0.08 | 0.09 | 0.11 | 0.13 | 0.15 |
| C82 | Follicular [nodular] non-Hodgkin's lymphoma                      | 350  | 147752 | 0.03 | 0.04 | 0.05 | 0.07 | 0.09 | 0.11 | 0.13 | 0.16 | 0.19 | 0.22 |
| C83 | Diffuse non-Hodgkin's lymphoma                                   | 679  | 147423 | 0.04 | 0.05 | 0.07 | 0.1  | 0.13 | 0.17 | 0.21 | 0.26 | 0.32 | 0.38 |
| C84 | Peripheral and cutaneous T-cell lymphomas                        | 100  | 148002 | 0.03 | 0.03 | 0.04 | 0.04 | 0.05 | 0.06 | 0.07 | 0.07 | 0.08 | 0.09 |
| C85 | Other and unspecified types of non-Hodgkin's lymphoma            | 835  | 147267 | 0.04 | 0.06 | 0.08 | 0.11 | 0.15 | 0.2  | 0.25 | 0.31 | 0.38 | 0.45 |
| C88 | Malignant immunoproliferative diseases                           | 94   | 148008 | 0.03 | 0.03 | 0.04 | 0.04 | 0.05 | 0.06 | 0.06 | 0.07 | 0.08 | 0.09 |
| C90 | Multiple myeloma and malignant plasma cell neoplasms             | 522  | 147580 | 0.03 | 0.05 | 0.06 | 0.08 | 0.11 | 0.14 | 0.17 | 0.21 | 0.26 | 0.31 |
| C91 | Lymphoid leukaemia                                               | 481  | 147621 | 0.03 | 0.05 | 0.06 | 0.08 | 0.1  | 0.13 | 0.16 | 0.2  | 0.24 | 0.29 |
| C92 | Myeloid leukaemia                                                | 399  | 147703 | 0.03 | 0.04 | 0.06 | 0.07 | 0.09 | 0.12 | 0.14 | 0.17 | 0.21 | 0.25 |
| C97 | Malignant neoplasms of independent (primary) multiple sites      | 528  | 147574 | 0.03 | 0.05 | 0.06 | 0.08 | 0.11 | 0.14 | 0.18 | 0.22 | 0.26 | 0.31 |
| D03 | Melanoma in situ                                                 | 605  | 147497 | 0.04 | 0.05 | 0.07 | 0.09 | 0.12 | 0.15 | 0.19 | 0.24 | 0.29 | 0.35 |
| D04 | Carcinoma in situ of skin                                        | 667  | 147435 | 0.04 | 0.05 | 0.07 | 0.1  | 0.13 | 0.17 | 0.21 | 0.26 | 0.32 | 0.38 |

|     |                                                                    |       |        |      |      |      |      |      |      |      |      |      |      |
|-----|--------------------------------------------------------------------|-------|--------|------|------|------|------|------|------|------|------|------|------|
| D05 | Carcinoma in situ of breast                                        | 1323  | 146779 | 0.04 | 0.07 | 0.1  | 0.15 | 0.21 | 0.28 | 0.37 | 0.46 | 0.55 | 0.64 |
| D06 | Carcinoma in situ of cervix uteri                                  | 1535  | 146567 | 0.04 | 0.07 | 0.11 | 0.17 | 0.24 | 0.32 | 0.42 | 0.51 | 0.61 | 0.7  |
| D07 | Carcinoma in situ of other and unspecified genital organs          | 323   | 147779 | 0.03 | 0.04 | 0.05 | 0.07 | 0.08 | 0.1  | 0.12 | 0.15 | 0.18 | 0.21 |
| D09 | Carcinoma in situ of other and unspecified sites                   | 333   | 147769 | 0.03 | 0.04 | 0.05 | 0.07 | 0.08 | 0.1  | 0.13 | 0.15 | 0.18 | 0.21 |
| D10 | Benign neoplasm of mouth and pharynx                               | 1022  | 147080 | 0.04 | 0.06 | 0.09 | 0.13 | 0.17 | 0.23 | 0.3  | 0.37 | 0.45 | 0.53 |
| D11 | Benign neoplasm of major salivary glands                           | 290   | 147812 | 0.03 | 0.04 | 0.05 | 0.06 | 0.08 | 0.1  | 0.12 | 0.14 | 0.16 | 0.19 |
| D12 | Benign neoplasm of colon, rectum, anus and anal canal              | 10453 | 137649 | 0.09 | 0.24 | 0.47 | 0.71 | 0.88 | 0.97 | 0.99 | 1    | 1    | 1    |
| D13 | Benign neoplasm of other and ill-defined parts of digestive system | 777   | 147325 | 0.04 | 0.05 | 0.08 | 0.11 | 0.14 | 0.19 | 0.24 | 0.3  | 0.36 | 0.43 |
| D14 | Benign neoplasm of middle ear and respiratory system               | 158   | 147944 | 0.03 | 0.04 | 0.04 | 0.05 | 0.06 | 0.07 | 0.08 | 0.09 | 0.11 | 0.12 |
| D16 | Benign neoplasm of bone and articular cartilage                    | 169   | 147933 | 0.03 | 0.04 | 0.04 | 0.05 | 0.06 | 0.07 | 0.08 | 0.1  | 0.11 | 0.13 |
| D17 | Benign lipomatous neoplasm                                         | 3561  | 144541 | 0.06 | 0.11 | 0.2  | 0.33 | 0.47 | 0.62 | 0.75 | 0.86 | 0.92 | 0.97 |
| D18 | Haemangioma and lymphangioma, any site                             | 1022  | 147080 | 0.04 | 0.06 | 0.09 | 0.13 | 0.17 | 0.23 | 0.3  | 0.37 | 0.45 | 0.53 |
| D21 | Other benign neoplasms of connective and other soft tissue         | 354   | 147748 | 0.03 | 0.04 | 0.05 | 0.07 | 0.09 | 0.11 | 0.13 | 0.16 | 0.19 | 0.22 |
| D22 | Melanocytic naevi                                                  | 2542  | 145560 | 0.05 | 0.09 | 0.16 | 0.25 | 0.36 | 0.48 | 0.61 | 0.73 | 0.82 | 0.89 |
| D23 | Other benign neoplasms of skin                                     | 2157  | 145945 | 0.05 | 0.09 | 0.14 | 0.22 | 0.31 | 0.43 | 0.54 | 0.66 | 0.76 | 0.84 |
| D24 | Benign neoplasm of breast                                          | 737   | 147365 | 0.04 | 0.05 | 0.07 | 0.1  | 0.14 | 0.18 | 0.23 | 0.28 | 0.34 | 0.41 |
| D25 | Leiomyoma of uterus                                                | 4826  | 143276 | 0.06 | 0.14 | 0.26 | 0.42 | 0.59 | 0.75 | 0.86 | 0.94 | 0.98 | 0.99 |
| D26 | Other benign neoplasms of uterus                                   | 188   | 147914 | 0.03 | 0.04 | 0.04 | 0.05 | 0.06 | 0.08 | 0.09 | 0.1  | 0.12 | 0.14 |
| D27 | Benign neoplasm of ovary                                           | 800   | 147302 | 0.04 | 0.05 | 0.08 | 0.11 | 0.15 | 0.19 | 0.24 | 0.3  | 0.37 | 0.44 |
| D28 | Benign neoplasm of other and unspecified female genital organs     | 118   | 147984 | 0.03 | 0.03 | 0.04 | 0.05 | 0.05 | 0.06 | 0.07 | 0.08 | 0.09 | 0.1  |

|     |                                                                                                   |     |        |      |      |      |      |      |      |      |      |      |      |
|-----|---------------------------------------------------------------------------------------------------|-----|--------|------|------|------|------|------|------|------|------|------|------|
| D29 | Benign neoplasm of male genital organs                                                            | 93  | 148009 | 0.03 | 0.03 | 0.04 | 0.04 | 0.05 | 0.06 | 0.06 | 0.07 | 0.08 | 0.09 |
| D30 | Benign neoplasm of urinary organs                                                                 | 135 | 147967 | 0.03 | 0.04 | 0.04 | 0.05 | 0.06 | 0.07 | 0.08 | 0.09 | 0.1  | 0.11 |
| D31 | Benign neoplasm of eye and adnexa                                                                 | 112 | 147990 | 0.03 | 0.03 | 0.04 | 0.05 | 0.05 | 0.06 | 0.07 | 0.08 | 0.09 | 0.1  |
| D32 | Benign neoplasm of meninges                                                                       | 452 | 147650 | 0.03 | 0.05 | 0.06 | 0.08 | 0.1  | 0.13 | 0.16 | 0.19 | 0.23 | 0.27 |
| D33 | Benign neoplasm of brain and other parts of central nervous system                                | 248 | 147854 | 0.03 | 0.04 | 0.05 | 0.06 | 0.07 | 0.09 | 0.1  | 0.12 | 0.15 | 0.17 |
| D34 | Benign neoplasm of thyroid gland                                                                  | 148 | 147954 | 0.03 | 0.04 | 0.04 | 0.05 | 0.06 | 0.07 | 0.08 | 0.09 | 0.1  | 0.12 |
| D35 | Benign neoplasm of other and unspecified endocrine glands                                         | 744 | 147358 | 0.04 | 0.05 | 0.08 | 0.1  | 0.14 | 0.18 | 0.23 | 0.29 | 0.35 | 0.41 |
| D36 | Benign neoplasm of other and unspecified sites                                                    | 393 | 147709 | 0.03 | 0.04 | 0.06 | 0.07 | 0.09 | 0.12 | 0.14 | 0.17 | 0.21 | 0.24 |
| D37 | Neoplasm of uncertain or unknown behaviour of oral cavity and digestive organs                    | 826 | 147276 | 0.04 | 0.06 | 0.08 | 0.11 | 0.15 | 0.2  | 0.25 | 0.31 | 0.38 | 0.45 |
| D38 | Neoplasm of uncertain or unknown behaviour of middle ear and respiratory and intrathoracic organs | 130 | 147972 | 0.03 | 0.03 | 0.04 | 0.05 | 0.06 | 0.06 | 0.07 | 0.08 | 0.1  | 0.11 |
| D39 | Neoplasm of uncertain or unknown behaviour of female genital organs                               | 192 | 147910 | 0.03 | 0.04 | 0.05 | 0.05 | 0.06 | 0.08 | 0.09 | 0.11 | 0.12 | 0.14 |
| D41 | Neoplasm of uncertain or unknown behaviour of urinary organs                                      | 535 | 147567 | 0.03 | 0.05 | 0.06 | 0.09 | 0.11 | 0.14 | 0.18 | 0.22 | 0.26 | 0.32 |
| D43 | Neoplasm of uncertain or unknown behaviour of brain and central nervous system                    | 179 | 147923 | 0.03 | 0.04 | 0.04 | 0.05 | 0.06 | 0.07 | 0.09 | 0.1  | 0.12 | 0.13 |
| D44 | Neoplasm of uncertain or unknown behaviour of endocrine glands                                    | 143 | 147959 | 0.03 | 0.04 | 0.04 | 0.05 | 0.06 | 0.07 | 0.08 | 0.09 | 0.1  | 0.12 |
| D45 | Polycythaemia vera                                                                                | 237 | 147865 | 0.03 | 0.04 | 0.05 | 0.06 | 0.07 | 0.09 | 0.1  | 0.12 | 0.14 | 0.16 |
| D46 | Myelodysplastic syndromes                                                                         | 283 | 147819 | 0.03 | 0.04 | 0.05 | 0.06 | 0.08 | 0.09 | 0.11 | 0.14 | 0.16 | 0.19 |

|     |                                                                                                  |      |        |      |      |      |      |      |      |      |      |      |      |
|-----|--------------------------------------------------------------------------------------------------|------|--------|------|------|------|------|------|------|------|------|------|------|
| D47 | Other neoplasms of uncertain or unknown behaviour of lymphoid, haematopoietic and related tissue | 735  | 147367 | 0.04 | 0.05 | 0.07 | 0.1  | 0.14 | 0.18 | 0.23 | 0.28 | 0.34 | 0.41 |
| D48 | Neoplasm of uncertain or unknown behaviour of other and unspecified sites                        | 448  | 147654 | 0.03 | 0.05 | 0.06 | 0.08 | 0.1  | 0.13 | 0.16 | 0.19 | 0.23 | 0.27 |
| D50 | Iron deficiency anaemia                                                                          | 7239 | 140863 | 0.08 | 0.18 | 0.36 | 0.57 | 0.76 | 0.89 | 0.96 | 0.99 | 1    | 1    |
| D51 | Vitamin B12 deficiency anaemia                                                                   | 653  | 147449 | 0.04 | 0.05 | 0.07 | 0.1  | 0.13 | 0.16 | 0.21 | 0.26 | 0.31 | 0.37 |
| D52 | Folate deficiency anaemia                                                                        | 263  | 147839 | 0.03 | 0.04 | 0.05 | 0.06 | 0.07 | 0.09 | 0.11 | 0.13 | 0.15 | 0.18 |
| D56 | Thalassaemia                                                                                     | 41   | 148061 | 0.03 | 0.03 | 0.03 | 0.04 | 0.04 | 0.04 | 0.05 | 0.05 | 0.06 | 0.06 |
| D57 | Sickle-cell disorders                                                                            | 13   | 148089 | 0.03 | 0.03 | 0.03 | 0.03 | 0.03 | 0.03 | 0.04 | 0.04 | 0.04 | 0.04 |
| D59 | Acquired haemolytic anaemia                                                                      | 97   | 148005 | 0.03 | 0.03 | 0.04 | 0.04 | 0.05 | 0.06 | 0.06 | 0.07 | 0.08 | 0.09 |
| D61 | Other aplastic anaemias                                                                          | 458  | 147644 | 0.03 | 0.05 | 0.06 | 0.08 | 0.1  | 0.13 | 0.16 | 0.19 | 0.23 | 0.28 |
| D62 | Acute posthaemorrhagic anaemia                                                                   | 153  | 147949 | 0.03 | 0.04 | 0.04 | 0.05 | 0.06 | 0.07 | 0.08 | 0.09 | 0.11 | 0.12 |
| D63 | Anaemia in chronic diseases classified elsewhere                                                 | 596  | 147506 | 0.04 | 0.05 | 0.07 | 0.09 | 0.12 | 0.15 | 0.19 | 0.24 | 0.29 | 0.34 |
| D64 | Other anaemias                                                                                   | 9465 | 138637 | 0.09 | 0.23 | 0.44 | 0.67 | 0.85 | 0.95 | 0.99 | 1    | 1    | 1    |
| D68 | Other coagulation defects                                                                        | 654  | 147448 | 0.04 | 0.05 | 0.07 | 0.1  | 0.13 | 0.16 | 0.21 | 0.26 | 0.31 | 0.37 |
| D69 | Purpura and other haemorrhagic conditions                                                        | 1650 | 146452 | 0.04 | 0.07 | 0.12 | 0.18 | 0.25 | 0.34 | 0.44 | 0.54 | 0.64 | 0.73 |
| D70 | Agranulocytosis                                                                                  | 2425 | 145677 | 0.05 | 0.09 | 0.15 | 0.24 | 0.35 | 0.47 | 0.59 | 0.71 | 0.8  | 0.88 |
| D72 | Other disorders of white blood cells                                                             | 365  | 147737 | 0.03 | 0.04 | 0.06 | 0.07 | 0.09 | 0.11 | 0.13 | 0.16 | 0.19 | 0.23 |
| D73 | Diseases of spleen                                                                               | 443  | 147659 | 0.03 | 0.05 | 0.06 | 0.08 | 0.1  | 0.12 | 0.15 | 0.19 | 0.23 | 0.27 |
| D75 | Other diseases of blood and blood-forming organs                                                 | 493  | 147609 | 0.03 | 0.05 | 0.06 | 0.08 | 0.11 | 0.13 | 0.17 | 0.2  | 0.25 | 0.29 |
| D80 | Immunodeficiency with predominantly antibody defects                                             | 132  | 147970 | 0.03 | 0.03 | 0.04 | 0.05 | 0.06 | 0.06 | 0.07 | 0.09 | 0.1  | 0.11 |
| D86 | Sarcoidosis                                                                                      | 368  | 147734 | 0.03 | 0.04 | 0.06 | 0.07 | 0.09 | 0.11 | 0.14 | 0.16 | 0.2  | 0.23 |

|     |                                                                          |       |        |      |      |      |      |      |      |      |      |      |      |
|-----|--------------------------------------------------------------------------|-------|--------|------|------|------|------|------|------|------|------|------|------|
| D89 | Other disorders involving the immune mechanism, not elsewhere classified | 235   | 147867 | 0.03 | 0.04 | 0.05 | 0.06 | 0.07 | 0.09 | 0.1  | 0.12 | 0.14 | 0.16 |
| E03 | Other hypothyroidism                                                     | 9974  | 138128 | 0.09 | 0.23 | 0.46 | 0.7  | 0.87 | 0.96 | 0.99 | 1    | 1    | 1    |
| E04 | Other non-toxic goitre                                                   | 1161  | 146941 | 0.04 | 0.06 | 0.1  | 0.14 | 0.19 | 0.26 | 0.33 | 0.41 | 0.5  | 0.58 |
| E05 | Thyrotoxicosis [hyperthyroidism]                                         | 1374  | 146728 | 0.04 | 0.07 | 0.11 | 0.16 | 0.22 | 0.29 | 0.38 | 0.47 | 0.57 | 0.66 |
| E06 | Thyroiditis                                                              | 203   | 147899 | 0.03 | 0.04 | 0.05 | 0.06 | 0.07 | 0.08 | 0.09 | 0.11 | 0.13 | 0.15 |
| E07 | Other disorders of thyroid                                               | 336   | 147766 | 0.03 | 0.04 | 0.05 | 0.07 | 0.08 | 0.1  | 0.13 | 0.15 | 0.18 | 0.22 |
| E10 | Insulin-dependent diabetes mellitus                                      | 1626  | 146476 | 0.04 | 0.07 | 0.12 | 0.18 | 0.25 | 0.34 | 0.44 | 0.54 | 0.64 | 0.73 |
| E11 | Non-insulin-dependent diabetes mellitus                                  | 12929 | 135173 | 0.1  | 0.28 | 0.55 | 0.79 | 0.94 | 0.99 | 1    | 1    | 1    | 1    |
| E13 | Other specified diabetes mellitus                                        | 157   | 147945 | 0.03 | 0.04 | 0.04 | 0.05 | 0.06 | 0.07 | 0.08 | 0.09 | 0.11 | 0.12 |
| E14 | Unspecified diabetes mellitus                                            | 2095  | 146007 | 0.05 | 0.08 | 0.14 | 0.21 | 0.31 | 0.42 | 0.53 | 0.64 | 0.75 | 0.83 |
| E16 | Other disorders of pancreatic internal secretion                         | 1090  | 147012 | 0.04 | 0.06 | 0.09 | 0.13 | 0.18 | 0.24 | 0.31 | 0.39 | 0.47 | 0.56 |
| E21 | Hyperparathyroidism and other disorders of parathyroid gland             | 733   | 147369 | 0.04 | 0.05 | 0.07 | 0.1  | 0.14 | 0.18 | 0.23 | 0.28 | 0.34 | 0.41 |
| E22 | Hyperfunction of pituitary gland                                         | 304   | 147798 | 0.03 | 0.04 | 0.05 | 0.07 | 0.08 | 0.1  | 0.12 | 0.14 | 0.17 | 0.2  |
| E23 | Hypofunction and other disorders of pituitary gland                      | 279   | 147823 | 0.03 | 0.04 | 0.05 | 0.06 | 0.08 | 0.09 | 0.11 | 0.13 | 0.16 | 0.19 |
| E27 | Other disorders of adrenal gland                                         | 461   | 147641 | 0.03 | 0.05 | 0.06 | 0.08 | 0.1  | 0.13 | 0.16 | 0.19 | 0.23 | 0.28 |
| E28 | Ovarian dysfunction                                                      | 148   | 147954 | 0.03 | 0.04 | 0.04 | 0.05 | 0.06 | 0.07 | 0.08 | 0.09 | 0.1  | 0.12 |
| E29 | Testicular dysfunction                                                   | 119   | 147983 | 0.03 | 0.03 | 0.04 | 0.05 | 0.05 | 0.06 | 0.07 | 0.08 | 0.09 | 0.1  |
| E34 | Other endocrine disorders                                                | 98    | 148004 | 0.03 | 0.03 | 0.04 | 0.04 | 0.05 | 0.06 | 0.06 | 0.07 | 0.08 | 0.09 |
| E46 | Unspecified protein-energy malnutrition                                  | 186   | 147916 | 0.03 | 0.04 | 0.04 | 0.05 | 0.06 | 0.08 | 0.09 | 0.1  | 0.12 | 0.14 |
| E53 | Deficiency of other B group vitamins                                     | 1087  | 147015 | 0.04 | 0.06 | 0.09 | 0.13 | 0.18 | 0.24 | 0.31 | 0.39 | 0.47 | 0.56 |
| E55 | Vitamin D deficiency                                                     | 1533  | 146569 | 0.04 | 0.07 | 0.11 | 0.17 | 0.24 | 0.32 | 0.42 | 0.51 | 0.61 | 0.7  |
| E61 | Deficiency of other nutrient elements                                    | 372   | 147730 | 0.03 | 0.04 | 0.06 | 0.07 | 0.09 | 0.11 | 0.14 | 0.17 | 0.2  | 0.23 |
| E66 | Obesity                                                                  | 12149 | 135953 | 0.1  | 0.27 | 0.53 | 0.77 | 0.92 | 0.98 | 1    | 1    | 1    | 1    |

|     |                                                                                    |       |        |      |      |      |      |      |      |      |      |      |      |
|-----|------------------------------------------------------------------------------------|-------|--------|------|------|------|------|------|------|------|------|------|------|
| E73 | Lactose intolerance                                                                | 90    | 148012 | 0.03 | 0.03 | 0.04 | 0.04 | 0.05 | 0.06 | 0.06 | 0.07 | 0.08 | 0.09 |
| E78 | Disorders of lipoprotein metabolism and other lipidaemias                          | 26121 | 121981 | 0.15 | 0.47 | 0.8  | 0.96 | 1    | 1    | 1    | 1    | 1    | 1    |
| E80 | Disorders of porphyrin and bilirubin metabolism                                    | 379   | 147723 | 0.03 | 0.04 | 0.06 | 0.07 | 0.09 | 0.11 | 0.14 | 0.17 | 0.2  | 0.24 |
| E83 | Disorders of mineral metabolism                                                    | 2901  | 145201 | 0.05 | 0.1  | 0.17 | 0.28 | 0.4  | 0.54 | 0.67 | 0.78 | 0.87 | 0.93 |
| E85 | Amyloidosis                                                                        | 180   | 147922 | 0.03 | 0.04 | 0.04 | 0.05 | 0.06 | 0.07 | 0.09 | 0.1  | 0.12 | 0.14 |
| E86 | Volume depletion                                                                   | 3628  | 144474 | 0.06 | 0.12 | 0.21 | 0.33 | 0.48 | 0.63 | 0.76 | 0.86 | 0.93 | 0.97 |
| E87 | Other disorders of fluid, electrolyte and acid-base balance                        | 7859  | 140243 | 0.08 | 0.2  | 0.38 | 0.6  | 0.79 | 0.91 | 0.97 | 0.99 | 1    | 1    |
| E88 | Other metabolic disorders                                                          | 448   | 147654 | 0.03 | 0.05 | 0.06 | 0.08 | 0.1  | 0.13 | 0.16 | 0.19 | 0.23 | 0.27 |
| E89 | Postprocedural endocrine and metabolic disorders, not elsewhere classified         | 1067  | 147035 | 0.04 | 0.06 | 0.09 | 0.13 | 0.18 | 0.24 | 0.31 | 0.38 | 0.47 | 0.55 |
| F00 | Dementia in Alzheimer's disease                                                    | 833   | 147269 | 0.04 | 0.06 | 0.08 | 0.11 | 0.15 | 0.2  | 0.25 | 0.31 | 0.38 | 0.45 |
| F01 | Vascular dementia                                                                  | 626   | 147476 | 0.04 | 0.05 | 0.07 | 0.09 | 0.12 | 0.16 | 0.2  | 0.25 | 0.3  | 0.36 |
| F02 | Dementia in other diseases classified elsewhere                                    | 318   | 147784 | 0.03 | 0.04 | 0.05 | 0.07 | 0.08 | 0.1  | 0.12 | 0.15 | 0.18 | 0.21 |
| F03 | Unspecified dementia                                                               | 1444  | 146658 | 0.04 | 0.07 | 0.11 | 0.16 | 0.23 | 0.31 | 0.4  | 0.49 | 0.59 | 0.68 |
| F05 | Delirium, not induced by alcohol and other psychoactive substances                 | 2395  | 145707 | 0.05 | 0.09 | 0.15 | 0.24 | 0.34 | 0.46 | 0.59 | 0.7  | 0.8  | 0.87 |
| F06 | Other mental disorders due to brain damage and dysfunction and to physical disease | 428   | 147674 | 0.03 | 0.04 | 0.06 | 0.08 | 0.1  | 0.12 | 0.15 | 0.18 | 0.22 | 0.26 |
| F10 | Mental and behavioural disorders due to use of alcohol                             | 3692  | 144410 | 0.06 | 0.12 | 0.21 | 0.34 | 0.48 | 0.63 | 0.77 | 0.87 | 0.93 | 0.97 |
| F11 | Mental and behavioural disorders due to use of opioids                             | 65    | 148037 | 0.03 | 0.03 | 0.04 | 0.04 | 0.04 | 0.05 | 0.05 | 0.06 | 0.07 | 0.07 |

|     |                                                               |       |        |      |      |      |      |      |      |      |      |      |      |
|-----|---------------------------------------------------------------|-------|--------|------|------|------|------|------|------|------|------|------|------|
| F12 | Mental and behavioural disorders due to use of cannabinoids   | 96    | 148006 | 0.03 | 0.03 | 0.04 | 0.04 | 0.05 | 0.06 | 0.06 | 0.07 | 0.08 | 0.09 |
| F17 | Mental and behavioural disorders due to use of tobacco        | 8225  | 139877 | 0.08 | 0.2  | 0.39 | 0.62 | 0.81 | 0.92 | 0.98 | 0.99 | 1    | 1    |
| F20 | Schizophrenia                                                 | 320   | 147782 | 0.03 | 0.04 | 0.05 | 0.07 | 0.08 | 0.1  | 0.12 | 0.15 | 0.18 | 0.21 |
| F22 | Persistent delusional disorders                               | 153   | 147949 | 0.03 | 0.04 | 0.04 | 0.05 | 0.06 | 0.07 | 0.08 | 0.09 | 0.11 | 0.12 |
| F23 | Acute and transient psychotic disorders                       | 76    | 148026 | 0.03 | 0.03 | 0.04 | 0.04 | 0.05 | 0.05 | 0.06 | 0.07 | 0.07 | 0.08 |
| F25 | Schizoaffective disorders                                     | 81    | 148021 | 0.03 | 0.03 | 0.04 | 0.04 | 0.05 | 0.05 | 0.06 | 0.07 | 0.07 | 0.08 |
| F29 | Unspecified nonorganic psychosis                              | 138   | 147964 | 0.03 | 0.04 | 0.04 | 0.05 | 0.06 | 0.07 | 0.08 | 0.09 | 0.1  | 0.11 |
| F30 | Manic episode                                                 | 87    | 148015 | 0.03 | 0.03 | 0.04 | 0.04 | 0.05 | 0.05 | 0.06 | 0.07 | 0.08 | 0.09 |
| F31 | Bipolar affective disorder                                    | 604   | 147498 | 0.04 | 0.05 | 0.07 | 0.09 | 0.12 | 0.15 | 0.19 | 0.24 | 0.29 | 0.35 |
| F32 | Depressive episode                                            | 10163 | 137939 | 0.09 | 0.24 | 0.46 | 0.7  | 0.88 | 0.96 | 0.99 | 1    | 1    | 1    |
| F33 | Recurrent depressive disorder                                 | 400   | 147702 | 0.03 | 0.04 | 0.06 | 0.07 | 0.09 | 0.12 | 0.14 | 0.17 | 0.21 | 0.25 |
| F40 | Phobic anxiety disorders                                      | 745   | 147357 | 0.04 | 0.05 | 0.08 | 0.1  | 0.14 | 0.18 | 0.23 | 0.29 | 0.35 | 0.41 |
| F41 | Other anxiety disorders                                       | 7479  | 140623 | 0.08 | 0.19 | 0.37 | 0.58 | 0.77 | 0.9  | 0.97 | 0.99 | 1    | 1    |
| F42 | Obsessive-compulsive disorder                                 | 120   | 147982 | 0.03 | 0.03 | 0.04 | 0.05 | 0.05 | 0.06 | 0.07 | 0.08 | 0.09 | 0.1  |
| F43 | Reaction to severe stress, and adjustment disorders           | 411   | 147691 | 0.03 | 0.04 | 0.06 | 0.07 | 0.09 | 0.12 | 0.15 | 0.18 | 0.21 | 0.25 |
| F44 | Dissociative [conversion] disorders                           | 98    | 148004 | 0.03 | 0.03 | 0.04 | 0.04 | 0.05 | 0.06 | 0.06 | 0.07 | 0.08 | 0.09 |
| F45 | Somatoform disorders                                          | 248   | 147854 | 0.03 | 0.04 | 0.05 | 0.06 | 0.07 | 0.09 | 0.1  | 0.12 | 0.15 | 0.17 |
| F52 | Sexual dysfunction, not caused by organic disorder or disease | 255   | 147847 | 0.03 | 0.04 | 0.05 | 0.06 | 0.07 | 0.09 | 0.11 | 0.13 | 0.15 | 0.17 |
| F60 | Specific personality disorders                                | 203   | 147899 | 0.03 | 0.04 | 0.05 | 0.06 | 0.07 | 0.08 | 0.09 | 0.11 | 0.13 | 0.15 |
| F81 | Specific developmental disorders of scholastic skills         | 107   | 147995 | 0.03 | 0.03 | 0.04 | 0.05 | 0.05 | 0.06 | 0.07 | 0.08 | 0.09 | 0.1  |
| F99 | Mental disorder, not otherwise specified                      | 117   | 147985 | 0.03 | 0.03 | 0.04 | 0.05 | 0.05 | 0.06 | 0.07 | 0.08 | 0.09 | 0.1  |

|     |                                                                         |      |        |      |      |      |      |      |      |      |      |      |      |
|-----|-------------------------------------------------------------------------|------|--------|------|------|------|------|------|------|------|------|------|------|
| G04 | Encephalitis, myelitis and encephalomyelitis                            | 158  | 147944 | 0.03 | 0.04 | 0.04 | 0.05 | 0.06 | 0.07 | 0.08 | 0.09 | 0.11 | 0.12 |
| G11 | Hereditary ataxia                                                       | 104  | 147998 | 0.03 | 0.03 | 0.04 | 0.04 | 0.05 | 0.06 | 0.07 | 0.08 | 0.08 | 0.1  |
| G12 | Spinal muscular atrophy and related syndromes                           | 246  | 147856 | 0.03 | 0.04 | 0.05 | 0.06 | 0.07 | 0.09 | 0.1  | 0.12 | 0.15 | 0.17 |
| G20 | Parkinson's disease                                                     | 1378 | 146724 | 0.04 | 0.07 | 0.11 | 0.16 | 0.22 | 0.29 | 0.38 | 0.47 | 0.57 | 0.66 |
| G23 | Other degenerative diseases of basal ganglia                            | 108  | 147994 | 0.03 | 0.03 | 0.04 | 0.05 | 0.05 | 0.06 | 0.07 | 0.08 | 0.09 | 0.1  |
| G24 | Dystonia                                                                | 210  | 147892 | 0.03 | 0.04 | 0.05 | 0.06 | 0.07 | 0.08 | 0.09 | 0.11 | 0.13 | 0.15 |
| G25 | Other extrapyramidal and movement disorders                             | 839  | 147263 | 0.04 | 0.06 | 0.08 | 0.11 | 0.15 | 0.2  | 0.25 | 0.32 | 0.38 | 0.46 |
| G30 | Alzheimer's disease                                                     | 1163 | 146939 | 0.04 | 0.06 | 0.1  | 0.14 | 0.19 | 0.26 | 0.33 | 0.41 | 0.5  | 0.59 |
| G31 | Other degenerative diseases of nervous system, not elsewhere classified | 929  | 147173 | 0.04 | 0.06 | 0.08 | 0.12 | 0.16 | 0.21 | 0.27 | 0.34 | 0.42 | 0.49 |
| G35 | Multiple sclerosis                                                      | 783  | 147319 | 0.04 | 0.05 | 0.08 | 0.11 | 0.14 | 0.19 | 0.24 | 0.3  | 0.36 | 0.43 |
| G37 | Other demyelinating diseases of central nervous system                  | 159  | 147943 | 0.03 | 0.04 | 0.04 | 0.05 | 0.06 | 0.07 | 0.08 | 0.09 | 0.11 | 0.12 |
| G40 | Epilepsy                                                                | 2411 | 145691 | 0.05 | 0.09 | 0.15 | 0.24 | 0.34 | 0.46 | 0.59 | 0.7  | 0.8  | 0.88 |
| G41 | Status epilepticus                                                      | 129  | 147973 | 0.03 | 0.03 | 0.04 | 0.05 | 0.06 | 0.06 | 0.07 | 0.08 | 0.1  | 0.11 |
| G43 | Migraine                                                                | 2463 | 145639 | 0.05 | 0.09 | 0.16 | 0.24 | 0.35 | 0.47 | 0.6  | 0.71 | 0.81 | 0.88 |
| G44 | Other headache syndromes                                                | 425  | 147677 | 0.03 | 0.04 | 0.06 | 0.08 | 0.1  | 0.12 | 0.15 | 0.18 | 0.22 | 0.26 |
| G45 | Transient cerebral ischaemic attacks and related syndromes              | 1969 | 146133 | 0.05 | 0.08 | 0.13 | 0.2  | 0.29 | 0.39 | 0.51 | 0.62 | 0.72 | 0.81 |
| G47 | Sleep disorders                                                         | 3883 | 144219 | 0.06 | 0.12 | 0.22 | 0.35 | 0.5  | 0.66 | 0.79 | 0.88 | 0.94 | 0.98 |
| G50 | Disorders of trigeminal nerve                                           | 376  | 147726 | 0.03 | 0.04 | 0.06 | 0.07 | 0.09 | 0.11 | 0.14 | 0.17 | 0.2  | 0.24 |
| G51 | Facial nerve disorders                                                  | 641  | 147461 | 0.04 | 0.05 | 0.07 | 0.09 | 0.12 | 0.16 | 0.2  | 0.25 | 0.31 | 0.37 |
| G53 | Cranial nerve disorders in diseases classified elsewhere                | 88   | 148014 | 0.03 | 0.03 | 0.04 | 0.04 | 0.05 | 0.05 | 0.06 | 0.07 | 0.08 | 0.09 |
| G54 | Nerve root and plexus disorders                                         | 252  | 147850 | 0.03 | 0.04 | 0.05 | 0.06 | 0.07 | 0.09 | 0.11 | 0.13 | 0.15 | 0.17 |

|     |                                                                      |      |        |      |      |      |      |      |      |      |      |      |      |
|-----|----------------------------------------------------------------------|------|--------|------|------|------|------|------|------|------|------|------|------|
| G55 | Nerve root and plexus compressions in diseases classified elsewhere  | 3097 | 145005 | 0.05 | 0.1  | 0.18 | 0.29 | 0.42 | 0.56 | 0.69 | 0.81 | 0.89 | 0.94 |
| G56 | Mononeuropathies of upper limb                                       | 5977 | 142125 | 0.07 | 0.16 | 0.31 | 0.49 | 0.68 | 0.83 | 0.92 | 0.97 | 0.99 | 1    |
| G57 | Mononeuropathies of lower limb                                       | 964  | 147138 | 0.04 | 0.06 | 0.09 | 0.12 | 0.17 | 0.22 | 0.28 | 0.35 | 0.43 | 0.51 |
| G58 | Other mononeuropathies                                               | 242  | 147860 | 0.03 | 0.04 | 0.05 | 0.06 | 0.07 | 0.09 | 0.1  | 0.12 | 0.14 | 0.17 |
| G59 | Mononeuropathy in diseases classified elsewhere                      | 111  | 147991 | 0.03 | 0.03 | 0.04 | 0.05 | 0.05 | 0.06 | 0.07 | 0.08 | 0.09 | 0.1  |
| G60 | Hereditary and idiopathic neuropathy                                 | 128  | 147974 | 0.03 | 0.03 | 0.04 | 0.05 | 0.06 | 0.06 | 0.07 | 0.08 | 0.1  | 0.11 |
| G61 | Inflammatory polyneuropathy                                          | 190  | 147912 | 0.03 | 0.04 | 0.05 | 0.05 | 0.06 | 0.08 | 0.09 | 0.1  | 0.12 | 0.14 |
| G62 | Other polyneuropathies                                               | 1392 | 146710 | 0.04 | 0.07 | 0.11 | 0.16 | 0.22 | 0.3  | 0.38 | 0.48 | 0.57 | 0.66 |
| G63 | Polyneuropathy in diseases classified elsewhere                      | 440  | 147662 | 0.03 | 0.05 | 0.06 | 0.08 | 0.1  | 0.12 | 0.15 | 0.19 | 0.23 | 0.27 |
| G70 | Myasthenia gravis and other myoneural disorders                      | 164  | 147938 | 0.03 | 0.04 | 0.04 | 0.05 | 0.06 | 0.07 | 0.08 | 0.1  | 0.11 | 0.13 |
| G71 | Primary disorders of muscles                                         | 101  | 148001 | 0.03 | 0.03 | 0.04 | 0.04 | 0.05 | 0.06 | 0.07 | 0.07 | 0.08 | 0.09 |
| G72 | Other myopathies                                                     | 141  | 147961 | 0.03 | 0.04 | 0.04 | 0.05 | 0.06 | 0.07 | 0.08 | 0.09 | 0.1  | 0.12 |
| G80 | Infantile cerebral palsy                                             | 86   | 148016 | 0.03 | 0.03 | 0.04 | 0.04 | 0.05 | 0.05 | 0.06 | 0.07 | 0.08 | 0.09 |
| G81 | Hemiplegia                                                           | 1468 | 146634 | 0.04 | 0.07 | 0.11 | 0.16 | 0.23 | 0.31 | 0.4  | 0.5  | 0.59 | 0.68 |
| G82 | Paraplegia and tetraplegia                                           | 234  | 147868 | 0.03 | 0.04 | 0.05 | 0.06 | 0.07 | 0.08 | 0.1  | 0.12 | 0.14 | 0.16 |
| G83 | Other paralytic syndromes                                            | 345  | 147757 | 0.03 | 0.04 | 0.05 | 0.07 | 0.09 | 0.11 | 0.13 | 0.16 | 0.19 | 0.22 |
| G90 | Disorders of autonomic nervous system                                | 227  | 147875 | 0.03 | 0.04 | 0.05 | 0.06 | 0.07 | 0.08 | 0.1  | 0.12 | 0.14 | 0.16 |
| G91 | Hydrocephalus                                                        | 380  | 147722 | 0.03 | 0.04 | 0.06 | 0.07 | 0.09 | 0.11 | 0.14 | 0.17 | 0.2  | 0.24 |
| G93 | Other disorders of brain                                             | 1525 | 146577 | 0.04 | 0.07 | 0.11 | 0.17 | 0.24 | 0.32 | 0.41 | 0.51 | 0.61 | 0.7  |
| G95 | Other diseases of spinal cord                                        | 492  | 147610 | 0.03 | 0.05 | 0.06 | 0.08 | 0.11 | 0.13 | 0.17 | 0.2  | 0.25 | 0.29 |
| G96 | Other disorders of central nervous system                            | 204  | 147898 | 0.03 | 0.04 | 0.05 | 0.06 | 0.07 | 0.08 | 0.09 | 0.11 | 0.13 | 0.15 |
| G97 | Postprocedural disorders of nervous system, not elsewhere classified | 120  | 147982 | 0.03 | 0.03 | 0.04 | 0.05 | 0.05 | 0.06 | 0.07 | 0.08 | 0.09 | 0.1  |

|     |                                                                    |       |        |      |      |      |      |      |      |      |      |      |      |
|-----|--------------------------------------------------------------------|-------|--------|------|------|------|------|------|------|------|------|------|------|
| G99 | Other disorders of nervous system in diseases classified elsewhere | 898   | 147204 | 0.04 | 0.06 | 0.08 | 0.12 | 0.16 | 0.21 | 0.27 | 0.33 | 0.41 | 0.48 |
| H00 | Hordeolum and chalazion                                            | 969   | 147133 | 0.04 | 0.06 | 0.09 | 0.12 | 0.17 | 0.22 | 0.28 | 0.36 | 0.43 | 0.51 |
| H01 | Other inflammation of eyelid                                       | 583   | 147519 | 0.04 | 0.05 | 0.07 | 0.09 | 0.12 | 0.15 | 0.19 | 0.23 | 0.28 | 0.34 |
| H02 | Other disorders of eyelid                                          | 3684  | 144418 | 0.06 | 0.12 | 0.21 | 0.34 | 0.48 | 0.63 | 0.77 | 0.87 | 0.93 | 0.97 |
| H04 | Disorders of lachrymal system                                      | 1604  | 146498 | 0.04 | 0.07 | 0.12 | 0.17 | 0.25 | 0.33 | 0.43 | 0.53 | 0.63 | 0.72 |
| H05 | Disorders of orbit                                                 | 187   | 147915 | 0.03 | 0.04 | 0.04 | 0.05 | 0.06 | 0.08 | 0.09 | 0.1  | 0.12 | 0.14 |
| H10 | Conjunctivitis                                                     | 237   | 147865 | 0.03 | 0.04 | 0.05 | 0.06 | 0.07 | 0.09 | 0.1  | 0.12 | 0.14 | 0.16 |
| H11 | Other disorders of conjunctiva                                     | 576   | 147526 | 0.04 | 0.05 | 0.07 | 0.09 | 0.12 | 0.15 | 0.19 | 0.23 | 0.28 | 0.33 |
| H16 | Keratitis                                                          | 210   | 147892 | 0.03 | 0.04 | 0.05 | 0.06 | 0.07 | 0.08 | 0.09 | 0.11 | 0.13 | 0.15 |
| H17 | Corneal scars and opacities                                        | 134   | 147968 | 0.03 | 0.04 | 0.04 | 0.05 | 0.06 | 0.06 | 0.07 | 0.09 | 0.1  | 0.11 |
| H18 | Other disorders of cornea                                          | 1226  | 146876 | 0.04 | 0.07 | 0.1  | 0.14 | 0.2  | 0.27 | 0.35 | 0.43 | 0.52 | 0.61 |
| H20 | Iridocyclitis                                                      | 292   | 147810 | 0.03 | 0.04 | 0.05 | 0.06 | 0.08 | 0.1  | 0.12 | 0.14 | 0.16 | 0.19 |
| H21 | Other disorders of iris and ciliary body                           | 331   | 147771 | 0.03 | 0.04 | 0.05 | 0.07 | 0.08 | 0.1  | 0.13 | 0.15 | 0.18 | 0.21 |
| H25 | Senile cataract                                                    | 10654 | 137448 | 0.09 | 0.25 | 0.48 | 0.72 | 0.89 | 0.97 | 0.99 | 1    | 1    | 1    |
| H26 | Other cataract                                                     | 13462 | 134640 | 0.11 | 0.29 | 0.57 | 0.81 | 0.94 | 0.99 | 1    | 1    | 1    | 1    |
| H27 | Other disorders of lens                                            | 237   | 147865 | 0.03 | 0.04 | 0.05 | 0.06 | 0.07 | 0.09 | 0.1  | 0.12 | 0.14 | 0.16 |
| H31 | Other disorders of choroid                                         | 204   | 147898 | 0.03 | 0.04 | 0.05 | 0.06 | 0.07 | 0.08 | 0.09 | 0.11 | 0.13 | 0.15 |
| H33 | Retinal detachments and breaks                                     | 2071  | 146031 | 0.05 | 0.08 | 0.14 | 0.21 | 0.3  | 0.41 | 0.53 | 0.64 | 0.74 | 0.82 |
| H34 | Retinal vascular occlusions                                        | 527   | 147575 | 0.03 | 0.05 | 0.06 | 0.08 | 0.11 | 0.14 | 0.18 | 0.22 | 0.26 | 0.31 |
| H35 | Other retinal disorders                                            | 4077  | 144025 | 0.06 | 0.12 | 0.23 | 0.36 | 0.52 | 0.68 | 0.81 | 0.9  | 0.95 | 0.98 |
| H36 | Retinal disorders in diseases classified elsewhere                 | 1236  | 146866 | 0.04 | 0.07 | 0.1  | 0.14 | 0.2  | 0.27 | 0.35 | 0.43 | 0.52 | 0.61 |
| H40 | Glaucoma                                                           | 4560  | 143542 | 0.06 | 0.13 | 0.25 | 0.4  | 0.57 | 0.72 | 0.85 | 0.93 | 0.97 | 0.99 |
| H43 | Disorders of vitreous body                                         | 1322  | 146780 | 0.04 | 0.07 | 0.1  | 0.15 | 0.21 | 0.28 | 0.37 | 0.46 | 0.55 | 0.64 |
| H44 | Disorders of globe                                                 | 328   | 147774 | 0.03 | 0.04 | 0.05 | 0.07 | 0.08 | 0.1  | 0.13 | 0.15 | 0.18 | 0.21 |

|     |                                                                      |      |        |      |      |      |      |      |      |      |      |      |      |
|-----|----------------------------------------------------------------------|------|--------|------|------|------|------|------|------|------|------|------|------|
| H47 | Other disorders of optic [2nd] nerve and visual pathways             | 318  | 147784 | 0.03 | 0.04 | 0.05 | 0.07 | 0.08 | 0.1  | 0.12 | 0.15 | 0.18 | 0.21 |
| H49 | Paralytic strabismus                                                 | 262  | 147840 | 0.03 | 0.04 | 0.05 | 0.06 | 0.07 | 0.09 | 0.11 | 0.13 | 0.15 | 0.18 |
| H50 | Other strabismus                                                     | 576  | 147526 | 0.04 | 0.05 | 0.07 | 0.09 | 0.12 | 0.15 | 0.19 | 0.23 | 0.28 | 0.33 |
| H52 | Disorders of refraction and accommodation                            | 3406 | 144696 | 0.06 | 0.11 | 0.2  | 0.31 | 0.45 | 0.6  | 0.73 | 0.84 | 0.91 | 0.96 |
| H53 | Visual disturbances                                                  | 2560 | 145542 | 0.05 | 0.09 | 0.16 | 0.25 | 0.36 | 0.49 | 0.61 | 0.73 | 0.82 | 0.89 |
| H54 | Blindness and low vision                                             | 971  | 147131 | 0.04 | 0.06 | 0.09 | 0.12 | 0.17 | 0.22 | 0.29 | 0.36 | 0.43 | 0.51 |
| H55 | Nystagmus and other irregular eye movements                          | 189  | 147913 | 0.03 | 0.04 | 0.04 | 0.05 | 0.06 | 0.08 | 0.09 | 0.1  | 0.12 | 0.14 |
| H57 | Other disorders of eye and adnexa                                    | 460  | 147642 | 0.03 | 0.05 | 0.06 | 0.08 | 0.1  | 0.13 | 0.16 | 0.19 | 0.23 | 0.28 |
| H59 | Postprocedural disorders of eye and adnexa, not elsewhere classified | 212  | 147890 | 0.03 | 0.04 | 0.05 | 0.06 | 0.07 | 0.08 | 0.1  | 0.11 | 0.13 | 0.15 |
| H60 | Otitis externa                                                       | 364  | 147738 | 0.03 | 0.04 | 0.06 | 0.07 | 0.09 | 0.11 | 0.13 | 0.16 | 0.19 | 0.23 |
| H61 | Other disorders of external ear                                      | 600  | 147502 | 0.04 | 0.05 | 0.07 | 0.09 | 0.12 | 0.15 | 0.19 | 0.24 | 0.29 | 0.35 |
| H65 | Nonsuppurative otitis media                                          | 584  | 147518 | 0.04 | 0.05 | 0.07 | 0.09 | 0.12 | 0.15 | 0.19 | 0.23 | 0.28 | 0.34 |
| H66 | Suppurative and unspecified otitis media                             | 479  | 147623 | 0.03 | 0.05 | 0.06 | 0.08 | 0.1  | 0.13 | 0.16 | 0.2  | 0.24 | 0.29 |
| H69 | Other disorders of Eustachian tube                                   | 111  | 147991 | 0.03 | 0.03 | 0.04 | 0.05 | 0.05 | 0.06 | 0.07 | 0.08 | 0.09 | 0.1  |
| H71 | Cholesteatoma of middle ear                                          | 218  | 147884 | 0.03 | 0.04 | 0.05 | 0.06 | 0.07 | 0.08 | 0.1  | 0.11 | 0.13 | 0.15 |
| H72 | Perforation of tympanic membrane                                     | 503  | 147599 | 0.03 | 0.05 | 0.06 | 0.08 | 0.11 | 0.14 | 0.17 | 0.21 | 0.25 | 0.3  |
| H73 | Other disorders of tympanic membrane                                 | 189  | 147913 | 0.03 | 0.04 | 0.04 | 0.05 | 0.06 | 0.08 | 0.09 | 0.1  | 0.12 | 0.14 |
| H74 | Other disorders of middle ear and mastoid                            | 234  | 147868 | 0.03 | 0.04 | 0.05 | 0.06 | 0.07 | 0.08 | 0.1  | 0.12 | 0.14 | 0.16 |
| H80 | Otosclerosis                                                         | 169  | 147933 | 0.03 | 0.04 | 0.04 | 0.05 | 0.06 | 0.07 | 0.08 | 0.1  | 0.11 | 0.13 |
| H81 | Disorders of vestibular function                                     | 1084 | 147018 | 0.04 | 0.06 | 0.09 | 0.13 | 0.18 | 0.24 | 0.31 | 0.39 | 0.47 | 0.56 |
| H83 | Other diseases of inner ear                                          | 553  | 147549 | 0.04 | 0.05 | 0.07 | 0.09 | 0.11 | 0.14 | 0.18 | 0.22 | 0.27 | 0.32 |
| H90 | Conductive and sensorineural hearing loss                            | 1057 | 147045 | 0.04 | 0.06 | 0.09 | 0.13 | 0.18 | 0.24 | 0.31 | 0.38 | 0.46 | 0.55 |
| H91 | Other hearing loss                                                   | 3768 | 144334 | 0.06 | 0.12 | 0.21 | 0.34 | 0.49 | 0.64 | 0.78 | 0.87 | 0.94 | 0.97 |
| H92 | Otalgia and effusion of ear                                          | 318  | 147784 | 0.03 | 0.04 | 0.05 | 0.07 | 0.08 | 0.1  | 0.12 | 0.15 | 0.18 | 0.21 |

|     |                                                  |       |        |      |      |      |      |      |      |      |      |      |      |
|-----|--------------------------------------------------|-------|--------|------|------|------|------|------|------|------|------|------|------|
| H93 | Other disorders of ear, not elsewhere classified | 646   | 147456 | 0.04 | 0.05 | 0.07 | 0.1  | 0.13 | 0.16 | 0.21 | 0.25 | 0.31 | 0.37 |
| I05 | Rheumatic mitral valve diseases                  | 284   | 147818 | 0.03 | 0.04 | 0.05 | 0.06 | 0.08 | 0.09 | 0.11 | 0.14 | 0.16 | 0.19 |
| I07 | Rheumatic tricuspid valve diseases               | 472   | 147630 | 0.03 | 0.05 | 0.06 | 0.08 | 0.1  | 0.13 | 0.16 | 0.2  | 0.24 | 0.28 |
| I08 | Multiple valve diseases                          | 2621  | 145481 | 0.05 | 0.1  | 0.16 | 0.25 | 0.37 | 0.5  | 0.62 | 0.74 | 0.83 | 0.9  |
| I10 | Essential (primary) hypertension                 | 51976 | 96126  | 0.22 | 0.65 | 0.94 | 1    | 1    | 1    | 1    | 1    | 1    | 1    |
| I11 | Hypertensive heart disease                       | 325   | 147777 | 0.03 | 0.04 | 0.05 | 0.07 | 0.08 | 0.1  | 0.12 | 0.15 | 0.18 | 0.21 |
| I12 | Hypertensive renal disease                       | 709   | 147393 | 0.04 | 0.05 | 0.07 | 0.1  | 0.13 | 0.17 | 0.22 | 0.27 | 0.33 | 0.4  |
| I15 | Secondary hypertension                           | 83    | 148019 | 0.03 | 0.03 | 0.04 | 0.04 | 0.05 | 0.05 | 0.06 | 0.07 | 0.08 | 0.08 |
| I20 | Angina pectoris                                  | 11145 | 136957 | 0.1  | 0.25 | 0.5  | 0.74 | 0.9  | 0.97 | 1    | 1    | 1    | 1    |
| I21 | Acute myocardial infarction                      | 6201  | 141901 | 0.07 | 0.17 | 0.32 | 0.51 | 0.69 | 0.84 | 0.93 | 0.98 | 0.99 | 1    |
| I22 | Subsequent myocardial infarction                 | 340   | 147762 | 0.03 | 0.04 | 0.05 | 0.07 | 0.09 | 0.11 | 0.13 | 0.15 | 0.18 | 0.22 |
| I24 | Other acute ischaemic heart diseases             | 1441  | 146661 | 0.04 | 0.07 | 0.11 | 0.16 | 0.23 | 0.31 | 0.39 | 0.49 | 0.59 | 0.68 |
| I25 | Chronic ischaemic heart disease                  | 17899 | 130203 | 0.12 | 0.36 | 0.67 | 0.89 | 0.98 | 1    | 1    | 1    | 1    | 1    |
| I26 | Pulmonary embolism                               | 3297  | 144805 | 0.06 | 0.11 | 0.19 | 0.31 | 0.44 | 0.59 | 0.72 | 0.83 | 0.91 | 0.95 |
| I27 | Other pulmonary heart diseases                   | 968   | 147134 | 0.04 | 0.06 | 0.09 | 0.12 | 0.17 | 0.22 | 0.28 | 0.36 | 0.43 | 0.51 |
| I30 | Acute pericarditis                               | 135   | 147967 | 0.03 | 0.04 | 0.04 | 0.05 | 0.06 | 0.07 | 0.08 | 0.09 | 0.1  | 0.11 |
| I31 | Other diseases of pericardium                    | 1138  | 146964 | 0.04 | 0.06 | 0.09 | 0.14 | 0.19 | 0.25 | 0.32 | 0.41 | 0.49 | 0.58 |
| I33 | Acute and subacute endocarditis                  | 194   | 147908 | 0.03 | 0.04 | 0.05 | 0.05 | 0.06 | 0.08 | 0.09 | 0.11 | 0.12 | 0.14 |
| I34 | Nonrheumatic mitral valve disorders              | 2435  | 145667 | 0.05 | 0.09 | 0.15 | 0.24 | 0.35 | 0.47 | 0.59 | 0.71 | 0.81 | 0.88 |
| I35 | Nonrheumatic aortic valve disorders              | 2742  | 145360 | 0.05 | 0.1  | 0.17 | 0.26 | 0.38 | 0.51 | 0.64 | 0.76 | 0.85 | 0.91 |
| I36 | Nonrheumatic tricuspid valve disorders           | 169   | 147933 | 0.03 | 0.04 | 0.04 | 0.05 | 0.06 | 0.07 | 0.08 | 0.1  | 0.11 | 0.13 |
| I37 | Pulmonary valve disorders                        | 225   | 147877 | 0.03 | 0.04 | 0.05 | 0.06 | 0.07 | 0.08 | 0.1  | 0.12 | 0.14 | 0.16 |
| I38 | Endocarditis, valve unspecified                  | 362   | 147740 | 0.03 | 0.04 | 0.06 | 0.07 | 0.09 | 0.11 | 0.13 | 0.16 | 0.19 | 0.23 |
| I42 | Cardiomyopathy                                   | 1155  | 146947 | 0.04 | 0.06 | 0.1  | 0.14 | 0.19 | 0.25 | 0.33 | 0.41 | 0.5  | 0.58 |
| I44 | Atrioventricular and left bundle-branch block    | 4212  | 143890 | 0.06 | 0.13 | 0.23 | 0.37 | 0.54 | 0.69 | 0.82 | 0.91 | 0.96 | 0.98 |
| I45 | Other conduction disorders                       | 2597  | 145505 | 0.05 | 0.09 | 0.16 | 0.25 | 0.37 | 0.49 | 0.62 | 0.73 | 0.83 | 0.9  |

|     |                                                                                      |       |        |      |      |      |      |      |      |      |      |      |      |
|-----|--------------------------------------------------------------------------------------|-------|--------|------|------|------|------|------|------|------|------|------|------|
| I46 | Cardiac arrest                                                                       | 1026  | 147076 | 0.04 | 0.06 | 0.09 | 0.13 | 0.17 | 0.23 | 0.3  | 0.37 | 0.45 | 0.53 |
| I47 | Paroxysmal tachycardia                                                               | 2397  | 145705 | 0.05 | 0.09 | 0.15 | 0.24 | 0.34 | 0.46 | 0.59 | 0.7  | 0.8  | 0.87 |
| I48 | Atrial fibrillation and flutter                                                      | 13042 | 135060 | 0.1  | 0.29 | 0.55 | 0.8  | 0.94 | 0.99 | 1    | 1    | 1    | 1    |
| I49 | Other cardiac arrhythmias                                                            | 2781  | 145321 | 0.05 | 0.1  | 0.17 | 0.27 | 0.39 | 0.52 | 0.65 | 0.76 | 0.85 | 0.92 |
| I50 | Heart failure                                                                        | 6099  | 142003 | 0.07 | 0.16 | 0.31 | 0.5  | 0.69 | 0.84 | 0.93 | 0.97 | 0.99 | 1    |
| I51 | Complications and ill-defined descriptions of heart disease                          | 5800  | 142302 | 0.07 | 0.16 | 0.3  | 0.48 | 0.67 | 0.82 | 0.92 | 0.97 | 0.99 | 1    |
| I60 | Subarachnoid haemorrhage                                                             | 581   | 147521 | 0.04 | 0.05 | 0.07 | 0.09 | 0.12 | 0.15 | 0.19 | 0.23 | 0.28 | 0.34 |
| I61 | Intracerebral haemorrhage                                                            | 751   | 147351 | 0.04 | 0.05 | 0.08 | 0.1  | 0.14 | 0.18 | 0.23 | 0.29 | 0.35 | 0.42 |
| I62 | Other nontraumatic intracranial haemorrhage                                          | 447   | 147655 | 0.03 | 0.05 | 0.06 | 0.08 | 0.1  | 0.13 | 0.16 | 0.19 | 0.23 | 0.27 |
| I63 | Cerebral infarction                                                                  | 3183  | 144919 | 0.05 | 0.11 | 0.19 | 0.3  | 0.43 | 0.57 | 0.71 | 0.82 | 0.9  | 0.95 |
| I64 | Stroke, not specified as haemorrhage or infarction                                   | 974   | 147128 | 0.04 | 0.06 | 0.09 | 0.12 | 0.17 | 0.22 | 0.29 | 0.36 | 0.43 | 0.51 |
| I65 | Occlusion and stenosis of precerebral arteries, not resulting in cerebral infarction | 964   | 147138 | 0.04 | 0.06 | 0.09 | 0.12 | 0.17 | 0.22 | 0.28 | 0.35 | 0.43 | 0.51 |
| I67 | Other cerebrovascular diseases                                                       | 3400  | 144702 | 0.06 | 0.11 | 0.2  | 0.31 | 0.45 | 0.6  | 0.73 | 0.84 | 0.91 | 0.96 |
| I69 | Sequelae of cerebrovascular disease                                                  | 1193  | 146909 | 0.04 | 0.06 | 0.1  | 0.14 | 0.2  | 0.26 | 0.34 | 0.42 | 0.51 | 0.6  |
| I70 | Atherosclerosis                                                                      | 1257  | 146845 | 0.04 | 0.07 | 0.1  | 0.15 | 0.2  | 0.27 | 0.35 | 0.44 | 0.53 | 0.62 |
| I71 | Aortic aneurysm and dissection                                                       | 1576  | 146526 | 0.04 | 0.07 | 0.11 | 0.17 | 0.24 | 0.33 | 0.42 | 0.53 | 0.62 | 0.72 |
| I72 | Other aneurysm                                                                       | 457   | 147645 | 0.03 | 0.05 | 0.06 | 0.08 | 0.1  | 0.13 | 0.16 | 0.19 | 0.23 | 0.28 |
| I73 | Other peripheral vascular diseases                                                   | 3154  | 144948 | 0.05 | 0.11 | 0.19 | 0.3  | 0.43 | 0.57 | 0.7  | 0.81 | 0.89 | 0.94 |
| I74 | Arterial embolism and thrombosis                                                     | 678   | 147424 | 0.04 | 0.05 | 0.07 | 0.1  | 0.13 | 0.17 | 0.21 | 0.26 | 0.32 | 0.38 |
| I77 | Other disorders of arteries and arterioles                                           | 1097  | 147005 | 0.04 | 0.06 | 0.09 | 0.13 | 0.18 | 0.24 | 0.32 | 0.39 | 0.48 | 0.56 |
| I78 | Diseases of capillaries                                                              | 482   | 147620 | 0.03 | 0.05 | 0.06 | 0.08 | 0.1  | 0.13 | 0.16 | 0.2  | 0.24 | 0.29 |
| I80 | Phlebitis and thrombophlebitis                                                       | 2906  | 145196 | 0.05 | 0.1  | 0.17 | 0.28 | 0.4  | 0.54 | 0.67 | 0.78 | 0.87 | 0.93 |
| I81 | Portal vein thrombosis                                                               | 157   | 147945 | 0.03 | 0.04 | 0.04 | 0.05 | 0.06 | 0.07 | 0.08 | 0.09 | 0.11 | 0.12 |

|     |                                                                          |       |        |      |      |      |      |      |      |      |      |      |      |
|-----|--------------------------------------------------------------------------|-------|--------|------|------|------|------|------|------|------|------|------|------|
| I82 | Other venous embolism and thrombosis                                     | 333   | 147769 | 0.03 | 0.04 | 0.05 | 0.07 | 0.08 | 0.1  | 0.13 | 0.15 | 0.18 | 0.21 |
| I83 | Varicose veins of lower extremities                                      | 6190  | 141912 | 0.07 | 0.17 | 0.32 | 0.5  | 0.69 | 0.84 | 0.93 | 0.98 | 0.99 | 1    |
| I84 | Haemorrhoids                                                             | 10852 | 137250 | 0.09 | 0.25 | 0.49 | 0.73 | 0.89 | 0.97 | 0.99 | 1    | 1    | 1    |
| I85 | Oesophageal varices                                                      | 427   | 147675 | 0.03 | 0.04 | 0.06 | 0.08 | 0.1  | 0.12 | 0.15 | 0.18 | 0.22 | 0.26 |
| I86 | Varicose veins of other sites                                            | 335   | 147767 | 0.03 | 0.04 | 0.05 | 0.07 | 0.08 | 0.1  | 0.13 | 0.15 | 0.18 | 0.21 |
| I87 | Other disorders of veins                                                 | 476   | 147626 | 0.03 | 0.05 | 0.06 | 0.08 | 0.1  | 0.13 | 0.16 | 0.2  | 0.24 | 0.29 |
| I89 | Other non-infective disorders of lymphatic vessels and lymph nodes       | 790   | 147312 | 0.04 | 0.05 | 0.08 | 0.11 | 0.14 | 0.19 | 0.24 | 0.3  | 0.37 | 0.43 |
| I95 | Hypotension                                                              | 6117  | 141985 | 0.07 | 0.16 | 0.31 | 0.5  | 0.69 | 0.84 | 0.93 | 0.98 | 0.99 | 1    |
| I97 | Postprocedural disorders of circulatory system, not elsewhere classified | 136   | 147966 | 0.03 | 0.04 | 0.04 | 0.05 | 0.06 | 0.07 | 0.08 | 0.09 | 0.1  | 0.11 |
| I98 | Other disorders of circulatory system in diseases classified elsewhere   | 213   | 147889 | 0.03 | 0.04 | 0.05 | 0.06 | 0.07 | 0.08 | 0.1  | 0.11 | 0.13 | 0.15 |
| I99 | Other and unspecified disorders of circulatory system                    | 134   | 147968 | 0.03 | 0.04 | 0.04 | 0.05 | 0.06 | 0.06 | 0.07 | 0.09 | 0.1  | 0.11 |
| J00 | Acute nasopharyngitis [common cold]                                      | 300   | 147802 | 0.03 | 0.04 | 0.05 | 0.06 | 0.08 | 0.1  | 0.12 | 0.14 | 0.17 | 0.2  |
| J01 | Acute sinusitis                                                          | 106   | 147996 | 0.03 | 0.03 | 0.04 | 0.04 | 0.05 | 0.06 | 0.07 | 0.08 | 0.09 | 0.1  |
| J02 | Acute pharyngitis                                                        | 636   | 147466 | 0.04 | 0.05 | 0.07 | 0.09 | 0.12 | 0.16 | 0.2  | 0.25 | 0.31 | 0.36 |
| J03 | Acute tonsillitis                                                        | 314   | 147788 | 0.03 | 0.04 | 0.05 | 0.07 | 0.08 | 0.1  | 0.12 | 0.15 | 0.17 | 0.2  |
| J04 | Acute laryngitis and tracheitis                                          | 96    | 148006 | 0.03 | 0.03 | 0.04 | 0.04 | 0.05 | 0.06 | 0.06 | 0.07 | 0.08 | 0.09 |
| J06 | Acute upper respiratory infections of multiple and unspecified sites     | 570   | 147532 | 0.04 | 0.05 | 0.07 | 0.09 | 0.12 | 0.15 | 0.19 | 0.23 | 0.28 | 0.33 |
| J10 | Influenza due to identified influenza virus                              | 497   | 147605 | 0.03 | 0.05 | 0.06 | 0.08 | 0.11 | 0.13 | 0.17 | 0.21 | 0.25 | 0.3  |
| J11 | Influenza, virus not identified                                          | 140   | 147962 | 0.03 | 0.04 | 0.04 | 0.05 | 0.06 | 0.07 | 0.08 | 0.09 | 0.1  | 0.11 |
| J12 | Viral pneumonia, not elsewhere classified                                | 857   | 147245 | 0.04 | 0.06 | 0.08 | 0.11 | 0.15 | 0.2  | 0.26 | 0.32 | 0.39 | 0.46 |
| J13 | Pneumonia due to Streptococcus pneumoniae                                | 178   | 147924 | 0.03 | 0.04 | 0.04 | 0.05 | 0.06 | 0.07 | 0.09 | 0.1  | 0.12 | 0.13 |

|     |                                                              |       |        |      |      |      |      |      |      |      |      |      |      |
|-----|--------------------------------------------------------------|-------|--------|------|------|------|------|------|------|------|------|------|------|
| J15 | Bacterial pneumonia, not elsewhere classified                | 428   | 147674 | 0.03 | 0.04 | 0.06 | 0.08 | 0.1  | 0.12 | 0.15 | 0.18 | 0.22 | 0.26 |
| J17 | Pneumonia in diseases classified elsewhere                   | 134   | 147968 | 0.03 | 0.04 | 0.04 | 0.05 | 0.06 | 0.06 | 0.07 | 0.09 | 0.1  | 0.11 |
| J18 | Pneumonia, organism unspecified                              | 9751  | 138351 | 0.09 | 0.23 | 0.45 | 0.69 | 0.86 | 0.96 | 0.99 | 1    | 1    | 1    |
| J20 | Acute bronchitis                                             | 118   | 147984 | 0.03 | 0.03 | 0.04 | 0.05 | 0.05 | 0.06 | 0.07 | 0.08 | 0.09 | 0.1  |
| J22 | Unspecified acute lower respiratory infection                | 6190  | 141912 | 0.07 | 0.17 | 0.32 | 0.5  | 0.69 | 0.84 | 0.93 | 0.98 | 0.99 | 1    |
| J30 | Vasomotor and allergic rhinitis                              | 1562  | 146540 | 0.04 | 0.07 | 0.11 | 0.17 | 0.24 | 0.33 | 0.42 | 0.52 | 0.62 | 0.71 |
| J31 | Chronic rhinitis, nasopharyngitis and pharyngitis            | 611   | 147491 | 0.04 | 0.05 | 0.07 | 0.09 | 0.12 | 0.16 | 0.2  | 0.24 | 0.3  | 0.35 |
| J32 | Chronic sinusitis                                            | 1566  | 146536 | 0.04 | 0.07 | 0.11 | 0.17 | 0.24 | 0.33 | 0.42 | 0.52 | 0.62 | 0.71 |
| J33 | Nasal polyp                                                  | 1700  | 146402 | 0.04 | 0.08 | 0.12 | 0.18 | 0.26 | 0.35 | 0.45 | 0.56 | 0.66 | 0.75 |
| J34 | Other disorders of nose and nasal sinuses                    | 3518  | 144584 | 0.06 | 0.11 | 0.2  | 0.32 | 0.47 | 0.61 | 0.75 | 0.85 | 0.92 | 0.96 |
| J35 | Chronic diseases of tonsils and adenoids                     | 587   | 147515 | 0.04 | 0.05 | 0.07 | 0.09 | 0.12 | 0.15 | 0.19 | 0.24 | 0.29 | 0.34 |
| J36 | Peritonsillar abscess                                        | 238   | 147864 | 0.03 | 0.04 | 0.05 | 0.06 | 0.07 | 0.09 | 0.1  | 0.12 | 0.14 | 0.17 |
| J38 | Diseases of vocal cords and larynx, not elsewhere classified | 1074  | 147028 | 0.04 | 0.06 | 0.09 | 0.13 | 0.18 | 0.24 | 0.31 | 0.39 | 0.47 | 0.55 |
| J39 | Other diseases of upper respiratory tract                    | 501   | 147601 | 0.03 | 0.05 | 0.06 | 0.08 | 0.11 | 0.14 | 0.17 | 0.21 | 0.25 | 0.3  |
| J40 | Bronchitis, not specified as acute or chronic                | 461   | 147641 | 0.03 | 0.05 | 0.06 | 0.08 | 0.1  | 0.13 | 0.16 | 0.19 | 0.23 | 0.28 |
| J42 | Unspecified chronic bronchitis                               | 206   | 147896 | 0.03 | 0.04 | 0.05 | 0.06 | 0.07 | 0.08 | 0.09 | 0.11 | 0.13 | 0.15 |
| J43 | Emphysema                                                    | 1704  | 146398 | 0.04 | 0.08 | 0.12 | 0.18 | 0.26 | 0.35 | 0.45 | 0.56 | 0.66 | 0.75 |
| J44 | Other chronic obstructive pulmonary disease                  | 7466  | 140636 | 0.08 | 0.19 | 0.37 | 0.58 | 0.77 | 0.9  | 0.97 | 0.99 | 1    | 1    |
| J45 | Asthma                                                       | 16080 | 132022 | 0.12 | 0.33 | 0.63 | 0.87 | 0.97 | 1    | 1    | 1    | 1    | 1    |
| J46 | Status asthmaticus                                           | 135   | 147967 | 0.03 | 0.04 | 0.04 | 0.05 | 0.06 | 0.07 | 0.08 | 0.09 | 0.1  | 0.11 |
| J47 | Bronchiectasis                                               | 1937  | 146165 | 0.05 | 0.08 | 0.13 | 0.2  | 0.29 | 0.39 | 0.5  | 0.61 | 0.71 | 0.8  |
| J61 | Pneumoconiosis due to asbestos and other mineral fibres      | 195   | 147907 | 0.03 | 0.04 | 0.05 | 0.05 | 0.07 | 0.08 | 0.09 | 0.11 | 0.12 | 0.14 |
| J69 | Pneumonitis due to solids and liquids                        | 1191  | 146911 | 0.04 | 0.06 | 0.1  | 0.14 | 0.2  | 0.26 | 0.34 | 0.42 | 0.51 | 0.6  |

|     |                                                                |      |        |      |      |      |      |      |      |      |      |      |      |
|-----|----------------------------------------------------------------|------|--------|------|------|------|------|------|------|------|------|------|------|
| J80 | Adult respiratory distress syndrome                            | 151  | 147951 | 0.03 | 0.04 | 0.04 | 0.05 | 0.06 | 0.07 | 0.08 | 0.09 | 0.11 | 0.12 |
| J81 | Pulmonary oedema                                               | 388  | 147714 | 0.03 | 0.04 | 0.06 | 0.07 | 0.09 | 0.11 | 0.14 | 0.17 | 0.2  | 0.24 |
| J84 | Other interstitial pulmonary diseases                          | 1297 | 146805 | 0.04 | 0.07 | 0.1  | 0.15 | 0.21 | 0.28 | 0.36 | 0.45 | 0.54 | 0.63 |
| J86 | Pyothorax                                                      | 244  | 147858 | 0.03 | 0.04 | 0.05 | 0.06 | 0.07 | 0.09 | 0.1  | 0.12 | 0.14 | 0.17 |
| J90 | Pleural effusion, not elsewhere classified                     | 5396 | 142706 | 0.07 | 0.15 | 0.28 | 0.45 | 0.64 | 0.79 | 0.9  | 0.96 | 0.99 | 1    |
| J91 | Pleural effusion in conditions classified elsewhere            | 188  | 147914 | 0.03 | 0.04 | 0.04 | 0.05 | 0.06 | 0.08 | 0.09 | 0.1  | 0.12 | 0.14 |
| J92 | Pleural plaque                                                 | 811  | 147291 | 0.04 | 0.06 | 0.08 | 0.11 | 0.15 | 0.19 | 0.25 | 0.31 | 0.37 | 0.44 |
| J93 | Pneumothorax                                                   | 735  | 147367 | 0.04 | 0.05 | 0.07 | 0.1  | 0.14 | 0.18 | 0.23 | 0.28 | 0.34 | 0.41 |
| J94 | Other pleural conditions                                       | 253  | 147849 | 0.03 | 0.04 | 0.05 | 0.06 | 0.07 | 0.09 | 0.11 | 0.13 | 0.15 | 0.17 |
| J95 | Postprocedural respiratory disorders, not elsewhere classified | 296  | 147806 | 0.03 | 0.04 | 0.05 | 0.06 | 0.08 | 0.1  | 0.12 | 0.14 | 0.17 | 0.2  |
| J96 | Respiratory failure, not elsewhere classified                  | 2818 | 145284 | 0.05 | 0.1  | 0.17 | 0.27 | 0.39 | 0.52 | 0.65 | 0.77 | 0.86 | 0.92 |
| J98 | Other respiratory disorders                                    | 4490 | 143612 | 0.06 | 0.13 | 0.24 | 0.39 | 0.56 | 0.72 | 0.84 | 0.92 | 0.97 | 0.99 |
| J99 | Respiratory disorders in diseases classified elsewhere         | 177  | 147925 | 0.03 | 0.04 | 0.04 | 0.05 | 0.06 | 0.07 | 0.09 | 0.1  | 0.12 | 0.13 |
| K00 | Disorders of tooth development and eruption                    | 297  | 147805 | 0.03 | 0.04 | 0.05 | 0.06 | 0.08 | 0.1  | 0.12 | 0.14 | 0.17 | 0.2  |
| K01 | Embedded and impacted teeth                                    | 877  | 147225 | 0.04 | 0.06 | 0.08 | 0.11 | 0.16 | 0.2  | 0.26 | 0.33 | 0.4  | 0.47 |
| K02 | Dental caries                                                  | 1918 | 146184 | 0.05 | 0.08 | 0.13 | 0.2  | 0.29 | 0.39 | 0.5  | 0.61 | 0.71 | 0.8  |
| K04 | Diseases of pulp and periapical tissues                        | 1343 | 146759 | 0.04 | 0.07 | 0.1  | 0.15 | 0.21 | 0.29 | 0.37 | 0.46 | 0.56 | 0.65 |
| K05 | Gingivitis and periodontal diseases                            | 495  | 147607 | 0.03 | 0.05 | 0.06 | 0.08 | 0.11 | 0.13 | 0.17 | 0.21 | 0.25 | 0.3  |
| K06 | Other disorders of gingiva and edentulous alveolar ridge       | 196  | 147906 | 0.03 | 0.04 | 0.05 | 0.05 | 0.07 | 0.08 | 0.09 | 0.11 | 0.12 | 0.14 |
| K07 | Dentofacial anomalies [including malocclusion]                 | 343  | 147759 | 0.03 | 0.04 | 0.05 | 0.07 | 0.09 | 0.11 | 0.13 | 0.16 | 0.19 | 0.22 |
| K08 | Other disorders of teeth and supporting structures             | 1672 | 146430 | 0.04 | 0.08 | 0.12 | 0.18 | 0.26 | 0.35 | 0.45 | 0.55 | 0.65 | 0.74 |

|     |                                                |       |        |      |      |      |      |      |      |      |      |      |      |
|-----|------------------------------------------------|-------|--------|------|------|------|------|------|------|------|------|------|------|
| K09 | Cysts of oral region, not elsewhere classified | 229   | 147873 | 0.03 | 0.04 | 0.05 | 0.06 | 0.07 | 0.08 | 0.1  | 0.12 | 0.14 | 0.16 |
| K10 | Other diseases of jaws                         | 241   | 147861 | 0.03 | 0.04 | 0.05 | 0.06 | 0.07 | 0.09 | 0.1  | 0.12 | 0.14 | 0.17 |
| K11 | Diseases of salivary glands                    | 624   | 147478 | 0.04 | 0.05 | 0.07 | 0.09 | 0.12 | 0.16 | 0.2  | 0.25 | 0.3  | 0.36 |
| K12 | Stomatitis and related lesions                 | 762   | 147340 | 0.04 | 0.05 | 0.08 | 0.1  | 0.14 | 0.18 | 0.23 | 0.29 | 0.35 | 0.42 |
| K13 | Other diseases of lip and oral mucosa          | 1864  | 146238 | 0.05 | 0.08 | 0.13 | 0.19 | 0.28 | 0.38 | 0.49 | 0.59 | 0.7  | 0.78 |
| K14 | Diseases of tongue                             | 825   | 147277 | 0.04 | 0.06 | 0.08 | 0.11 | 0.15 | 0.2  | 0.25 | 0.31 | 0.38 | 0.45 |
| K20 | Oesophagitis                                   | 5713  | 142389 | 0.07 | 0.16 | 0.3  | 0.48 | 0.66 | 0.81 | 0.91 | 0.97 | 0.99 | 1    |
| K21 | Gastro-oesophageal reflux disease              | 18830 | 129272 | 0.13 | 0.38 | 0.69 | 0.91 | 0.98 | 1    | 1    | 1    | 1    | 1    |
| K22 | Other diseases of oesophagus                   | 7146  | 140956 | 0.08 | 0.18 | 0.35 | 0.56 | 0.75 | 0.89 | 0.96 | 0.99 | 1    | 1    |
| K25 | Gastric ulcer                                  | 2963  | 145139 | 0.05 | 0.1  | 0.18 | 0.28 | 0.41 | 0.54 | 0.68 | 0.79 | 0.87 | 0.93 |
| K26 | Duodenal ulcer                                 | 1981  | 146121 | 0.05 | 0.08 | 0.13 | 0.2  | 0.29 | 0.4  | 0.51 | 0.62 | 0.72 | 0.81 |
| K27 | Peptic ulcer, site unspecified                 | 283   | 147819 | 0.03 | 0.04 | 0.05 | 0.06 | 0.08 | 0.09 | 0.11 | 0.14 | 0.16 | 0.19 |
| K29 | Gastritis and duodenitis                       | 19152 | 128950 | 0.13 | 0.38 | 0.7  | 0.91 | 0.99 | 1    | 1    | 1    | 1    | 1    |
| K30 | Dyspepsia                                      | 6153  | 141949 | 0.07 | 0.16 | 0.31 | 0.5  | 0.69 | 0.84 | 0.93 | 0.98 | 0.99 | 1    |
| K31 | Other diseases of stomach and duodenum         | 6373  | 141729 | 0.07 | 0.17 | 0.32 | 0.52 | 0.71 | 0.85 | 0.94 | 0.98 | 0.99 | 1    |
| K35 | Acute appendicitis                             | 1813  | 146289 | 0.05 | 0.08 | 0.13 | 0.19 | 0.27 | 0.37 | 0.47 | 0.58 | 0.68 | 0.77 |
| K37 | Unspecified appendicitis                       | 256   | 147846 | 0.03 | 0.04 | 0.05 | 0.06 | 0.07 | 0.09 | 0.11 | 0.13 | 0.15 | 0.17 |
| K38 | Other diseases of appendix                     | 209   | 147893 | 0.03 | 0.04 | 0.05 | 0.06 | 0.07 | 0.08 | 0.09 | 0.11 | 0.13 | 0.15 |
| K40 | Inguinal hernia                                | 9614  | 138488 | 0.09 | 0.23 | 0.44 | 0.68 | 0.86 | 0.95 | 0.99 | 1    | 1    | 1    |
| K41 | Femoral hernia                                 | 450   | 147652 | 0.03 | 0.05 | 0.06 | 0.08 | 0.1  | 0.13 | 0.16 | 0.19 | 0.23 | 0.27 |
| K42 | Umbilical hernia                               | 2478  | 145624 | 0.05 | 0.09 | 0.16 | 0.24 | 0.35 | 0.47 | 0.6  | 0.72 | 0.81 | 0.89 |
| K43 | Ventral hernia                                 | 2145  | 145957 | 0.05 | 0.09 | 0.14 | 0.22 | 0.31 | 0.42 | 0.54 | 0.65 | 0.75 | 0.84 |
| K44 | Diaphragmatic hernia                           | 18516 | 129586 | 0.13 | 0.37 | 0.69 | 0.9  | 0.98 | 1    | 1    | 1    | 1    | 1    |
| K45 | Other abdominal hernia                         | 94    | 148008 | 0.03 | 0.03 | 0.04 | 0.04 | 0.05 | 0.06 | 0.06 | 0.07 | 0.08 | 0.09 |
| K46 | Unspecified abdominal hernia                   | 305   | 147797 | 0.03 | 0.04 | 0.05 | 0.07 | 0.08 | 0.1  | 0.12 | 0.14 | 0.17 | 0.2  |
| K50 | Crohn's disease [regional enteritis]           | 1016  | 147086 | 0.04 | 0.06 | 0.09 | 0.13 | 0.17 | 0.23 | 0.3  | 0.37 | 0.45 | 0.53 |

|     |                                                           |       |        |      |      |      |      |      |      |      |      |      |      |
|-----|-----------------------------------------------------------|-------|--------|------|------|------|------|------|------|------|------|------|------|
| K51 | Ulcerative colitis                                        | 1810  | 146292 | 0.05 | 0.08 | 0.13 | 0.19 | 0.27 | 0.37 | 0.47 | 0.58 | 0.68 | 0.77 |
| K52 | Other non-infective gastro-enteritis and colitis          | 8772  | 139330 | 0.08 | 0.21 | 0.41 | 0.64 | 0.83 | 0.94 | 0.98 | 1    | 1    | 1    |
| K55 | Vascular disorders of intestine                           | 1091  | 147011 | 0.04 | 0.06 | 0.09 | 0.13 | 0.18 | 0.24 | 0.31 | 0.39 | 0.47 | 0.56 |
| K56 | Paralytic ileus and intestinal obstruction without hernia | 3397  | 144705 | 0.06 | 0.11 | 0.2  | 0.31 | 0.45 | 0.6  | 0.73 | 0.84 | 0.91 | 0.96 |
| K57 | Diverticular disease of intestine                         | 22706 | 125396 | 0.14 | 0.43 | 0.76 | 0.94 | 0.99 | 1    | 1    | 1    | 1    | 1    |
| K58 | Irritable bowel syndrome                                  | 4201  | 143901 | 0.06 | 0.13 | 0.23 | 0.37 | 0.53 | 0.69 | 0.82 | 0.91 | 0.96 | 0.98 |
| K59 | Other functional intestinal disorders                     | 10519 | 137583 | 0.09 | 0.24 | 0.48 | 0.72 | 0.89 | 0.97 | 0.99 | 1    | 1    | 1    |
| K60 | Fissure and fistula of anal and rectal regions            | 1710  | 146392 | 0.04 | 0.08 | 0.12 | 0.18 | 0.26 | 0.35 | 0.45 | 0.56 | 0.66 | 0.75 |
| K61 | Abscess of anal and rectal regions                        | 714   | 147388 | 0.04 | 0.05 | 0.07 | 0.1  | 0.13 | 0.17 | 0.22 | 0.28 | 0.34 | 0.4  |
| K62 | Other diseases of anus and rectum                         | 13741 | 134361 | 0.11 | 0.3  | 0.57 | 0.82 | 0.95 | 0.99 | 1    | 1    | 1    | 1    |
| K63 | Other diseases of intestine                               | 11901 | 136201 | 0.1  | 0.27 | 0.52 | 0.76 | 0.92 | 0.98 | 1    | 1    | 1    | 1    |
| K64 | Haemorrhoids and perianal venous thrombosis               | 6561  | 141541 | 0.07 | 0.17 | 0.33 | 0.53 | 0.72 | 0.86 | 0.94 | 0.98 | 1    | 1    |
| K65 | Peritonitis                                               | 692   | 147410 | 0.04 | 0.05 | 0.07 | 0.1  | 0.13 | 0.17 | 0.22 | 0.27 | 0.33 | 0.39 |
| K66 | Other disorders of peritoneum                             | 3014  | 145088 | 0.05 | 0.1  | 0.18 | 0.28 | 0.41 | 0.55 | 0.68 | 0.79 | 0.88 | 0.94 |
| K70 | Alcoholic liver disease                                   | 635   | 147467 | 0.04 | 0.05 | 0.07 | 0.09 | 0.12 | 0.16 | 0.2  | 0.25 | 0.3  | 0.36 |
| K72 | Hepatic failure, not elsewhere classified                 | 422   | 147680 | 0.03 | 0.04 | 0.06 | 0.08 | 0.1  | 0.12 | 0.15 | 0.18 | 0.22 | 0.26 |
| K73 | Chronic hepatitis, not elsewhere classified               | 86    | 148016 | 0.03 | 0.03 | 0.04 | 0.04 | 0.05 | 0.05 | 0.06 | 0.07 | 0.08 | 0.09 |
| K74 | Fibrosis and cirrhosis of liver                           | 846   | 147256 | 0.04 | 0.06 | 0.08 | 0.11 | 0.15 | 0.2  | 0.25 | 0.32 | 0.39 | 0.46 |
| K75 | Other inflammatory liver diseases                         | 650   | 147452 | 0.04 | 0.05 | 0.07 | 0.1  | 0.13 | 0.16 | 0.21 | 0.26 | 0.31 | 0.37 |
| K76 | Other diseases of liver                                   | 3913  | 144189 | 0.06 | 0.12 | 0.22 | 0.35 | 0.51 | 0.66 | 0.79 | 0.89 | 0.94 | 0.98 |
| K80 | Cholelithiasis                                            | 9355  | 138747 | 0.09 | 0.22 | 0.44 | 0.67 | 0.85 | 0.95 | 0.99 | 1    | 1    | 1    |
| K81 | Cholecystitis                                             | 1780  | 146322 | 0.05 | 0.08 | 0.12 | 0.19 | 0.27 | 0.36 | 0.47 | 0.57 | 0.68 | 0.77 |
| K82 | Other diseases of gallbladder                             | 1298  | 146804 | 0.04 | 0.07 | 0.1  | 0.15 | 0.21 | 0.28 | 0.36 | 0.45 | 0.54 | 0.63 |
| K83 | Other diseases of biliary tract                           | 1816  | 146286 | 0.05 | 0.08 | 0.13 | 0.19 | 0.27 | 0.37 | 0.48 | 0.58 | 0.68 | 0.77 |
| K85 | Acute pancreatitis                                        | 1400  | 146702 | 0.04 | 0.07 | 0.11 | 0.16 | 0.22 | 0.3  | 0.39 | 0.48 | 0.57 | 0.66 |

|     |                                                                           |      |        |      |      |      |      |      |      |      |      |      |      |
|-----|---------------------------------------------------------------------------|------|--------|------|------|------|------|------|------|------|------|------|------|
| K86 | Other diseases of pancreas                                                | 1110 | 146992 | 0.04 | 0.06 | 0.09 | 0.13 | 0.18 | 0.25 | 0.32 | 0.4  | 0.48 | 0.57 |
| K90 | Intestinal malabsorption                                                  | 1324 | 146778 | 0.04 | 0.07 | 0.1  | 0.15 | 0.21 | 0.28 | 0.37 | 0.46 | 0.55 | 0.64 |
| K91 | Postprocedural disorders of digestive system,<br>not elsewhere classified | 1212 | 146890 | 0.04 | 0.06 | 0.1  | 0.14 | 0.2  | 0.27 | 0.34 | 0.43 | 0.52 | 0.6  |
| K92 | Other diseases of digestive system                                        | 7664 | 140438 | 0.08 | 0.19 | 0.37 | 0.59 | 0.78 | 0.91 | 0.97 | 0.99 | 1    | 1    |
| L02 | Cutaneous abscess, furuncle and carbuncle                                 | 1387 | 146715 | 0.04 | 0.07 | 0.11 | 0.16 | 0.22 | 0.3  | 0.38 | 0.48 | 0.57 | 0.66 |
| L03 | Cellulitis                                                                | 5311 | 142791 | 0.07 | 0.15 | 0.28 | 0.45 | 0.63 | 0.78 | 0.89 | 0.96 | 0.98 | 1    |
| L05 | Pilonidal cyst                                                            | 280  | 147822 | 0.03 | 0.04 | 0.05 | 0.06 | 0.08 | 0.09 | 0.11 | 0.13 | 0.16 | 0.19 |
| L08 | Other local infections of skin and subcutaneous<br>tissue                 | 1124 | 146978 | 0.04 | 0.06 | 0.09 | 0.13 | 0.19 | 0.25 | 0.32 | 0.4  | 0.49 | 0.57 |
| L20 | Atopic dermatitis                                                         | 97   | 148005 | 0.03 | 0.03 | 0.04 | 0.04 | 0.05 | 0.06 | 0.06 | 0.07 | 0.08 | 0.09 |
| L24 | Irritant contact dermatitis                                               | 258  | 147844 | 0.03 | 0.04 | 0.05 | 0.06 | 0.07 | 0.09 | 0.11 | 0.13 | 0.15 | 0.18 |
| L27 | Dermatitis due to substances taken internally                             | 395  | 147707 | 0.03 | 0.04 | 0.06 | 0.07 | 0.09 | 0.12 | 0.14 | 0.17 | 0.21 | 0.25 |
| L28 | Lichen simplex chronicus and prurigo                                      | 164  | 147938 | 0.03 | 0.04 | 0.04 | 0.05 | 0.06 | 0.07 | 0.08 | 0.1  | 0.11 | 0.13 |
| L29 | Pruritus                                                                  | 565  | 147537 | 0.04 | 0.05 | 0.07 | 0.09 | 0.11 | 0.15 | 0.18 | 0.23 | 0.28 | 0.33 |
| L30 | Other dermatitis                                                          | 1631 | 146471 | 0.04 | 0.07 | 0.12 | 0.18 | 0.25 | 0.34 | 0.44 | 0.54 | 0.64 | 0.73 |
| L40 | Psoriasis                                                                 | 1930 | 146172 | 0.05 | 0.08 | 0.13 | 0.2  | 0.29 | 0.39 | 0.5  | 0.61 | 0.71 | 0.8  |
| L43 | Lichen planus                                                             | 421  | 147681 | 0.03 | 0.04 | 0.06 | 0.08 | 0.1  | 0.12 | 0.15 | 0.18 | 0.22 | 0.26 |
| L50 | Urticaria                                                                 | 270  | 147832 | 0.03 | 0.04 | 0.05 | 0.06 | 0.08 | 0.09 | 0.11 | 0.13 | 0.16 | 0.18 |
| L53 | Other erythematous conditions                                             | 475  | 147627 | 0.03 | 0.05 | 0.06 | 0.08 | 0.1  | 0.13 | 0.16 | 0.2  | 0.24 | 0.29 |
| L57 | Skin changes due to chronic exposure to<br>nonionising radiation          | 2156 | 145946 | 0.05 | 0.09 | 0.14 | 0.22 | 0.31 | 0.42 | 0.54 | 0.66 | 0.76 | 0.84 |
| L60 | Nail disorders                                                            | 722  | 147380 | 0.04 | 0.05 | 0.07 | 0.1  | 0.14 | 0.18 | 0.22 | 0.28 | 0.34 | 0.4  |
| L65 | Other nonscarring hair loss                                               | 79   | 148023 | 0.03 | 0.03 | 0.04 | 0.04 | 0.05 | 0.05 | 0.06 | 0.07 | 0.07 | 0.08 |
| L71 | Rosacea                                                                   | 287  | 147815 | 0.03 | 0.04 | 0.05 | 0.06 | 0.08 | 0.1  | 0.11 | 0.14 | 0.16 | 0.19 |
| L72 | Follicular cysts of skin and subcutaneous tissue                          | 4511 | 143591 | 0.06 | 0.13 | 0.25 | 0.4  | 0.56 | 0.72 | 0.84 | 0.92 | 0.97 | 0.99 |

|     |                                                                           |       |        |      |      |      |      |      |      |      |      |      |      |
|-----|---------------------------------------------------------------------------|-------|--------|------|------|------|------|------|------|------|------|------|------|
| L73 | Other follicular disorders                                                | 248   | 147854 | 0.03 | 0.04 | 0.05 | 0.06 | 0.07 | 0.09 | 0.1  | 0.12 | 0.15 | 0.17 |
| L81 | Other disorders of pigmentation                                           | 568   | 147534 | 0.04 | 0.05 | 0.07 | 0.09 | 0.12 | 0.15 | 0.19 | 0.23 | 0.28 | 0.33 |
| L82 | Seborrhoeic keratosis                                                     | 2213  | 145889 | 0.05 | 0.09 | 0.14 | 0.22 | 0.32 | 0.43 | 0.55 | 0.67 | 0.77 | 0.85 |
| L84 | Corns and callosities                                                     | 192   | 147910 | 0.03 | 0.04 | 0.05 | 0.05 | 0.06 | 0.08 | 0.09 | 0.11 | 0.12 | 0.14 |
| L85 | Other epidermal thickening                                                | 567   | 147535 | 0.04 | 0.05 | 0.07 | 0.09 | 0.12 | 0.15 | 0.19 | 0.23 | 0.28 | 0.33 |
| L89 | Decubitus ulcer                                                           | 1680  | 146422 | 0.04 | 0.08 | 0.12 | 0.18 | 0.26 | 0.35 | 0.45 | 0.55 | 0.65 | 0.74 |
| L90 | Atrophic disorders of skin                                                | 1668  | 146434 | 0.04 | 0.07 | 0.12 | 0.18 | 0.25 | 0.34 | 0.44 | 0.55 | 0.65 | 0.74 |
| L91 | Hypertrophic disorders of skin                                            | 569   | 147533 | 0.04 | 0.05 | 0.07 | 0.09 | 0.12 | 0.15 | 0.19 | 0.23 | 0.28 | 0.33 |
| L92 | Granulomatous disorders of skin and subcutaneous tissue                   | 327   | 147775 | 0.03 | 0.04 | 0.05 | 0.07 | 0.08 | 0.1  | 0.12 | 0.15 | 0.18 | 0.21 |
| L93 | Lupus erythematosus                                                       | 90    | 148012 | 0.03 | 0.03 | 0.04 | 0.04 | 0.05 | 0.06 | 0.06 | 0.07 | 0.08 | 0.09 |
| L94 | Other localised connective tissue disorders                               | 93    | 148009 | 0.03 | 0.03 | 0.04 | 0.04 | 0.05 | 0.06 | 0.06 | 0.07 | 0.08 | 0.09 |
| L95 | Vasculitis limited to skin, not elsewhere classified                      | 93    | 148009 | 0.03 | 0.03 | 0.04 | 0.04 | 0.05 | 0.06 | 0.06 | 0.07 | 0.08 | 0.09 |
| L97 | Ulcer of lower limb, not elsewhere classified                             | 1184  | 146918 | 0.04 | 0.06 | 0.1  | 0.14 | 0.19 | 0.26 | 0.34 | 0.42 | 0.51 | 0.59 |
| L98 | Other disorders of skin and subcutaneous tissue, not elsewhere classified | 4240  | 143862 | 0.06 | 0.13 | 0.23 | 0.38 | 0.54 | 0.69 | 0.82 | 0.91 | 0.96 | 0.98 |
| M00 | Pyogenic arthritis                                                        | 298   | 147804 | 0.03 | 0.04 | 0.05 | 0.06 | 0.08 | 0.1  | 0.12 | 0.14 | 0.17 | 0.2  |
| M05 | Seropositive rheumatoid arthritis                                         | 446   | 147656 | 0.03 | 0.05 | 0.06 | 0.08 | 0.1  | 0.13 | 0.16 | 0.19 | 0.23 | 0.27 |
| M06 | Other rheumatoid arthritis                                                | 3165  | 144937 | 0.05 | 0.11 | 0.19 | 0.3  | 0.43 | 0.57 | 0.7  | 0.81 | 0.89 | 0.95 |
| M07 | Psoriatic and enteropathic arthropathies                                  | 510   | 147592 | 0.03 | 0.05 | 0.06 | 0.08 | 0.11 | 0.14 | 0.17 | 0.21 | 0.25 | 0.3  |
| M10 | Gout                                                                      | 3384  | 144718 | 0.06 | 0.11 | 0.2  | 0.31 | 0.45 | 0.6  | 0.73 | 0.84 | 0.91 | 0.96 |
| M11 | Other crystal arthropathies                                               | 345   | 147757 | 0.03 | 0.04 | 0.05 | 0.07 | 0.09 | 0.11 | 0.13 | 0.16 | 0.19 | 0.22 |
| M12 | Other specific arthropathies                                              | 112   | 147990 | 0.03 | 0.03 | 0.04 | 0.05 | 0.05 | 0.06 | 0.07 | 0.08 | 0.09 | 0.1  |
| M13 | Other arthritis                                                           | 10795 | 137307 | 0.09 | 0.25 | 0.48 | 0.73 | 0.89 | 0.97 | 0.99 | 1    | 1    | 1    |
| M15 | Polyarthrosis                                                             | 4082  | 144020 | 0.06 | 0.12 | 0.23 | 0.36 | 0.52 | 0.68 | 0.81 | 0.9  | 0.95 | 0.98 |

|     |                                                  |       |        |      |      |      |      |      |      |      |      |      |      |
|-----|--------------------------------------------------|-------|--------|------|------|------|------|------|------|------|------|------|------|
| M16 | Coxarthrosis [arthrosis of hip]                  | 8934  | 139168 | 0.08 | 0.22 | 0.42 | 0.65 | 0.83 | 0.94 | 0.98 | 1    | 1    | 1    |
| M17 | Gonarthrosis [arthrosis of knee]                 | 13973 | 134129 | 0.11 | 0.3  | 0.58 | 0.82 | 0.95 | 0.99 | 1    | 1    | 1    | 1    |
| M18 | Arthrosis of first carpometacarpal joint         | 1000  | 147102 | 0.04 | 0.06 | 0.09 | 0.12 | 0.17 | 0.23 | 0.29 | 0.36 | 0.44 | 0.52 |
| M19 | Other arthrosis                                  | 15690 | 132412 | 0.11 | 0.33 | 0.62 | 0.86 | 0.97 | 1    | 1    | 1    | 1    | 1    |
| M20 | Acquired deformities of fingers and toes         | 5365  | 142737 | 0.07 | 0.15 | 0.28 | 0.45 | 0.63 | 0.79 | 0.9  | 0.96 | 0.99 | 1    |
| M21 | Other acquired deformities of limbs              | 1520  | 146582 | 0.04 | 0.07 | 0.11 | 0.17 | 0.24 | 0.32 | 0.41 | 0.51 | 0.61 | 0.7  |
| M22 | Disorders of patella                             | 489   | 147613 | 0.03 | 0.05 | 0.06 | 0.08 | 0.11 | 0.13 | 0.17 | 0.2  | 0.25 | 0.29 |
| M23 | Internal derangement of knee                     | 7786  | 140316 | 0.08 | 0.19 | 0.38 | 0.59 | 0.79 | 0.91 | 0.97 | 0.99 | 1    | 1    |
| M24 | Other specific joint derangements                | 1577  | 146525 | 0.04 | 0.07 | 0.11 | 0.17 | 0.24 | 0.33 | 0.42 | 0.53 | 0.62 | 0.72 |
| M25 | Other joint disorders, not elsewhere classified  | 9216  | 138886 | 0.09 | 0.22 | 0.43 | 0.66 | 0.85 | 0.95 | 0.99 | 1    | 1    | 1    |
| M31 | Other necrotising vasculopathies                 | 539   | 147563 | 0.04 | 0.05 | 0.06 | 0.09 | 0.11 | 0.14 | 0.18 | 0.22 | 0.27 | 0.32 |
| M32 | Systemic lupus erythematosus                     | 219   | 147883 | 0.03 | 0.04 | 0.05 | 0.06 | 0.07 | 0.08 | 0.1  | 0.11 | 0.13 | 0.16 |
| M34 | Systemic sclerosis                               | 122   | 147980 | 0.03 | 0.03 | 0.04 | 0.05 | 0.05 | 0.06 | 0.07 | 0.08 | 0.09 | 0.11 |
| M35 | Other systemic involvement of connective tissue  | 2035  | 146067 | 0.05 | 0.08 | 0.14 | 0.21 | 0.3  | 0.41 | 0.52 | 0.63 | 0.73 | 0.82 |
| M40 | Kyphosis and lordosis                            | 288   | 147814 | 0.03 | 0.04 | 0.05 | 0.06 | 0.08 | 0.1  | 0.12 | 0.14 | 0.16 | 0.19 |
| M41 | Scoliosis                                        | 1146  | 146956 | 0.04 | 0.06 | 0.09 | 0.14 | 0.19 | 0.25 | 0.33 | 0.41 | 0.49 | 0.58 |
| M43 | Other deforming dorsopathies                     | 1533  | 146569 | 0.04 | 0.07 | 0.11 | 0.17 | 0.24 | 0.32 | 0.42 | 0.51 | 0.61 | 0.7  |
| M45 | Ankylosing spondylitis                           | 416   | 147686 | 0.03 | 0.04 | 0.06 | 0.08 | 0.1  | 0.12 | 0.15 | 0.18 | 0.22 | 0.26 |
| M46 | Other inflammatory spondylopathies               | 1244  | 146858 | 0.04 | 0.07 | 0.1  | 0.14 | 0.2  | 0.27 | 0.35 | 0.44 | 0.53 | 0.61 |
| M47 | Spondylosis                                      | 6853  | 141249 | 0.07 | 0.18 | 0.34 | 0.54 | 0.74 | 0.87 | 0.95 | 0.99 | 1    | 1    |
| M48 | Other spondylopathies                            | 3923  | 144179 | 0.06 | 0.12 | 0.22 | 0.35 | 0.51 | 0.66 | 0.79 | 0.89 | 0.95 | 0.98 |
| M49 | Spondylopathies in diseases classified elsewhere | 138   | 147964 | 0.03 | 0.04 | 0.04 | 0.05 | 0.06 | 0.07 | 0.08 | 0.09 | 0.1  | 0.11 |
| M50 | Cervical disk disorders                          | 1150  | 146952 | 0.04 | 0.06 | 0.09 | 0.14 | 0.19 | 0.25 | 0.33 | 0.41 | 0.49 | 0.58 |
| M51 | Other intervertebral disk disorders              | 5419  | 142683 | 0.07 | 0.15 | 0.28 | 0.46 | 0.64 | 0.79 | 0.9  | 0.96 | 0.99 | 1    |

|     |                                                            |       |        |      |      |      |      |      |      |      |      |      |      |
|-----|------------------------------------------------------------|-------|--------|------|------|------|------|------|------|------|------|------|------|
| M53 | Other dorsopathies, not elsewhere classified               | 385   | 147717 | 0.03 | 0.04 | 0.06 | 0.07 | 0.09 | 0.11 | 0.14 | 0.17 | 0.2  | 0.24 |
| M54 | Dorsalgia                                                  | 10822 | 137280 | 0.09 | 0.25 | 0.49 | 0.73 | 0.89 | 0.97 | 0.99 | 1    | 1    | 1    |
| M60 | Myositis                                                   | 170   | 147932 | 0.03 | 0.04 | 0.04 | 0.05 | 0.06 | 0.07 | 0.08 | 0.1  | 0.11 | 0.13 |
| M62 | Other disorders of muscle                                  | 774   | 147328 | 0.04 | 0.05 | 0.08 | 0.11 | 0.14 | 0.19 | 0.24 | 0.3  | 0.36 | 0.43 |
| M65 | Synovitis and tenosynovitis                                | 3193  | 144909 | 0.05 | 0.11 | 0.19 | 0.3  | 0.43 | 0.57 | 0.71 | 0.82 | 0.9  | 0.95 |
| M66 | Spontaneous rupture of synovium and tendon                 | 347   | 147755 | 0.03 | 0.04 | 0.05 | 0.07 | 0.09 | 0.11 | 0.13 | 0.16 | 0.19 | 0.22 |
| M67 | Other disorders of synovium and tendon                     | 2219  | 145883 | 0.05 | 0.09 | 0.14 | 0.22 | 0.32 | 0.43 | 0.55 | 0.67 | 0.77 | 0.85 |
| M70 | Soft tissue disorders related to use, overuse and pressure | 1068  | 147034 | 0.04 | 0.06 | 0.09 | 0.13 | 0.18 | 0.24 | 0.31 | 0.39 | 0.47 | 0.55 |
| M71 | Other bursopathies                                         | 629   | 147473 | 0.04 | 0.05 | 0.07 | 0.09 | 0.12 | 0.16 | 0.2  | 0.25 | 0.3  | 0.36 |
| M72 | Fibroblastic disorders                                     | 2590  | 145512 | 0.05 | 0.09 | 0.16 | 0.25 | 0.37 | 0.49 | 0.62 | 0.73 | 0.83 | 0.9  |
| M75 | Shoulder lesions                                           | 5357  | 142745 | 0.07 | 0.15 | 0.28 | 0.45 | 0.63 | 0.79 | 0.9  | 0.96 | 0.99 | 1    |
| M76 | Enthesopathies of lower limb, excluding foot               | 332   | 147770 | 0.03 | 0.04 | 0.05 | 0.07 | 0.08 | 0.1  | 0.13 | 0.15 | 0.18 | 0.21 |
| M77 | Other enthesopathies                                       | 1039  | 147063 | 0.04 | 0.06 | 0.09 | 0.13 | 0.18 | 0.23 | 0.3  | 0.38 | 0.46 | 0.54 |
| M79 | Other soft tissue disorders, not elsewhere classified      | 9102  | 139000 | 0.09 | 0.22 | 0.43 | 0.66 | 0.84 | 0.94 | 0.99 | 1    | 1    | 1    |
| M80 | Osteoporosis with pathological fracture                    | 726   | 147376 | 0.04 | 0.05 | 0.07 | 0.1  | 0.14 | 0.18 | 0.23 | 0.28 | 0.34 | 0.41 |
| M81 | Osteoporosis without pathological fracture                 | 6033  | 142069 | 0.07 | 0.16 | 0.31 | 0.5  | 0.68 | 0.83 | 0.93 | 0.97 | 0.99 | 1    |
| M84 | Disorders of continuity of bone                            | 1035  | 147067 | 0.04 | 0.06 | 0.09 | 0.13 | 0.18 | 0.23 | 0.3  | 0.38 | 0.46 | 0.54 |
| M85 | Other disorders of bone density and structure              | 1928  | 146174 | 0.05 | 0.08 | 0.13 | 0.2  | 0.29 | 0.39 | 0.5  | 0.61 | 0.71 | 0.8  |
| M86 | Osteomyelitis                                              | 468   | 147634 | 0.03 | 0.05 | 0.06 | 0.08 | 0.1  | 0.13 | 0.16 | 0.2  | 0.24 | 0.28 |
| M87 | Osteonecrosis                                              | 386   | 147716 | 0.03 | 0.04 | 0.06 | 0.07 | 0.09 | 0.11 | 0.14 | 0.17 | 0.2  | 0.24 |
| M88 | Paget's disease of bone [osteitis deformans]               | 138   | 147964 | 0.03 | 0.04 | 0.04 | 0.05 | 0.06 | 0.07 | 0.08 | 0.09 | 0.1  | 0.11 |
| M89 | Other disorders of bone                                    | 969   | 147133 | 0.04 | 0.06 | 0.09 | 0.12 | 0.17 | 0.22 | 0.28 | 0.36 | 0.43 | 0.51 |
| M90 | Osteopathies in diseases classified elsewhere              | 331   | 147771 | 0.03 | 0.04 | 0.05 | 0.07 | 0.08 | 0.1  | 0.13 | 0.15 | 0.18 | 0.21 |
| M93 | Other osteochondropathies                                  | 159   | 147943 | 0.03 | 0.04 | 0.04 | 0.05 | 0.06 | 0.07 | 0.08 | 0.09 | 0.11 | 0.12 |

|     |                                                                            |      |        |      |      |      |      |      |      |      |      |      |      |
|-----|----------------------------------------------------------------------------|------|--------|------|------|------|------|------|------|------|------|------|------|
| M94 | Other disorders of cartilage                                               | 512  | 147590 | 0.03 | 0.05 | 0.06 | 0.08 | 0.11 | 0.14 | 0.17 | 0.21 | 0.26 | 0.3  |
| M95 | Other acquired deformities of musculoskeletal system and connective tissue | 155  | 147947 | 0.03 | 0.04 | 0.04 | 0.05 | 0.06 | 0.07 | 0.08 | 0.09 | 0.11 | 0.12 |
| M96 | Postprocedural musculoskeletal disorders, not elsewhere classified         | 433  | 147669 | 0.03 | 0.05 | 0.06 | 0.08 | 0.1  | 0.12 | 0.15 | 0.19 | 0.22 | 0.26 |
| M99 | Biomechanical lesions, not elsewhere classified                            | 170  | 147932 | 0.03 | 0.04 | 0.04 | 0.05 | 0.06 | 0.07 | 0.08 | 0.1  | 0.11 | 0.13 |
| N02 | Recurrent and persistent haematuria                                        | 381  | 147721 | 0.03 | 0.04 | 0.06 | 0.07 | 0.09 | 0.11 | 0.14 | 0.17 | 0.2  | 0.24 |
| N03 | Chronic nephritic syndrome                                                 | 394  | 147708 | 0.03 | 0.04 | 0.06 | 0.07 | 0.09 | 0.12 | 0.14 | 0.17 | 0.21 | 0.24 |
| N04 | Nephrotic syndrome                                                         | 139  | 147963 | 0.03 | 0.04 | 0.04 | 0.05 | 0.06 | 0.07 | 0.08 | 0.09 | 0.1  | 0.11 |
| N05 | Unspecified nephritic syndrome                                             | 163  | 147939 | 0.03 | 0.04 | 0.04 | 0.05 | 0.06 | 0.07 | 0.08 | 0.1  | 0.11 | 0.13 |
| N08 | Glomerular disorders in diseases classified elsewhere                      | 305  | 147797 | 0.03 | 0.04 | 0.05 | 0.07 | 0.08 | 0.1  | 0.12 | 0.14 | 0.17 | 0.2  |
| N10 | Acute tubulo-interstitial nephritis                                        | 139  | 147963 | 0.03 | 0.04 | 0.04 | 0.05 | 0.06 | 0.07 | 0.08 | 0.09 | 0.1  | 0.11 |
| N11 | Chronic tubulo-interstitial nephritis                                      | 106  | 147996 | 0.03 | 0.03 | 0.04 | 0.04 | 0.05 | 0.06 | 0.07 | 0.08 | 0.09 | 0.1  |
| N12 | Tubulo-interstitial nephritis, not specified as acute or chronic           | 745  | 147357 | 0.04 | 0.05 | 0.08 | 0.1  | 0.14 | 0.18 | 0.23 | 0.29 | 0.35 | 0.41 |
| N13 | Obstructive and reflux uropathy                                            | 2421 | 145681 | 0.05 | 0.09 | 0.15 | 0.24 | 0.35 | 0.47 | 0.59 | 0.71 | 0.8  | 0.88 |
| N17 | Acute renal failure                                                        | 7667 | 140435 | 0.08 | 0.19 | 0.37 | 0.59 | 0.78 | 0.91 | 0.97 | 0.99 | 1    | 1    |
| N18 | Chronic renal failure                                                      | 7066 | 141036 | 0.08 | 0.18 | 0.35 | 0.56 | 0.75 | 0.88 | 0.96 | 0.99 | 1    | 1    |
| N19 | Unspecified renal failure                                                  | 941  | 147161 | 0.04 | 0.06 | 0.08 | 0.12 | 0.16 | 0.22 | 0.28 | 0.35 | 0.42 | 0.5  |
| N20 | Calculus of kidney and ureter                                              | 3162 | 144940 | 0.05 | 0.11 | 0.19 | 0.3  | 0.43 | 0.57 | 0.7  | 0.81 | 0.89 | 0.95 |
| N21 | Calculus of lower urinary tract                                            | 637  | 147465 | 0.04 | 0.05 | 0.07 | 0.09 | 0.12 | 0.16 | 0.2  | 0.25 | 0.31 | 0.36 |
| N23 | Unspecified renal colic                                                    | 925  | 147177 | 0.04 | 0.06 | 0.08 | 0.12 | 0.16 | 0.21 | 0.27 | 0.34 | 0.42 | 0.49 |
| N26 | Unspecified contracted kidney                                              | 146  | 147956 | 0.03 | 0.04 | 0.04 | 0.05 | 0.06 | 0.07 | 0.08 | 0.09 | 0.1  | 0.12 |
| N28 | Other disorders of kidney and ureter, not elsewhere classified             | 2543 | 145559 | 0.05 | 0.09 | 0.16 | 0.25 | 0.36 | 0.48 | 0.61 | 0.73 | 0.82 | 0.89 |

|     |                                                                         |       |        |      |      |      |      |      |      |      |      |      |      |
|-----|-------------------------------------------------------------------------|-------|--------|------|------|------|------|------|------|------|------|------|------|
| N30 | Cystitis                                                                | 1884  | 146218 | 0.05 | 0.08 | 0.13 | 0.2  | 0.28 | 0.38 | 0.49 | 0.6  | 0.7  | 0.79 |
| N31 | Neuromuscular dysfunction of bladder, not elsewhere classified          | 834   | 147268 | 0.04 | 0.06 | 0.08 | 0.11 | 0.15 | 0.2  | 0.25 | 0.31 | 0.38 | 0.45 |
| N32 | Other disorders of bladder                                              | 5807  | 142295 | 0.07 | 0.16 | 0.3  | 0.48 | 0.67 | 0.82 | 0.92 | 0.97 | 0.99 | 1    |
| N34 | Urethritis and urethral syndrome                                        | 93    | 148009 | 0.03 | 0.03 | 0.04 | 0.04 | 0.05 | 0.06 | 0.06 | 0.07 | 0.08 | 0.09 |
| N35 | Urethral stricture                                                      | 2034  | 146068 | 0.05 | 0.08 | 0.14 | 0.21 | 0.3  | 0.41 | 0.52 | 0.63 | 0.73 | 0.82 |
| N36 | Other disorders of urethra                                              | 503   | 147599 | 0.03 | 0.05 | 0.06 | 0.08 | 0.11 | 0.14 | 0.17 | 0.21 | 0.25 | 0.3  |
| N39 | Other disorders of urinary system                                       | 13197 | 134905 | 0.1  | 0.29 | 0.56 | 0.8  | 0.94 | 0.99 | 1    | 1    | 1    | 1    |
| N40 | Hyperplasia of prostate                                                 | 9293  | 138809 | 0.09 | 0.22 | 0.43 | 0.67 | 0.85 | 0.95 | 0.99 | 1    | 1    | 1    |
| N41 | Inflammatory diseases of prostate                                       | 1060  | 147042 | 0.04 | 0.06 | 0.09 | 0.13 | 0.18 | 0.24 | 0.31 | 0.38 | 0.46 | 0.55 |
| N42 | Other disorders of prostate                                             | 879   | 147223 | 0.04 | 0.06 | 0.08 | 0.11 | 0.16 | 0.2  | 0.26 | 0.33 | 0.4  | 0.47 |
| N43 | Hydrocele and spermatocele                                              | 903   | 147199 | 0.04 | 0.06 | 0.08 | 0.12 | 0.16 | 0.21 | 0.27 | 0.34 | 0.41 | 0.48 |
| N45 | Orchitis and epididymitis                                               | 553   | 147549 | 0.04 | 0.05 | 0.07 | 0.09 | 0.11 | 0.14 | 0.18 | 0.22 | 0.27 | 0.32 |
| N47 | Redundant prepuce, phimosis and paraphimosis                            | 1335  | 146767 | 0.04 | 0.07 | 0.1  | 0.15 | 0.21 | 0.29 | 0.37 | 0.46 | 0.55 | 0.64 |
| N48 | Other disorders of penis                                                | 1357  | 146745 | 0.04 | 0.07 | 0.1  | 0.15 | 0.22 | 0.29 | 0.38 | 0.47 | 0.56 | 0.65 |
| N49 | Inflammatory disorders of male genital organs, not elsewhere classified | 108   | 147994 | 0.03 | 0.03 | 0.04 | 0.05 | 0.05 | 0.06 | 0.07 | 0.08 | 0.09 | 0.1  |
| N50 | Other disorders of male genital organs                                  | 1656  | 146446 | 0.04 | 0.07 | 0.12 | 0.18 | 0.25 | 0.34 | 0.44 | 0.54 | 0.65 | 0.74 |
| N60 | Benign mammary dysplasia                                                | 1024  | 147078 | 0.04 | 0.06 | 0.09 | 0.13 | 0.17 | 0.23 | 0.3  | 0.37 | 0.45 | 0.53 |
| N61 | Inflammatory disorders of breast                                        | 277   | 147825 | 0.03 | 0.04 | 0.05 | 0.06 | 0.08 | 0.09 | 0.11 | 0.13 | 0.16 | 0.19 |
| N62 | Hypertrophy of breast                                                   | 404   | 147698 | 0.03 | 0.04 | 0.06 | 0.07 | 0.09 | 0.12 | 0.14 | 0.18 | 0.21 | 0.25 |
| N63 | Unspecified lump in breast                                              | 807   | 147295 | 0.04 | 0.06 | 0.08 | 0.11 | 0.15 | 0.19 | 0.25 | 0.31 | 0.37 | 0.44 |
| N64 | Other disorders of breast                                               | 713   | 147389 | 0.04 | 0.05 | 0.07 | 0.1  | 0.13 | 0.17 | 0.22 | 0.28 | 0.34 | 0.4  |
| N70 | Salpingitis and oophoritis                                              | 323   | 147779 | 0.03 | 0.04 | 0.05 | 0.07 | 0.08 | 0.1  | 0.12 | 0.15 | 0.18 | 0.21 |
| N71 | Inflammatory disease of uterus, except cervix                           | 131   | 147971 | 0.03 | 0.03 | 0.04 | 0.05 | 0.06 | 0.06 | 0.07 | 0.08 | 0.1  | 0.11 |
| N72 | Inflammatory disease of cervix uteri                                    | 598   | 147504 | 0.04 | 0.05 | 0.07 | 0.09 | 0.12 | 0.15 | 0.19 | 0.24 | 0.29 | 0.35 |

|     |                                                                                     |      |        |      |      |      |      |      |      |      |      |      |      |
|-----|-------------------------------------------------------------------------------------|------|--------|------|------|------|------|------|------|------|------|------|------|
| N73 | Other female pelvic inflammatory diseases                                           | 1441 | 146661 | 0.04 | 0.07 | 0.11 | 0.16 | 0.23 | 0.31 | 0.39 | 0.49 | 0.59 | 0.68 |
| N75 | Diseases of Bartholin's gland                                                       | 351  | 147751 | 0.03 | 0.04 | 0.05 | 0.07 | 0.09 | 0.11 | 0.13 | 0.16 | 0.19 | 0.22 |
| N76 | Other inflammation of vagina and vulva                                              | 454  | 147648 | 0.03 | 0.05 | 0.06 | 0.08 | 0.1  | 0.13 | 0.16 | 0.19 | 0.23 | 0.28 |
| N77 | Vulvovaginal ulceration and inflammation in diseases classified elsewhere           | 148  | 147954 | 0.03 | 0.04 | 0.04 | 0.05 | 0.06 | 0.07 | 0.08 | 0.09 | 0.1  | 0.12 |
| N80 | Endometriosis                                                                       | 1938 | 146164 | 0.05 | 0.08 | 0.13 | 0.2  | 0.29 | 0.39 | 0.5  | 0.61 | 0.71 | 0.8  |
| N81 | Female genital prolapse                                                             | 6162 | 141940 | 0.07 | 0.16 | 0.31 | 0.5  | 0.69 | 0.84 | 0.93 | 0.98 | 0.99 | 1    |
| N82 | Fistulae involving female genital tract                                             | 107  | 147995 | 0.03 | 0.03 | 0.04 | 0.05 | 0.05 | 0.06 | 0.07 | 0.08 | 0.09 | 0.1  |
| N83 | Noninflammatory disorders of ovary, Fallopian tube and broad ligament               | 2772 | 145330 | 0.05 | 0.1  | 0.17 | 0.27 | 0.39 | 0.52 | 0.65 | 0.76 | 0.85 | 0.92 |
| N84 | Polyp of female genital tract                                                       | 5286 | 142816 | 0.07 | 0.15 | 0.28 | 0.45 | 0.63 | 0.78 | 0.89 | 0.96 | 0.98 | 1    |
| N85 | Other noninflammatory disorders of uterus, except cervix                            | 2677 | 145425 | 0.05 | 0.1  | 0.16 | 0.26 | 0.38 | 0.5  | 0.63 | 0.75 | 0.84 | 0.91 |
| N86 | Erosion and ectropion of cervix uteri                                               | 486  | 147616 | 0.03 | 0.05 | 0.06 | 0.08 | 0.1  | 0.13 | 0.17 | 0.2  | 0.24 | 0.29 |
| N87 | Dysplasia of cervix uteri                                                           | 700  | 147402 | 0.04 | 0.05 | 0.07 | 0.1  | 0.13 | 0.17 | 0.22 | 0.27 | 0.33 | 0.39 |
| N88 | Other noninflammatory disorders of cervix uteri                                     | 976  | 147126 | 0.04 | 0.06 | 0.09 | 0.12 | 0.17 | 0.22 | 0.29 | 0.36 | 0.43 | 0.51 |
| N89 | Other noninflammatory disorders of vagina                                           | 883  | 147219 | 0.04 | 0.06 | 0.08 | 0.11 | 0.16 | 0.21 | 0.26 | 0.33 | 0.4  | 0.47 |
| N90 | Other noninflammatory disorders of vulva and perineum                               | 1115 | 146987 | 0.04 | 0.06 | 0.09 | 0.13 | 0.19 | 0.25 | 0.32 | 0.4  | 0.48 | 0.57 |
| N92 | Excessive, frequent and irregular menstruation                                      | 6373 | 141729 | 0.07 | 0.17 | 0.32 | 0.52 | 0.71 | 0.85 | 0.94 | 0.98 | 0.99 | 1    |
| N93 | Other abnormal uterine and vaginal bleeding                                         | 1956 | 146146 | 0.05 | 0.08 | 0.13 | 0.2  | 0.29 | 0.39 | 0.5  | 0.61 | 0.72 | 0.8  |
| N94 | Pain and other conditions associated with female genital organs and menstrual cycle | 1499 | 146603 | 0.04 | 0.07 | 0.11 | 0.17 | 0.23 | 0.32 | 0.41 | 0.51 | 0.6  | 0.69 |
| N95 | Menopausal and other perimenopausal disorders                                       | 5292 | 142810 | 0.07 | 0.15 | 0.28 | 0.45 | 0.63 | 0.78 | 0.89 | 0.96 | 0.98 | 1    |
| N97 | Female infertility                                                                  | 576  | 147526 | 0.04 | 0.05 | 0.07 | 0.09 | 0.12 | 0.15 | 0.19 | 0.23 | 0.28 | 0.33 |

|     |                                                                              |     |        |      |      |      |      |      |      |      |      |      |      |
|-----|------------------------------------------------------------------------------|-----|--------|------|------|------|------|------|------|------|------|------|------|
| N99 | Postprocedural disorders of genito-urinary system, not elsewhere classified  | 667 | 147435 | 0.04 | 0.05 | 0.07 | 0.1  | 0.13 | 0.17 | 0.21 | 0.26 | 0.32 | 0.38 |
| O00 | Ectopic pregnancy                                                            | 139 | 147963 | 0.03 | 0.04 | 0.04 | 0.05 | 0.06 | 0.07 | 0.08 | 0.09 | 0.1  | 0.11 |
| O02 | Other abnormal products of conception                                        | 603 | 147499 | 0.04 | 0.05 | 0.07 | 0.09 | 0.12 | 0.15 | 0.19 | 0.24 | 0.29 | 0.35 |
| O03 | Spontaneous abortion                                                         | 605 | 147497 | 0.04 | 0.05 | 0.07 | 0.09 | 0.12 | 0.15 | 0.19 | 0.24 | 0.29 | 0.35 |
| O04 | Medical abortion                                                             | 672 | 147430 | 0.04 | 0.05 | 0.07 | 0.1  | 0.13 | 0.17 | 0.21 | 0.26 | 0.32 | 0.38 |
| O06 | Unspecified abortion                                                         | 133 | 147969 | 0.03 | 0.03 | 0.04 | 0.05 | 0.06 | 0.06 | 0.07 | 0.09 | 0.1  | 0.11 |
| O13 | Gestational [pregnancy-induced] hypertension without significant proteinuria | 180 | 147922 | 0.03 | 0.04 | 0.04 | 0.05 | 0.06 | 0.07 | 0.09 | 0.1  | 0.12 | 0.14 |
| O14 | Gestational [pregnancy-induced] hypertension with significant proteinuria    | 119 | 147983 | 0.03 | 0.03 | 0.04 | 0.05 | 0.05 | 0.06 | 0.07 | 0.08 | 0.09 | 0.1  |
| O16 | Unspecified maternal hypertension                                            | 227 | 147875 | 0.03 | 0.04 | 0.05 | 0.06 | 0.07 | 0.08 | 0.1  | 0.12 | 0.14 | 0.16 |
| O20 | Haemorrhage in early pregnancy                                               | 442 | 147660 | 0.03 | 0.05 | 0.06 | 0.08 | 0.1  | 0.12 | 0.15 | 0.19 | 0.23 | 0.27 |
| O21 | Excessive vomiting in pregnancy                                              | 81  | 148021 | 0.03 | 0.03 | 0.04 | 0.04 | 0.05 | 0.05 | 0.06 | 0.07 | 0.07 | 0.08 |
| O23 | Infections of genito-urinary tract in pregnancy                              | 93  | 148009 | 0.03 | 0.03 | 0.04 | 0.04 | 0.05 | 0.06 | 0.06 | 0.07 | 0.08 | 0.09 |
| O24 | Diabetes mellitus in pregnancy                                               | 77  | 148025 | 0.03 | 0.03 | 0.04 | 0.04 | 0.05 | 0.05 | 0.06 | 0.07 | 0.07 | 0.08 |
| O26 | Maternal care for other conditions predominantly related to pregnancy        | 632 | 147470 | 0.04 | 0.05 | 0.07 | 0.09 | 0.12 | 0.16 | 0.2  | 0.25 | 0.3  | 0.36 |
| O30 | Multiple gestation                                                           | 95  | 148007 | 0.03 | 0.03 | 0.04 | 0.04 | 0.05 | 0.06 | 0.06 | 0.07 | 0.08 | 0.09 |
| O32 | Maternal care for known or suspected malpresentation of foetus               | 412 | 147690 | 0.03 | 0.04 | 0.06 | 0.07 | 0.09 | 0.12 | 0.15 | 0.18 | 0.21 | 0.25 |
| O34 | Maternal care for known or suspected abnormality of pelvic organs            | 575 | 147527 | 0.04 | 0.05 | 0.07 | 0.09 | 0.12 | 0.15 | 0.19 | 0.23 | 0.28 | 0.33 |
| O35 | Maternal care for known or suspected foetal abnormality and damage           | 115 | 147987 | 0.03 | 0.03 | 0.04 | 0.05 | 0.05 | 0.06 | 0.07 | 0.08 | 0.09 | 0.1  |

|     |                                                                    |      |        |      |      |      |      |      |      |      |      |      |      |
|-----|--------------------------------------------------------------------|------|--------|------|------|------|------|------|------|------|------|------|------|
| O36 | Maternal care for other known or suspected foetal problems         | 721  | 147381 | 0.04 | 0.05 | 0.07 | 0.1  | 0.14 | 0.18 | 0.22 | 0.28 | 0.34 | 0.4  |
| O41 | Other disorders of amniotic fluid and membranes                    | 96   | 148006 | 0.03 | 0.03 | 0.04 | 0.04 | 0.05 | 0.06 | 0.06 | 0.07 | 0.08 | 0.09 |
| O42 | Premature rupture of membranes                                     | 403  | 147699 | 0.03 | 0.04 | 0.06 | 0.07 | 0.09 | 0.12 | 0.14 | 0.18 | 0.21 | 0.25 |
| O43 | Placental disorders                                                | 84   | 148018 | 0.03 | 0.03 | 0.04 | 0.04 | 0.05 | 0.05 | 0.06 | 0.07 | 0.08 | 0.08 |
| O46 | Antepartum haemorrhage, not elsewhere classified                   | 240  | 147862 | 0.03 | 0.04 | 0.05 | 0.06 | 0.07 | 0.09 | 0.1  | 0.12 | 0.14 | 0.17 |
| O47 | False labour                                                       | 363  | 147739 | 0.03 | 0.04 | 0.06 | 0.07 | 0.09 | 0.11 | 0.13 | 0.16 | 0.19 | 0.23 |
| O48 | Prolonged pregnancy                                                | 473  | 147629 | 0.03 | 0.05 | 0.06 | 0.08 | 0.1  | 0.13 | 0.16 | 0.2  | 0.24 | 0.28 |
| O60 | Preterm delivery                                                   | 246  | 147856 | 0.03 | 0.04 | 0.05 | 0.06 | 0.07 | 0.09 | 0.1  | 0.12 | 0.15 | 0.17 |
| O62 | Abnormalities of forces of labour                                  | 182  | 147920 | 0.03 | 0.04 | 0.04 | 0.05 | 0.06 | 0.07 | 0.09 | 0.1  | 0.12 | 0.14 |
| O63 | Long labour                                                        | 677  | 147425 | 0.04 | 0.05 | 0.07 | 0.1  | 0.13 | 0.17 | 0.21 | 0.26 | 0.32 | 0.38 |
| O64 | Obstructed labour due to malposition and malpresentation of foetus | 140  | 147962 | 0.03 | 0.04 | 0.04 | 0.05 | 0.06 | 0.07 | 0.08 | 0.09 | 0.1  | 0.11 |
| O66 | Other obstructed labour                                            | 113  | 147989 | 0.03 | 0.03 | 0.04 | 0.05 | 0.05 | 0.06 | 0.07 | 0.08 | 0.09 | 0.1  |
| O68 | Labour and delivery complicated by foetal stress [distress]        | 1231 | 146871 | 0.04 | 0.07 | 0.1  | 0.14 | 0.2  | 0.27 | 0.35 | 0.43 | 0.52 | 0.61 |
| O69 | Labour and delivery complicated by umbilical cord complications    | 210  | 147892 | 0.03 | 0.04 | 0.05 | 0.06 | 0.07 | 0.08 | 0.09 | 0.11 | 0.13 | 0.15 |
| O70 | Perineal laceration during delivery                                | 1969 | 146133 | 0.05 | 0.08 | 0.13 | 0.2  | 0.29 | 0.39 | 0.51 | 0.62 | 0.72 | 0.81 |
| O71 | Other obstetric trauma                                             | 69   | 148033 | 0.03 | 0.03 | 0.04 | 0.04 | 0.05 | 0.05 | 0.06 | 0.06 | 0.07 | 0.08 |
| O72 | Postpartum haemorrhage                                             | 502  | 147600 | 0.03 | 0.05 | 0.06 | 0.08 | 0.11 | 0.14 | 0.17 | 0.21 | 0.25 | 0.3  |
| O73 | Retained placenta and membranes, without haemorrhage               | 80   | 148022 | 0.03 | 0.03 | 0.04 | 0.04 | 0.05 | 0.05 | 0.06 | 0.07 | 0.07 | 0.08 |

|     |                                                                                                          |     |        |      |      |      |      |      |      |      |      |      |      |
|-----|----------------------------------------------------------------------------------------------------------|-----|--------|------|------|------|------|------|------|------|------|------|------|
| O75 | Other complications of labour and delivery, not elsewhere classified                                     | 273 | 147829 | 0.03 | 0.04 | 0.05 | 0.06 | 0.08 | 0.09 | 0.11 | 0.13 | 0.16 | 0.18 |
| O80 | Single spontaneous delivery                                                                              | 773 | 147329 | 0.04 | 0.05 | 0.08 | 0.11 | 0.14 | 0.19 | 0.24 | 0.29 | 0.36 | 0.43 |
| O82 | Single delivery by Caesarean section                                                                     | 192 | 147910 | 0.03 | 0.04 | 0.05 | 0.05 | 0.06 | 0.08 | 0.09 | 0.11 | 0.12 | 0.14 |
| O86 | Other puerperal infections                                                                               | 73  | 148029 | 0.03 | 0.03 | 0.04 | 0.04 | 0.05 | 0.05 | 0.06 | 0.06 | 0.07 | 0.08 |
| O90 | Complications of the puerperium, not elsewhere classified                                                | 77  | 148025 | 0.03 | 0.03 | 0.04 | 0.04 | 0.05 | 0.05 | 0.06 | 0.07 | 0.07 | 0.08 |
| O99 | Other maternal diseases classifiable elsewhere but complicating pregnancy, childbirth and the puerperium | 641 | 147461 | 0.04 | 0.05 | 0.07 | 0.09 | 0.12 | 0.16 | 0.2  | 0.25 | 0.31 | 0.37 |
| Q05 | Spina bifida                                                                                             | 86  | 148016 | 0.03 | 0.03 | 0.04 | 0.04 | 0.05 | 0.05 | 0.06 | 0.07 | 0.08 | 0.09 |
| Q21 | Congenital malformations of cardiac septa                                                                | 379 | 147723 | 0.03 | 0.04 | 0.06 | 0.07 | 0.09 | 0.11 | 0.14 | 0.17 | 0.2  | 0.24 |
| Q23 | Congenital malformations of aortic and mitral valves                                                     | 221 | 147881 | 0.03 | 0.04 | 0.05 | 0.06 | 0.07 | 0.08 | 0.1  | 0.12 | 0.13 | 0.16 |
| Q24 | Other congenital malformations of heart                                                                  | 114 | 147988 | 0.03 | 0.03 | 0.04 | 0.05 | 0.05 | 0.06 | 0.07 | 0.08 | 0.09 | 0.1  |
| Q27 | Other congenital malformations of peripheral vascular system                                             | 100 | 148002 | 0.03 | 0.03 | 0.04 | 0.04 | 0.05 | 0.06 | 0.07 | 0.07 | 0.08 | 0.09 |
| Q38 | Other congenital malformations of tongue, mouth and pharynx                                              | 160 | 147942 | 0.03 | 0.04 | 0.04 | 0.05 | 0.06 | 0.07 | 0.08 | 0.09 | 0.11 | 0.12 |
| Q43 | Other congenital malformations of intestine                                                              | 182 | 147920 | 0.03 | 0.04 | 0.04 | 0.05 | 0.06 | 0.07 | 0.09 | 0.1  | 0.12 | 0.14 |
| Q50 | Congenital malformations of ovaries, Fallopian tubes and broad ligaments                                 | 98  | 148004 | 0.03 | 0.03 | 0.04 | 0.04 | 0.05 | 0.06 | 0.06 | 0.07 | 0.08 | 0.09 |
| Q51 | Congenital malformations of uterus and cervix                                                            | 103 | 147999 | 0.03 | 0.03 | 0.04 | 0.04 | 0.05 | 0.06 | 0.07 | 0.07 | 0.08 | 0.1  |
| Q60 | Renal agenesis and other reduction defects of kidney                                                     | 99  | 148003 | 0.03 | 0.03 | 0.04 | 0.04 | 0.05 | 0.06 | 0.06 | 0.07 | 0.08 | 0.09 |
| Q61 | Cystic kidney disease                                                                                    | 236 | 147866 | 0.03 | 0.04 | 0.05 | 0.06 | 0.07 | 0.09 | 0.1  | 0.12 | 0.14 | 0.16 |

|     |                                                   |     |        |      |      |      |      |      |      |      |      |      |      |
|-----|---------------------------------------------------|-----|--------|------|------|------|------|------|------|------|------|------|------|
| Q63 | Other congenital malformations of kidney          | 172 | 147930 | 0.03 | 0.04 | 0.04 | 0.05 | 0.06 | 0.07 | 0.08 | 0.1  | 0.11 | 0.13 |
| Q66 | Congenital deformities of feet                    | 149 | 147953 | 0.03 | 0.04 | 0.04 | 0.05 | 0.06 | 0.07 | 0.08 | 0.09 | 0.1  | 0.12 |
| Q76 | Congenital malformations of spine and bony thorax | 113 | 147989 | 0.03 | 0.03 | 0.04 | 0.05 | 0.05 | 0.06 | 0.07 | 0.08 | 0.09 | 0.1  |
| Q82 | Other congenital malformations of skin            | 91  | 148011 | 0.03 | 0.03 | 0.04 | 0.04 | 0.05 | 0.06 | 0.06 | 0.07 | 0.08 | 0.09 |
| Q85 | Phakomatoses, not elsewhere classified            | 92  | 148010 | 0.03 | 0.03 | 0.04 | 0.04 | 0.05 | 0.06 | 0.06 | 0.07 | 0.08 | 0.09 |

**Table S5. The association between PRS of IBS and common confounding factors.** P value less than 0.05 represented significant association between IBS and common confounders. PRS: polygenic risk score; IBS: irritable bowel syndrome; SE: standard error, **PC: principal component**.

| <b>Variables</b>     | <b>Beta</b> | <b>SE</b> | <b>P</b>               |
|----------------------|-------------|-----------|------------------------|
| Age (continuous)     | -0.02771    | 0.01895   | 0.14                   |
| BMI (continuous)     | 0.004689    | 0.00243   | 0.05                   |
| PC1 (continuous)     | 0.008987    | 0.003875  | 0.02                   |
| PC2 (continuous)     | -0.008113   | 0.003602  | 0.02                   |
| PC3 (continuous)     | 0.003603    | 0.003806  | 0.34                   |
| PC4 (continuous)     | -0.046446   | 0.007081  | $5.42 \times 10^{-11}$ |
| PC5 (continuous)     | -0.04265    | 0.01598   | 0.007                  |
| PC6 (continuous)     | 0.007998    | 0.003952  | 0.04                   |
| PC7 (continuous)     | -0.005764   | 0.004481  | 0.20                   |
| PC8 (continuous)     | 0.007863    | 0.004758  | 0.10                   |
| PC9 (continuous)     | -0.064471   | 0.011260  | $1.03 \times 10^{-8}$  |
| PC10 (continuous)    | -0.022570   | 0.005468  | $3.66 \times 10^{-5}$  |
| Gender (female/male) | -0.001921   | 0.004816  | 0.69                   |
| Smoking (Yes/No)     | 0.003616    | 0.004835  | 0.46                   |
| Alcohol (Yes/No)     | 0.01915     | 0.01417   | 0.18                   |

**Table S6. Individual-level MR results between IBS and identified outcomes in total and sex-stratified population.** *P* value less than 0.05 represented significant causal association from IBS to disease outcomes in one-sample MR analysis. MR, mendelian randomization; IBS: irritable bowel syndrome; OR: odds ratio; CI: confidence interval; GERD: Gastro-oesophageal reflux disease; MR: mendelian randomization.

| Descriptions                      | Total            |                       | Female           |                       | Male             |          |
|-----------------------------------|------------------|-----------------------|------------------|-----------------------|------------------|----------|
|                                   | OR (95% CI)      | <i>P</i>              | OR (95% CI)      | <i>P</i>              | OR (95% CI)      | <i>P</i> |
| Depression                        | 1.40 (1.21-1.63) | $1.10 \times 10^{-5}$ | 1.62 (1.31-2.00) | $8.31 \times 10^{-6}$ | 1.38 (0.94-2.00) | 0.10     |
| Oesophagitis                      | -                | -                     | 1.25 (1.06-1.47) | $7.53 \times 10^{-3}$ | -                | -        |
| GERD                              | 1.28 (1.14-1.43) | $2.55 \times 10^{-5}$ | 1.71 (1.44-2.03) | $1.19 \times 10^{-9}$ | 0.88 (0.68-1.14) | 0.33     |
| Dyspepsia                         | 1.57 (1.30-1.90) | $3.23 \times 10^{-6}$ | 1.85 (1.41-2.43) | $8.08 \times 10^{-6}$ | 1.48 (0.93-2.37) | 0.10     |
| Diaphragmatic hernia              | 1.28 (1.14-1.44) | $2.11 \times 10^{-5}$ | 1.42 (1.19-1.69) | $7.17 \times 10^{-5}$ | 1.10 (0.84-1.43) | 0.49     |
| Diverticular disease of intestine | 1.33 (1.19-1.47) | $2.03 \times 10^{-7}$ | -                | -                     | 1.16 (0.91-1.47) | 0.22     |

**Table S7. Summary-level MR results between IBS and outcomes identified in PheWAS.** MR, mendelian randomization; IBS, irritable bowel syndrome; PheWAS, phenome-wide association study. OR: odds ratio; CI: confidence interval; GERD: Gastro-oesophageal reflux disease; IVW: inverse-variance weighted.

| Descriptions                      | MR IVW (multiplicative random effects) |             |                         |                                        | MR-Egger            |             |          |                                     | Weighted median     |             |                         | Weighted mode       |             |          | MR_PRESSO           |             |                         |                                             | Outlier Variants                    | <i>P</i><br>Steiger <sup>d</sup> |
|-----------------------------------|----------------------------------------|-------------|-------------------------|----------------------------------------|---------------------|-------------|----------|-------------------------------------|---------------------|-------------|-------------------------|---------------------|-------------|----------|---------------------|-------------|-------------------------|---------------------------------------------|-------------------------------------|----------------------------------|
|                                   | OR<br>CI)                              | (95%<br>CI) | <i>P</i>                | <i>P</i><br>heterogeneity <sup>a</sup> | OR<br>CI)           | (95%<br>CI) | <i>P</i> | <i>P</i><br>pleiotropy <sup>b</sup> | OR<br>CI)           | (95%<br>CI) | <i>P</i>                | OR<br>CI)           | (95%<br>CI) | <i>P</i> | OR<br>CI)           | (95%<br>CI) | <i>P</i>                | <i>P</i><br>distortion<br>test <sup>c</sup> |                                     |                                  |
| Depression                        | 1.07<br>(1.01-1.14)                    |             | 0.02                    | 0.06                                   | 1.00<br>(0.84-1.18) |             | 0.94     | 0.35                                | 1.08<br>(1.00-1.17) |             | 0.05                    | 1.11<br>(0.90-1.36) |             | 0.33     | 1.09<br>(1.04-1.15) |             | 1.77 × 10 <sup>-3</sup> |                                             |                                     | 7.43 × 10 <sup>-77</sup>         |
| GERD                              | 1.09<br>(1.05-1.13)                    |             | 3.72 × 10 <sup>-5</sup> | 0.38                                   | 1.00<br>(0.89-1.12) |             | 0.95     | 0.12                                | 1.08<br>(1.01-1.14) |             | 0.01                    | 0.98<br>(0.84-1.16) |             | 0.84     | 1.09<br>(1.05-1.13) |             | 4.27 × 10 <sup>-5</sup> |                                             |                                     | 8.75 × 10 <sup>-79</sup>         |
| Dyspepsia                         | 1.21<br>(1.13-1.30)                    |             | 9.28 × 10 <sup>-8</sup> | 0.20                                   | 1.07<br>(0.88-1.31) |             | 0.50     | 0.22                                | 1.19<br>(1.08-1.31) |             | 5.32 × 10 <sup>-4</sup> | 1.18<br>(0.92-1.53) |             | 0.20     | 1.20<br>(1.12-1.28) |             | 5.61 × 10 <sup>-7</sup> |                                             |                                     | 3.77 × 10 <sup>-72</sup>         |
| Diaphragmatic hernia              | 1.10<br>(1.05-1.15)                    |             | 2.75 × 10 <sup>-5</sup> | 0.05                                   | 1.13<br>(0.99-1.29) |             | 0.07     | 0.67                                | 1.11<br>(1.04-1.18) |             | 0.002                   | 1.13<br>(0.97-1.33) |             | 0.12     | 1.10<br>(1.06-1.15) |             | 1.21 × 10 <sup>-5</sup> | 0.062                                       | rs13321176;<br>rs57810551;rs2731562 | 3.91 × 10 <sup>-72</sup>         |
| Diverticular disease of intestine | 1.13<br>(1.08-1.19)                    |             | 3.00 × 10 <sup>-6</sup> | 2.24 × 10 <sup>-6</sup>                | 1.03<br>(0.88-1.20) |             | 0.72     | 0.19                                | 1.09<br>(1.02-1.15) |             | 0.006                   | 1.07<br>(0.94-1.22) |             | 0.33     | 1.11<br>(1.07-1.16) |             | 5.23 × 10 <sup>-6</sup> |                                             |                                     | 3.87 × 10 <sup>-56</sup>         |

<sup>a</sup> *P* values for heterogeneity were derived from heterogeneity test and a *P* value < 0.05 indicates a possible heterogeneity.

<sup>b</sup> *P* values for pleiotropy were derived from MR-Egger test and a *P* value < 0.05 indicates a possible pleiotropic effect.

<sup>c</sup> *P* values for distortion were derived from MR-PRESSO test and a *P* value < 0.05 indicates a difference between estimates before and after outlier removal.

<sup>d</sup> *P* values for steiger were derived from direction test and a *P* value < 0.05 indicates correct direction.

*P* value less than 0.05 represented significant causal association from IBS to disease outcomes in summary-level MR analysis.

**Table S8. Identified pleiotropic SNPs of the association between genetically predicted IBS and disease outcomes with the significance threshold FDR=0.05 in the PheWAS analysis.** SNP: single nucleotide polymorphism; IBS: irritable bowel syndrome; FDR: false discovery rate; PheWAS: Phenome-wide association study; SE: standard error; OR: odds ratio.

| <b>Pleiotropic SNP</b> | <b>Beta</b> | <b>SE</b>   | <b>OR</b>        | <b><i>P</i></b>        | <b>Phenotype</b>     |
|------------------------|-------------|-------------|------------------|------------------------|----------------------|
| rs13321176             | -0.04289667 | 0.010100004 | 0.96 (0.94-0.98) | $2.16 \times 10^{-5}$  | Diverticular disease |
| rs2731562              | 0.07508206  | 0.007380233 | 1.08 (1.06-1.09) | $2.61 \times 10^{-24}$ | Diverticular disease |
| rs57810551             | 0.03901330  | 0.007681037 | 1.04 (1.02-1.06) | $3.79 \times 10^{-7}$  | Diverticular disease |

**Table S9. Sensitivity analysis of MR results by using additional publicly available GWAS summary data.** IBS: irritable bowel syndrome; OR: odds ratio; CI: confidence interval; GERD: Gastro-oesophageal reflux disease; IVW: inverse-variance weighted; MR: mendelian randomization.

| Descriptions         | MR IVW (multiplicative random effects) |                        |                                        | MR-Egger         |          |                                     | Weighted median  |                        | Weighted mode    |                       | MR_PRESSO        |                        |                                          | Outlier Variants | <i>P</i><br>Steiger<br>d |
|----------------------|----------------------------------------|------------------------|----------------------------------------|------------------|----------|-------------------------------------|------------------|------------------------|------------------|-----------------------|------------------|------------------------|------------------------------------------|------------------|--------------------------|
|                      | OR (95% CI)                            | <i>P</i>               | <i>P</i><br>heterogeneity <sup>a</sup> | OR (95% CI)      | <i>P</i> | <i>P</i><br>pleiotropy <sup>b</sup> | OR (95% CI)      | <i>P</i>               | OR (95% CI)      | <i>P</i>              | OR (95% CI)      | <i>P</i>               | <i>P</i><br>distortion test <sup>c</sup> |                  |                          |
| Depression           | 1.14 (1.10-1.18)                       | $3.68 \times 10^{-14}$ | $1.75 \times 10^{-11}$                 | 1.03 (0.93-1.14) | 0.56     | 0.04                                | 1.08 (1.04-1.12) | $3.22 \times 10^{-5}$  | 1.07 (0.98-1.16) | 0.13                  | 1.12 (1.09-1.16) | $7.01 \times 10^{-10}$ | -                                        | -                | $1.47 \times 10^{-100}$  |
| GERD                 | 1.20 (1.16-1.24)                       | $2.77 \times 10^{-26}$ | $3.20 \times 10^{-4}$                  | 1.11 (1.01-1.23) | 0.04     | 0.13                                | 1.19 (1.14-1.24) | $1.36 \times 10^{-16}$ | 1.26 (1.13-1.42) | $1.00 \times 10^{-4}$ | 1.19 (1.13-1.24) | $1.75 \times 10^{-8}$  | -                                        | -                | $1.98 \times 10^{-59}$   |
| Dyspepsia            | 1.03 (1.02-1.04)                       | $5.07 \times 10^{-8}$  | 0.84                                   | 1.03 (0.99-1.07) | 0.19     | 0.86                                | 1.03 (1.01-1.05) | $2.00 \times 10^{-4}$  | 1.03 (1.00-1.07) | 0.09                  | 1.03 (1.02-1.04) | $9.75 \times 10^{-6}$  | -                                        | -                | $6.19 \times 10^{-85}$   |
| Diaphragmatic hernia | 1.14 (1.08-1.20)                       | $4.87 \times 10^{-7}$  | $3.00 \times 10^{-4}$                  | 1.16 (0.99-1.37) | 0.08     | 0.84                                | 1.17 (1.09-1.24) | $3.73 \times 10^{-6}$  | 1.21 (1.01-1.44) | 0.04                  | 1.12 (1.06-1.19) | $1.46 \times 10^{-4}$  | -                                        | -                | $1.34 \times 10^{-80}$   |

|                                         |                      |                            |                      |      |      |                      |                            |                      |      |                      |                            |       |                               |                             |
|-----------------------------------------|----------------------|----------------------------|----------------------|------|------|----------------------|----------------------------|----------------------|------|----------------------|----------------------------|-------|-------------------------------|-----------------------------|
| Diverticular<br>disease of<br>intestine | 1.01 (1.01-<br>1.02) | 4.12 ×<br>10 <sup>-7</sup> | 1.00 (0.99-<br>1.01) | 0.72 | 0.04 | 1.01 (1.00-<br>1.01) | 6.45<br>× 10 <sup>-5</sup> | 1.01 (1.00-<br>1.01) | 0.13 | 1.01 (1.01-<br>1.01) | 1.17<br>× 10 <sup>-5</sup> | 0.317 | rs133211<br>76;rs578<br>10551 | 1.48<br>× 10 <sup>-52</sup> |
|-----------------------------------------|----------------------|----------------------------|----------------------|------|------|----------------------|----------------------------|----------------------|------|----------------------|----------------------------|-------|-------------------------------|-----------------------------|

<sup>a</sup> *P* values for heterogeneity were derived from heterogeneity test and a *P* value < 0.05 indicates a possible heterogeneity.

<sup>b</sup> *P* values for pleiotropy were derived from MR-Egger test and a *P* value < 0.05 indicates a possible pleiotropic effect.

<sup>c</sup> *P* values for distortion were derived from MR-PRESSO test and a *P* value < 0.05 indicates a difference between estimates before and after outlier removal.

<sup>d</sup> *P* values for steiger were derived from direction test and a *P* value < 0.05 indicates correct direction.

*P* value less than 0.05 represented significant causal association from IBS to disease outcomes in summary-level MR analysis.

**Table S10. Bidirectional MR results with 5 identified disease conditions as exposure and IBS as outcome.** IBS: irritable bowel syndrome; OR: odds ratio; CI: confidence interval; GERD: Gastro-oesophageal reflux disease; IVW: inverse-variance weighted; MR: mendelian randomization;

| Exposures                               | Num<br>ber<br>of<br>snps | MR IVW (multiplicative<br>random effects) |                        |                                            | MR-Egger                |          |                                         | Weighted<br>median      |                        | Weighted mode            |          | MR PRESSO               |                   |                                             | Outlier<br>Variants      |
|-----------------------------------------|--------------------------|-------------------------------------------|------------------------|--------------------------------------------|-------------------------|----------|-----------------------------------------|-------------------------|------------------------|--------------------------|----------|-------------------------|-------------------|---------------------------------------------|--------------------------|
|                                         |                          | OR<br>(95%<br>CI)                         | <i>P</i>               | <i>P</i><br>heterogene<br>ity <sup>a</sup> | OR<br>(95%<br>CI)       | <i>P</i> | <i>P</i><br>pleiotro<br>py <sup>b</sup> | OR<br>(95%<br>CI)       | <i>P</i>               | OR<br>(95%<br>CI)        | <i>P</i> | OR (95%<br>CI)          | <i>P</i>          | <i>P</i><br>distortion<br>test <sup>c</sup> |                          |
| Depression                              | 209                      | 1.26<br>(1.22-<br>1.31)                   | $1.46 \times 10^{-37}$ | $1.25 \times 10^{-5}$                      | 1.16<br>(1.01-<br>1.33) | 0.04     | 0.23                                    | 1.21<br>(1.15-<br>1.26) | $6.21 \times 10^{-16}$ | 1.19<br>(1.05-<br>1.36)  | 0.01     | 1.26<br>(1.21-<br>1.30) | $\times 10^{-28}$ | 0.83                                        | rs3099439                |
|                                         |                          | 1.27<br>(1.11-<br>1.45)                   |                        |                                            |                         |          |                                         |                         |                        |                          |          |                         |                   |                                             |                          |
|                                         |                          | 1.27<br>(1.11-<br>1.45)                   |                        |                                            |                         |          |                                         |                         |                        |                          |          |                         |                   |                                             |                          |
| GERD                                    | 128                      | 1.27<br>(1.11-<br>1.45)                   | $4.43 \times 10^{-4}$  | 0.05                                       | 1.38<br>(1.11-<br>1.71) | 0.00     | 5                                       | 0.29<br>(1.04-<br>1.59) | 0.02                   | 1.28<br>(0.12-<br>13.78) | 0.84     | 1.27<br>(1.11-<br>1.45) | $\times 10^{-4}$  |                                             |                          |
|                                         |                          | 1.00<br>(1.00-<br>1.00)                   |                        |                                            |                         |          |                                         |                         |                        |                          |          |                         |                   |                                             |                          |
|                                         |                          | 1.00<br>(1.00-<br>1.00)                   |                        |                                            |                         |          |                                         |                         |                        |                          |          |                         |                   |                                             |                          |
| Dyspepsia                               | 18                       | 1.00<br>(1.00-<br>1.00)                   | 0.71                   | 0.74                                       | 1.00<br>(1.00-<br>1.00) | 0.08     | 0.04                                    | 1.00<br>(1.00-<br>1.00) | 0.92                   | 1.00<br>(1.00-<br>1.00)  | 0.85     | 1.00<br>(1.00-<br>1.00) | 0.72              |                                             |                          |
|                                         |                          | 1.06<br>(1.01-<br>1.11)                   |                        |                                            |                         |          |                                         |                         |                        |                          |          |                         |                   |                                             |                          |
|                                         |                          | 1.06<br>(1.01-<br>1.11)                   |                        |                                            |                         |          |                                         |                         |                        |                          |          |                         |                   |                                             |                          |
| Diaphragmat<br>ic hernia                | 42                       | 1.06<br>(1.01-<br>1.11)                   | 0.01                   | $3.10 \times 10^{-4}$                      | 0.95<br>(0.81-<br>1.11) | 0.53     | 0.17                                    | 1.03<br>(0.98-<br>1.08) | 0.31                   | 1.00<br>(0.90-<br>1.11)  | 0.99     | 1.05<br>(1.01-<br>1.09) | 0.03              | 0.52                                        | rs2523598                |
|                                         |                          | 3.99<br>(2.83-<br>5.62)                   |                        |                                            |                         |          |                                         |                         |                        |                          |          |                         |                   |                                             |                          |
|                                         |                          | 3.99<br>(2.83-<br>5.62)                   |                        |                                            |                         |          |                                         |                         |                        |                          |          |                         |                   |                                             |                          |
| Diverticular<br>disease of<br>intestine | 116                      | 3.99<br>(2.83-<br>5.62)                   | $2.89 \times 10^{-15}$ | 0.03                                       | 1.51<br>(0.55-<br>4.14) | 0.42     | 0.05                                    | 3.03<br>(1.85-<br>4.97) | $1.12 \times 10^{-5}$  | 3.45<br>(1.27-<br>9.34)  | 0.02     | 3.54<br>(2.60-<br>4.82) | $\times 10^{-12}$ | 0.44                                        | rs1388625;rs<br>17730380 |
|                                         |                          |                                           |                        |                                            |                         |          |                                         |                         |                        |                          |          |                         |                   |                                             |                          |
|                                         |                          |                                           |                        |                                            |                         |          |                                         |                         |                        |                          |          |                         |                   |                                             |                          |

<sup>a</sup> *P* values for heterogeneity were derived from heterogeneity test and a *P* value < 0.05 indicates a possible heterogeneity.

<sup>b</sup> *P* values for pleiotropy were derived from MR-Egger test and a *P* value < 0.05 indicates a possible pleiotropic effect.

<sup>c</sup> *P* values for distortion were derived from MR-PRESSO test and a *P* value < 0.05 indicates a difference between estimates before and after outlier removal.

*P* value less than 0.05 represented significant causal association from IBS to disease outcomes in summary-level MR analysis.

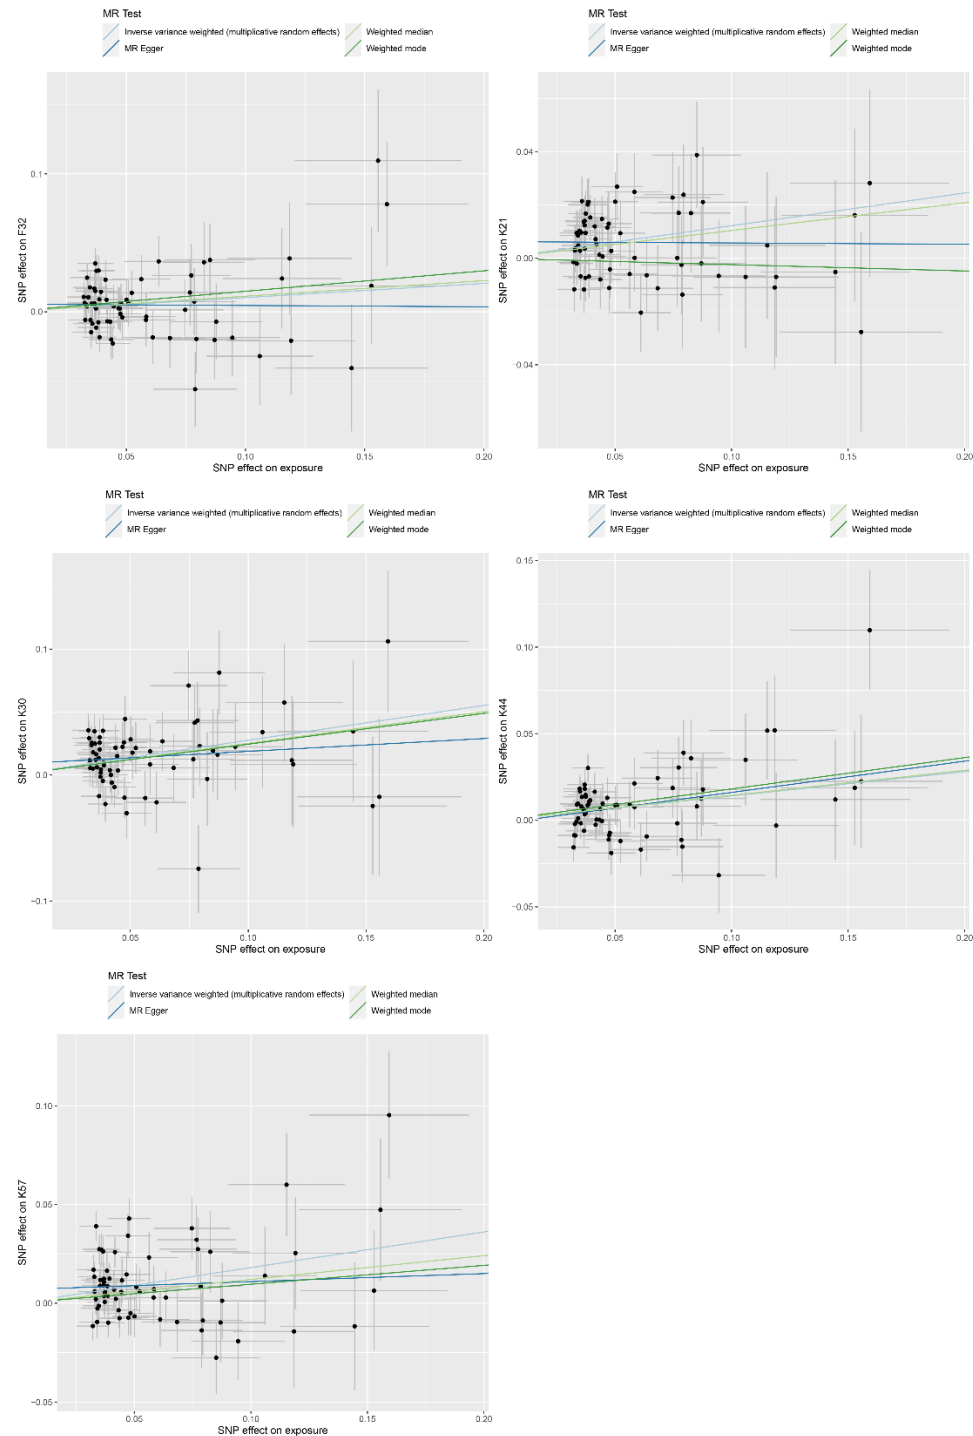

**Figure S1. Scatter plots to visualize the causal effect between IBS and depression, GERD, diaphragmatic hernia, dyspepsia and diverticular disease.** The slope of the straight lines correspond to causal estimates using each of four different methods (IVW random effects, MR-Egger, weighted median, and weighted mode). Outlier SNPs are labeled. IBS, irritable bowel syndrome; GERD, gastroesophageal reflux disease; MR, Mendelian randomization; SNP, single nucleotide polymorphism; IVW, inverse-variance weighted.

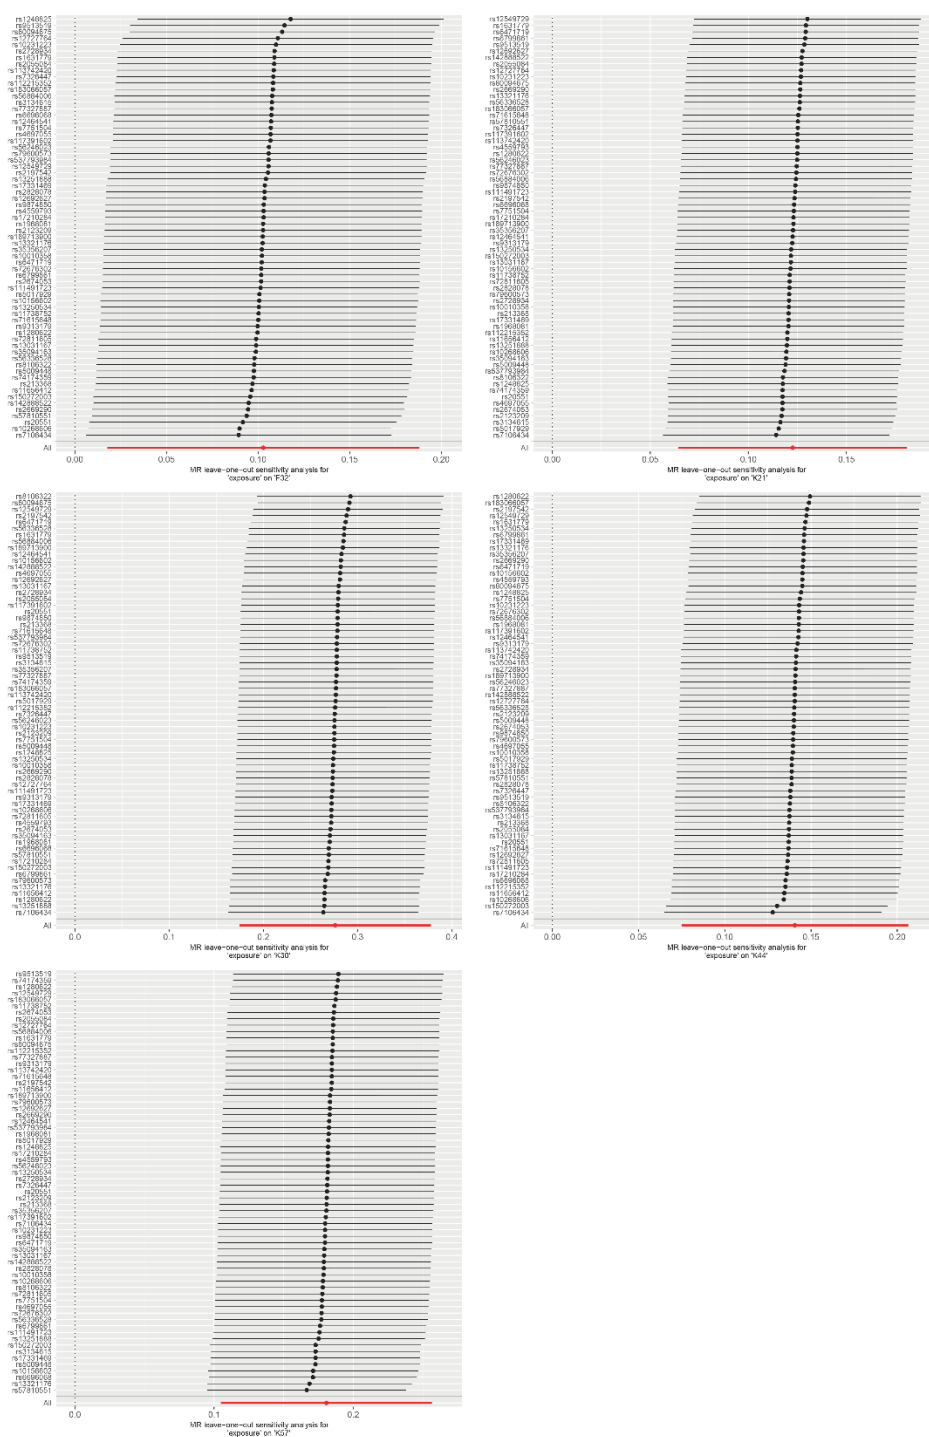

**Figure S2. Leave-one-out sensitivity analysis of the causal associations between IBS and depression, GERD, diaphragmatic hernia, dyspepsia and diverticular disease.** Each black point represents the effect size in the causal correlation of IBS on outcomes excluding that particular variant from the analysis. The red point depicts the estimated effect sizes using all SNPs. IBS, irritable bowel syndrome; GERD, gastroesophageal reflux disease; SNP, single nucleotide polymorphism.
